# Supplementary material for: Ruthenium-catalyzed stereo- and chemoselective oxidative coupling of vinyl ketones: efficient access to (E,E)-1,6-dioxo-2,4-dienes
Source: Royal Society of Chemistry journal article supplement (doi:10.1039/d1cc06680c), 2022-01-01
Supplement: d1cc06680c1.pdf [file d1cc06680c1.pdf]

Supplementary Information for

**Ruthenium Catalyzed Stereo- and Chemoselective Oxidative  
Coupling of Vinyl Ketones: An Efficient Access to (*E,E*)-1,6-  
dioxo-2,4-dienes**

Dattatraya H. Dethe\*, Appasaheb K. Nirpal<sup>†</sup>, Nagabhushana C. Beeralingappa<sup>†</sup>, Vimlesh Kumar<sup>†</sup>, Aparna  
Srivastava, Kunj B. Mishra, Arsheed A. Bhat

Department of Chemistry, Indian Institute of Technology-Kanpur, Kanpur - 208016, India.

E-mail: ddethe@iitk.ac.in, Tel: + 91-512-2596537, fax: + 91-512-2597436.

## Contents

|                                                                                                                        |         |
|------------------------------------------------------------------------------------------------------------------------|---------|
| 1. General information.....                                                                                            | 3       |
| 2. Optimization of Reaction Conditions.....                                                                            | 3       |
| 3. Experimental procedure                                                                                              |         |
| 3.1. General procedure for the oxidative coupling reaction of vinyl ketones.....                                       | 4       |
| 3.1a. Examples with spectral data for compounds <b>3</b> .....                                                         | 4 - 10  |
| 4. Experimental details for the synthesis of bioactive natural products <b>4, 5, 6</b> and <b>7</b> .....              | 10 - 11 |
| 5. <sup>1</sup> H and <sup>13</sup> C NMR of Compounds, <b>3</b> .....                                                 | 12 - 48 |
| 6. <sup>1</sup> H and <sup>13</sup> C NMR Spectra for the bioactive natural products <b>4, 5, 6</b> and <b>7</b> ..... | 49 - 59 |

## 1. General Information

**General Aspects:** Experiments involving moisture and air sensitive components were performed in oven-dried glassware. Commercial solvents and reagents were used without further purification unless otherwise noted. Yields refer to chromatographically pure compounds, unless otherwise stated. Reactions were monitored by thin-layer chromatography (TLC) carried out on 0.25 mm Merck silica gel plates (60F-254) using UV light as a visualizing agent and an *p*-anisaldehyde or ninhydrin stain, and heat as developing agents. Merck silica gel (particle size 100-200 and 230-400 mesh) was used for flash column chromatography. Neat compounds were used for record IR spectra. NMR spectra were recorded on either a Bruker Avance 400 (<sup>1</sup>H, 400 MHz; <sup>13</sup>C, 100 MHz), Bruker Avance 500 (<sup>1</sup>H, 500 MHz; <sup>13</sup>C, 125 MHz), or JEOL DELTA (ECX) 500 (<sup>1</sup>H, 500 MHz; <sup>13</sup>C, 125 MHz). Mass spectrometric data were obtained using WATERS-Q-ToF-Premier-HAB213 and WATERS-Q-ToF-Premier-APCI-MS instruments and IR data recorded from PerkinElmer, FT-IR spectrometer. The following abbreviations were used to explain the multiplicities: s = singlet, d = doublet, t = triplet, q = quartet, mspt = septet, dd = doublet of doublet, ddd = doublet of a doublet of a doublet, dt = doublet of a triplet, td = triplet of a doublet, m = multiplet, br = broad.

## 2. Table S1: Optimization of Reaction Conditions<sup>a</sup>

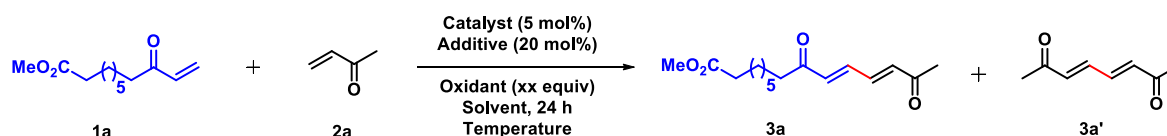

| Entry           | Catalyst (5 mol%)                                            | Additive (20 mol%) | Oxidant 1.0 equiv.   | Solvent                         | <sup>c</sup> Yield 3aa/3aa', (%) |
|-----------------|--------------------------------------------------------------|--------------------|----------------------|---------------------------------|----------------------------------|
| 1               | Cp*Co(CO)I <sub>2</sub> (C1)                                 | AgSbF <sub>6</sub> | Cu(OAc) <sub>2</sub> | DCE                             | 0                                |
| 2               | [RuCl <sub>2</sub> ( <i>p</i> -cymene)] <sub>2</sub> (C2)    | AgSbF <sub>6</sub> | Cu(OAc) <sub>2</sub> | DCE                             | 40/20                            |
| 3               | [Cp*RuCl <sub>2</sub> ] <sub>2</sub> (C3)                    | AgSbF <sub>6</sub> | Cu(OAc) <sub>2</sub> | DCE                             | 35/20                            |
| 4               | [RuCl <sub>2</sub> (PPh <sub>3</sub> ) <sub>3</sub> ] (C4)   | AgSbF <sub>6</sub> | Cu(OAc) <sub>2</sub> | DCE                             | 0                                |
| 5               | [CpRu(CH <sub>3</sub> CN) <sub>3</sub> ]PF <sub>6</sub> (C5) | -                  | -                    | DCE                             | 0                                |
| 6               | [Cp*RhCl <sub>2</sub> ] <sub>2</sub> (C6)                    | AgSbF <sub>6</sub> | Cu(OAc) <sub>2</sub> | DCE                             | 30/30                            |
| 7 <sup>b</sup>  | [RuCl <sub>2</sub> ( <i>p</i> -cymene)] <sub>2</sub> (C2)    | AgSbF <sub>6</sub> | Cu(OAc) <sub>2</sub> | MeOH                            | -                                |
| 8 <sup>b</sup>  | [RuCl <sub>2</sub> ( <i>p</i> -cymene)] <sub>2</sub> (C2)    | AgSbF <sub>6</sub> | Cu(OAc) <sub>2</sub> | dioxane                         | 40/20                            |
| 9 <sup>b</sup>  | [RuCl <sub>2</sub> ( <i>p</i> -cymene)] <sub>2</sub> (C2)    | AgSbF <sub>6</sub> | Cu(OAc) <sub>2</sub> | TFE                             | Trace                            |
| 10 <sup>b</sup> | [RuCl <sub>2</sub> ( <i>p</i> -cymene)] <sub>2</sub> (C2)    | AgSbF <sub>6</sub> | Cu(OAc) <sub>2</sub> | HFIP                            | Trace                            |
| 11 <sup>b</sup> | [RuCl <sub>2</sub> ( <i>p</i> -cymene)] <sub>2</sub> (C2)    | AgSbF <sub>6</sub> | Cu(OAc) <sub>2</sub> | toluene                         | Trace                            |
| 12 <sup>b</sup> | [RuCl <sub>2</sub> ( <i>p</i> -cymene)] <sub>2</sub> (C2)    | AgSbF <sub>6</sub> | Cu(OAc) <sub>2</sub> | CH <sub>2</sub> Cl <sub>2</sub> | 30/20                            |
| 13 <sup>b</sup> | [RuCl <sub>2</sub> ( <i>p</i> -cymene)] <sub>2</sub> (C2)    | AgSbF <sub>6</sub> | Cu(OAc) <sub>2</sub> | MeCN                            | Trace                            |
| 14 <sup>b</sup> | [RuCl <sub>2</sub> ( <i>p</i> -cymene)] <sub>2</sub> (C2)    | AgSbF <sub>6</sub> | Cu(OAc) <sub>2</sub> | <sup>t</sup> AmOH               | Trace                            |

Reaction conditions: <sup>a</sup>1a (0.4 mmol), 2a (0.3 mmol), [Ru(*p*-cymene)Cl<sub>2</sub>]<sub>2</sub> (5 mol %), additive (20 mol %) and oxidant (1.0 equiv.) in a specific solvent (3.0 mL) at 100 °C for 24 h. <sup>b</sup>Reaction carried out using 2.1 equiv of Cu(OAc)<sub>2</sub>·H<sub>2</sub>O at 80 °C. <sup>c</sup>Isolated yields are of pure product 3aa and 3aa' w. r. t acrylate 2a. TFE = Trifluoroethanol, HFIP = Hexafluoroisopropanol, DCM = dichloromethane, <sup>t</sup>AmOH = *t*-amyl alcohol

### 3. Experimental Procedures

#### 3.1. General procedure for the oxidative coupling reaction of vinyl ketones

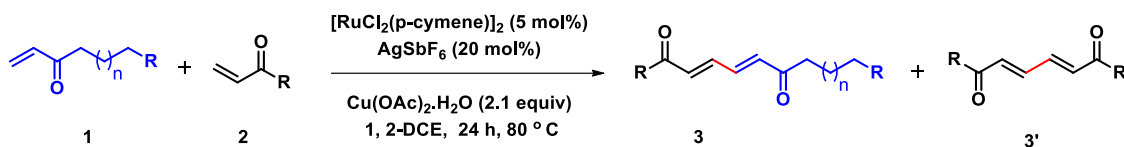

A 8 mL screw-cap vial was charged with  $[\text{RuCl}_2(\text{p-cymene})]_2$  (9.0 mg, 0.01 mmol, 5.0 mol%),  $\text{Cu}(\text{OAc})_2 \cdot \text{H}_2\text{O}$  (125 mg, 0.63 mmol, 2.1 equiv),  $\text{AgSbF}_6$  (21 mg, 0.06 mmol, 20 mol%) and 1,2-dichloroethane (2.0 mL). The vial was sealed under nitrogen and allowed to stir at room temperature under nitrogen atmosphere for 10 minutes. To this vinyl ketone **1** (0.40 mmol, 1.33 equiv) and vinyl ketone **2** (0.25 equiv) were added using a syringe and the reaction mixture was stirred at 80 °C (using an oil bath). To this reaction mixture, vinyl ketone **2** (0.30 mmol, 0.75 equiv) in 1,2-DCE (2.0 ml) was added slowly using syringe pump over 12 hrs., at 80 °C. Then the reaction mixture was stirred at same temperature for next 12 hrs. After cooling down, the mixture was diluted with ethyl acetate, filtrated and concentrated to give the crude compound which was directly purified by silica gel column chromatography.

{Note: 0.2 mmol scale reactions were carried out for the synthesis of carbohydrate derivatives, **3qi-3rl**. During the synthesis of natural product **4**, we isolated homodimer of decyl vinyl ketone as a minor product but we didn't get pure  $^1\text{H}$  NMR spectrum due to less compound. So we repeated same reaction in 3-batches (0.3 mmol  $\times$  3) to get pure spectra and for details, please see page 10).

#### 3.1a. Examples with data

**Compound 3aa** Following general procedure, **3aa** was purified by silica column chromatography (pet ether/EtOAc at a 8:2 ratio), obtained as a colourless solid (65 mg, 0.23 mmol, 78%). **IR** (neat):  $\nu_{\text{max}}/\text{cm}^{-1}$  2933, 2852, 1735, 1681, 1585, 1465, 1438, 1402, 1361, 1310, 1230, 1175, 1113, 1072, 977, 882, 763.  $^1\text{H}$  NMR (400 MHz,  $\text{CDCl}_3$ )  $\delta$  7.20 - 7.09 (m, 2H), 6.49 - 6.43 (m, 2H), 3.65 (s, 3H), 2.58 (t,  $J = 7.4$  Hz, 2H), 2.31 (s, 3H), 2.28 (t,  $J = 7.6$  Hz, 2H), 1.63 - 1.57 (m, 4H), 1.31 - 1.27 (m, 6H).  $^{13}\text{C}$  NMR (100 MHz,  $\text{CDCl}_3$ )  $\delta$  200.01, 197.84, 174.34, 139.88, 138.79, 136.78, 136.17, 51.57, 41.30, 34.11, 29.10, 29.04, 28.74, 27.97, 24.92, 23.95. **HRMS**(ESI-TOF)  $m/z$  calcd. for  $\text{C}_{16}\text{H}_{25}\text{O}_4$   $[\text{M}+\text{H}]^+$  281.1753; found 281.1751.

Following general procedure, **3aa'** was obtained as a white solid (7.5:2.5:hexane:EtOAc) (5 mg, 0.036 mmol, 12%); **IR** (neat):  $\nu_{\text{max}}/\text{cm}^{-1}$  3362, 3041, 2982, 2948, 2877, 1712, 1679, 1582, 1457, 1411, 1369, 1255, 991, 852, 735;  $^1\text{H}$  NMR (400 MHz,  $\text{CDCl}_3$ )  $\delta$  7.19 - 7.09 (m, 2H), 6.52 - 6.38 (m, 2H), 2.33 (s, 6H);  $^{13}\text{C}$  NMR (100 MHz,  $\text{CDCl}_3$ )  $\delta$  197.80 (2C), 139.76 (2C), 136.89 (2C), 27.94 (2C); **HRMS**  $m/z$  calcd for  $\text{C}_8\text{H}_{11}\text{O}_2$   $[\text{M}+\text{H}]^+$  139.0759; found 139.0762.

**Compound 3ab/3ab'** Following general procedure, **3ab** was purified by silica column chromatography (pet ether/EtOAc at a 8:2 ratio), obtained as a yellowish solid (65 mg, 0.22 mmol, 75%). **IR** (neat):  $\nu_{\text{max}}/\text{cm}^{-1}$  2930, 2853, 1735, 1682, 1585, 1464, 1435, 1406, 1376, 1308, 1225, 1169, 1073, 977, 881, 846, 762.  $^1\text{H}$  NMR (400 MHz,  $\text{CDCl}_3$ )  $\delta$  7.21 - 7.12 (m, 2H), 6.52 - 6.42 (m, 2H), 3.65 (s, 3H), 2.60 (dt,  $J = 22.7, 7.3$  Hz, 4H), 2.28 (t,  $J = 7.5$  Hz, 2H), 1.61 - 1.57 (m, 4H), 1.30 (m, 6H), 1.12 (t,  $J = 7.3$  Hz, 3H).  $^{13}\text{C}$  NMR (100 MHz,  $\text{CDCl}_3$ )  $\delta$  200.44, 200.09, 174.35, 138.88, 138.81, 135.94, 135.87, 51.57, 41.32, 34.60, 34.11, 29.81, 29.79, 28.75, 24.92, 23.96, 7.97. **HRMS**(ESI-TOF)  $m/z$  calcd. for  $\text{C}_{17}\text{H}_{27}\text{O}_4$   $[\text{M}+\text{H}]^+$  295.1909; found 295.1906.

Following general procedure, **3ab'** was obtained as a colourless solid (7.5:2.5:hexane:EtOAc) (6 mg, 0.039 mmol, 13%); **IR** (neat):  $\nu_{\text{max}}/\text{cm}^{-1}$  3360, 3040, 2979, 2938, 2887, 1713, 1681, 1585, 1458, 1410, 1370, 1258, 999, 853, 738;  $^1\text{H}$  NMR (400 MHz,  $\text{CDCl}_3$ )  $\delta$  7.23 - 7.09 (m, 2H), 6.51 - 6.41 (m, 2H), 2.62 (q,  $J = 7.3$  Hz, 4H), 1.11 (t,  $J = 7.2$  Hz, 6H);  $^{13}\text{C}$  NMR (100 MHz,  $\text{CDCl}_3$ )  $\delta$  200.46 (2C), 138.83 (2C), 135.82 (2C), 34.58 (2C), 7.96 (2C); **HRMS**  $m/z$  calcd for  $\text{C}_{10}\text{H}_{15}\text{O}_2$   $[\text{M}+\text{H}]^+$  167.1072; found 167.1076.

**Compound 3ad** Following general procedure, **3ad** was purified by silica column chromatography (pet ether/EtOAc at a 8:2 ratio), obtained as a colourless solid (76 mg, 0.23 mmol, 79%). **IR** (neat):  $\nu_{\text{max}}/\text{cm}^{-1}$  3357, 2932, 2856, 1736, 1681, 1585, 1466, 1436, 1402, 1368, 1305, 1224, 1169, 1071, 1027, 882, 724.  $^1\text{H}$  NMR (500 MHz,  $\text{CDCl}_3$ )  $\delta$  7.22 - 7.08 (m, 2H), 6.56 - 6.38 (m, 2H), 3.65 (s, 3H), 2.58 (td,  $J = 7.4, 5.5$  Hz, 4H), 2.30 (d,  $J = 7.5$  Hz, 2H), 1.61 (dd,  $J = 8.5, 6.3$  Hz, 6H), 1.34 - 1.30 (m, 8H),



0.92 (t,  $J = 7.3$  Hz, 3H).  $^{13}\text{C}$  NMR (100 MHz,  $\text{CDCl}_3$ )  $\delta$  200.09, 199.05, 174.31, 138.89, 138.85, 136.08, 136.01, 51.53, 41.32, 41.13, 34.10, 29.11, 29.08, 28.99, 26.20, 24.92, 23.97, 22.41, 13.92. HRMS(ESI-TOF)  $m/z$  calcd. for  $\text{C}_{19}\text{H}_{31}\text{O}_4$   $[\text{M}+\text{H}]^+$  323.2222; found 323.2231.

Following general procedure, **3ad**<sup>†</sup> was obtained as a white solid (7.5:2.5:hexane:EtOAc) (6 mg, 0.027 mmol, 9%); IR (neat):  $\nu_{\text{max}}/\text{cm}^{-1}$  3356, 3029, 2960, 2933, 2898, 1675, 1565, 1242, 1132, 1085, 1025, 870, 835, 720;  $^1\text{H}$  NMR (500 MHz,  $\text{CDCl}_3$ )  $\delta$  7.20 – 7.12 (m, 2H), 6.52 – 6.43 (m, 2H), 2.61 (t,  $J = 6.9$  Hz, 4H), 1.64 – 1.59 (m, 4H), 1.36 – 1.32 (m, 4H), 0.91 (t,  $J = 7.2$  Hz, 6H);  $^{13}\text{C}$  NMR (125 MHz,  $\text{CDCl}_3$ )  $\delta$  200.18 (2C), 138.90 (2C), 136.05 (2C), 41.11 (2C), 26.20 (2C), 22.40 (2C), 13.91 (2C); HRMS  $m/z$  calcd for  $\text{C}_{14}\text{H}_{23}\text{O}_2$   $[\text{M}+\text{H}]^+$  223.1698; found 223.1696.

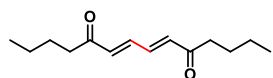

**Compound 3ae** Following general procedure, **3ae** was purified by silica column chromatography (pet ether/EtOAc at a 8:2 ratio), obtained as a yellowish solid (77 mg, 0.24 mmol, 80%). IR (neat):  $\nu_{\text{max}}/\text{cm}^{-1}$  3353, 3047, 2934, 2858, 1733, 1668, 1581, 1460, 1430, 1399, 1362, 1220, 1172, 1062, 1027, 882, 724.  $^1\text{H}$  NMR (400 MHz,  $\text{CDCl}_3$ )  $\delta$  7.14 – 7.17 (br d, 2H), 6.46 – 6.48 (br d, 2H), 3.65 (s, 3H), 2.57 (t,  $J = 7.4$  Hz, 2H), 2.46 (d,  $J = 6.2$  Hz, 2H), 2.28 (t,  $J = 7.3$  Hz, 2H), 2.16 – 2.14 (m, 1H), 1.61 – 1.58 (m, 4H), 1.31 (m, 6H), 0.94 (d,  $J = 5.6$  Hz, 6H).  $^{13}\text{C}$  NMR (100 MHz,  $\text{CDCl}_3$ )  $\delta$  199.91, 199.36, 174.30, 138.89 (2C), 136.37, 136.06, 51.51, 50.35, 41.32, 34.10, 29.75, 29.02, 28.98, 25.35, 25.12, 25.01, 23.98, 22.68. HRMS(ESI-TOF)  $m/z$  calcd. for  $\text{C}_{19}\text{H}_{31}\text{O}_4$   $[\text{M}+\text{H}]^+$  323.2222; found 323.2229.

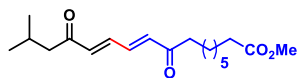

Following general procedure, **3ae**<sup>†</sup> was obtained as a white solid (7.5:2.5:hexane:EtOAc) (7 mg, 0.03 mmol, 10%); IR (neat):  $\nu_{\text{max}}/\text{cm}^{-1}$  3353, 3025, 2959, 2926, 2895, 1670, 1575, 1238, 1129, 1088, 1022, 868, 842, 719;  $^1\text{H}$  NMR (500 MHz,  $\text{CDCl}_3$ )  $\delta$  7.18 – 7.12 (m, 2H), 6.50 – 6.44 (m, 2H), 2.46 (d,  $J = 6.9$  Hz, 4H), 2.23 – 2.13 (m, 2H), 0.94 (d,  $J = 6.5$  Hz, 12H);  $^{13}\text{C}$  NMR (125 MHz,  $\text{CDCl}_3$ )  $\delta$  199.80 (2C), 138.91 (2C), 136.39 (2C), 50.35 (2C), 25.10 (2C), 22.69 (2C); HRMS  $m/z$  calcd for  $\text{C}_{14}\text{H}_{23}\text{O}_2$   $[\text{M}+\text{H}]^+$  223.1698; found 223.1695.

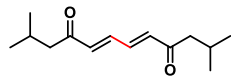

**Compound 3af** Following general procedure, **3af** was purified by silica column chromatography (pet ether/EtOAc at a 8:2 ratio), obtained as a colourless solid (72 mg, 0.21 mmol, 70%). IR (neat):  $\nu_{\text{max}}/\text{cm}^{-1}$  3353, 29329, 2867, 1738, 1683, 1580, 1468, 1422, 1404, 1301, 1242, 1168, 1109, 1017, 885, 720.  $^1\text{H}$  NMR (400 MHz,  $\text{CDCl}_3$ )  $\delta$  7.25 – 7.02 (m, 2H), 6.62 – 6.28 (m, 2H), 3.65 (s, 3H), 2.57 (td,  $J = 7.4, 1.6$  Hz, 4H), 2.29 (d,  $J = 7.4$  Hz, 2H), 1.63 – 1.59 (m, 6H), 1.29 (dd,  $J = 5.7, 2.9$  Hz, 12H), 0.87 (dd,  $J = 7.8, 5.8$  Hz, 3H).  $^{13}\text{C}$  NMR (100 MHz,  $\text{CDCl}_3$ )  $\delta$  200.24, 200.10, 174.35, 138.97, 138.88, 136.10, 136.02, 51.56, 41.43, 41.32, 34.14, 31.66, 29.09, 29.05, 28.99, 28.96, 24.92, 24.07, 23.97, 22.56, 14.10. HRMS(ESI-TOF)  $m/z$  calcd. for  $\text{C}_{21}\text{H}_{35}\text{O}_4$   $[\text{M}+\text{H}]^+$  351.2535; found 351.2542.

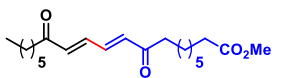

Following general procedure, **3af**<sup>†</sup> was obtained as a white solid (7.5:2.5:hexane:EtOAc) (8.0 mg, 0.03 mmol, 10%); IR (neat):  $\nu_{\text{max}}/\text{cm}^{-1}$  3355, 3044, 2956, 2927, 2885, 2854, 1680, 1575, 1464, 1402, 1368, 1340, 1236, 1214, 1129, 1078, 1012, 888, 832, 739, 722;  $^1\text{H}$  NMR (400 MHz,  $\text{CDCl}_3$ )  $\delta$  7.22 – 7.10 (m, 2H), 6.55 – 6.40 (m, 2H), 2.66 (t,  $J = 7.2$  Hz, 4H), 1.65 – 1.59 (m, 4H), 1.34 – 1.26 (m, 12H), 0.87 (t,  $J = 6.7$  Hz, 6H);  $^{13}\text{C}$  NMR (100 MHz,  $\text{CDCl}_3$ )  $\delta$  200.21 (2C), 138.90 (2C), 136.06 (2C), 41.43 (2C), 31.66 (2C), 28.96 (2C), 24.08 (2C), 22.56 (2C), 14.10 (2C); HRMS  $m/z$  calcd for  $\text{C}_{18}\text{H}_{31}\text{O}_2$   $[\text{M}+\text{H}]^+$  279.2324; found 279.2327.

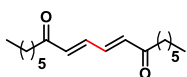

**Compound 3ba** Following general procedure, **3ba** was purified by silica column chromatography (pet ether/EtOAc at a 8:2 ratio), obtained as a colourless solid (71 mg, 0.24 mmol, 80%). IR (neat):  $\nu_{\text{max}}/\text{cm}^{-1}$  2927, 2851, 1735, 1680, 1584, 1437, 1359, 1229, 1016, 722.  $^1\text{H}$  NMR (500 MHz,  $\text{CDCl}_3$ )  $\delta$  7.24 – 7.04 (m, 2H), 6.56 – 6.38 (m, 2H), 3.65 (s, 3H), 2.58 (t,  $J = 7.4$  Hz, 2H), 2.32 (s, 3H), 2.29 (t,  $J = 7.5$  Hz, 2H), 1.61 (d,  $J = 7.2$  Hz, 4H), 1.29 (s, 8H).  $^{13}\text{C}$  NMR (125 MHz,  $\text{CDCl}_3$ )  $\delta$  199.97, 197.74, 174.29, 139.80, 138.67, 136.67, 136.09, 51.46, 41.24, 34.05, 29.16, 29.09, 29.03 (2C), 27.87, 24.87, 23.92. HRMS(ESI-TOF)  $m/z$  calcd. for  $\text{C}_{17}\text{H}_{26}\text{O}_4\text{Na}$   $[\text{M}+\text{Na}]^+$  317.1729; found 317.1727.

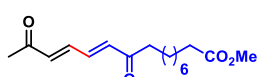

Homodimer of methyl vinyl ketone was obtained as a minor product (4 mg, 0.03 mmol, 10%). For data please see **3aa**<sup>†</sup>.

**Compound 3bc** Following general procedure, **3bc** was purified by silica column chromatography (pet ether/EtOAc at a 8:2 ratio), obtained as a colourless solid (72 mg, 0.22 mmol, 75%). IR (neat):  $\nu_{\text{max}}/\text{cm}^{-1}$  2927, 2853, 1730, 1681, 1585, 1438, 1369, 1224, 1030, 725.  $^1\text{H}$  NMR (500 MHz,  $\text{CDCl}_3$ )  $\delta$  7.21 – 7.10 (m, 2H), 6.53 – 6.40 (m, 2H), 3.65 (s, 3H), 2.57 (td,  $J = 7.3, 2.5$  Hz, 4H), 2.27

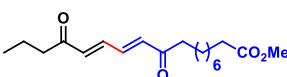

(d,  $J = 7.6$  Hz, 2H), 1.67 – 1.59 (m, 6H), 1.28 (s, 8H), 0.93 (t,  $J = 7.4$  Hz, 3H).  $^{13}\text{C NMR}$  (125 MHz,  $\text{CDCl}_3$ )  $\delta$  200.02, 199.95, 174.27, 138.80 (2C), 135.99, 135.94, 51.43, 43.15, 41.25, 34.04, 29.15, 29.09, 29.02 (2C), 24.87, 23.94, 17.45, 13.71. **HRMS**(ESI-TOF)  $m/z$  calcd. for  $\text{C}_{19}\text{H}_{31}\text{O}_4$   $[\text{M}+\text{H}]^+$  323.2222; found 323.2228.

Following general procedure, **3bc'** was obtained as a colourless solid (7.5:2.5:hexane:EtOAc) (5 mg, 0.036 mmol, 12%); **IR** (neat):  $\nu_{\text{max}}/\text{cm}^{-1}$  2968, 2924, 2869, 1745, 1725, 1696, 1564, 1468, 1409, 1379, 1248, 1065, 880, 723;  $^1\text{H NMR}$  (400 MHz,  $\text{CDCl}_3$ )  $\delta$  7.21 – 7.11 (m, 2H), 6.52 – 6.40 (m, 2H), 2.56 (t,  $J = 7.3$  Hz, 4H), 1.70–1.61 (m, 4H), 0.93 (t,  $J = 7.4$  Hz, 6H);  $^{13}\text{C NMR}$  (100 MHz,  $\text{CDCl}_3$ )  $\delta$  199.95 (2C), 138.86 (2C), 136.05 (2C), 43.23 (2C), 17.54 (2C), 13.77 (2C); **HRMS**  $m/z$  calcd for  $\text{C}_{12}\text{H}_{19}\text{O}_2$   $[\text{M}+\text{H}]^+$  195.1385; found 195.1389.

**Compound 3be** Following general procedure, **3be** was purified by silica column chromatography (pet ether/EtOAc at a 8:2 ratio), obtained as a colourless solid (78 mg, 0.23 mmol, 78%). **IR** (neat):  $\nu_{\text{max}}/\text{cm}^{-1}$  2928, 2852, 1736, 1680, 1581, 1468, 1365, 1222, 1029, 723.  $^1\text{H NMR}$  (500 MHz,  $\text{CDCl}_3$ )  $\delta$  7.23 – 7.06 (m, 2H), 6.55 – 6.40 (m, 2H), 3.65 (s, 3H), 2.57 (t,  $J = 7.4$  Hz, 2H), 2.46 (d,  $J = 7.0$  Hz, 2H), 2.28 (t,  $J = 7.5$  Hz, 2H), 2.21 – 2.12 (m, 1H), 1.60 (d,  $J = 8.4$  Hz, 4H), 1.29 (s, 8H), 0.94 (d,  $J = 6.7$  Hz, 6H).  $^{13}\text{C NMR}$  (125 MHz,  $\text{CDCl}_3$ )  $\delta$  200.04, 199.78, 174.29, 138.84(2C), 136.27, 135.99, 51.45, 50.24, 41.27, 34.04, 29.16, 29.10, 29.03 (2C), 25.00, 24.87, 23.94, 22.60 (2C). **HRMS**(ESI-TOF)  $m/z$  calcd. for  $\text{C}_{20}\text{H}_{32}\text{O}_4\text{Na}$   $[\text{M}+\text{Na}]^+$  359.2198; found 359.2197.

Homodimer of isobutyl vinyl ketone was obtained as a minor product (6 mg, 0.027 mmol, 9%). For data please see **3ae'**.

**Compound 3ca** Following general procedure, **3ca** was purified by silica column chromatography (pet ether/EtOAc at a 8:2 ratio), obtained as a white solid (50 mg, 0.21 mmol, 70%). **IR** (neat):  $\nu_{\text{max}}/\text{cm}^{-1}$  3473, 2952, 2948, 2832, 1723, 1645, 1476, 1379, 1223, 1216, 1102, 1023, 852, 742.  $^1\text{H NMR}$  (500 MHz,  $\text{CDCl}_3$ )  $\delta$  7.20 - 7.10 (m, 2H), 6.49 - 6.49 (m, 2H), 4.08 (t,  $J = 6.9$  Hz, 2H), 2.64 (t,  $J = 7.0$  Hz, 2H), 2.32 (s, 3H), 2.04 (s, 3H), 1.71 – 1.66 (m, 4H).  $^{13}\text{C NMR}$  (125 MHz,  $\text{CDCl}_3$ )  $\delta$  199.23, 199.26, 171.23, 139.68, 138.97, 136.90, 135.96, 64.04, 40.61, 28.05, 27.98, 21.04, 20.34. **HRMS**(ESI-TOF)  $m/z$  calcd. for  $\text{C}_{13}\text{H}_{19}\text{O}_4$   $[\text{M}+\text{H}]^+$  239.1283; found 239.1285.

Homodimer of methyl vinyl ketone was obtained as a minor product (3.0 mg, 0.024 mmol, 8%). For data please see **3aa'**.

**Compound 3da** Following general procedure, **3da** was purified by silica column chromatography (pet ether/EtOAc at a 8:2 ratio), obtained as a colourless solid (65 mg, 0.22 mmol, 76%). **IR** (neat):  $\nu_{\text{max}}/\text{cm}^{-1}$  3403, 3023, 2925, 2941, 2865, 1714, 1648, 1445, 1389, 1228, 1204, 1118, 1056, 856, 737;  $^1\text{H NMR}$  (400 MHz,  $\text{CDCl}_3$ )  $\delta$  7.36 – 7.22 (m, 5H), 7.19 - 7.07 (m, 2H), 6.47 - 6.47 (m, 2H), 4.48 (s, 2H), 3.48 (t,  $J = 6.2$  Hz, 2H), 2.62 (t,  $J = 7.2$  Hz, 2H), 2.31 (s, 3H), 1.80 – 1.69 (m, 2H), 1.65 – 1.61 (m, 2H);  $^{13}\text{C NMR}$  (100 MHz,  $\text{CDCl}_3$ )  $\delta$  199.78, 197.83, 139.87, 138.83, 138.54, 136.77, 136.16, 128.47 (2C), 127.69, 127.69 (2C), 73.02, 70.02, 40.95, 29.21, 27.96, 20.90. **HRMS**(ESI-TOF)  $m/z$  calcd. for  $\text{C}_{18}\text{H}_{23}\text{O}_3$   $[\text{M}+\text{H}]^+$  287.1647; found 287.1645.

Homodimer of methyl vinyl ketone was obtained as a minor product (5.0 mg, 0.036 mmol, 12%). For data please see **3aa'**.

**Compound 3db** Following general procedure, **3db** was purified by silica column chromatography (pet ether/EtOAc at a 8:2 ratio), obtained as a colourless solid (65 mg, 0.21 mmol, 72%). **IR** (neat):  $\nu_{\text{max}}/\text{cm}^{-1}$  3355, 3042, 2937, 2852, 2798, 1713, 1679, 1487, 1375, 1244, 1214, 1126, 1071, 841, 725.  $^1\text{H NMR}$  (400 MHz,  $\text{CDCl}_3$ )  $\delta$  7.33 – 7.26 (m, 5H), 7.19 – 7.10 (m, 2H), 6.50 – 6.40 (m, 2H), 4.48 (s, 2H), 3.48 (t,  $J = 6.2$  Hz, 2H), 2.65 – 2.58 (m, 4H), 1.76 – 1.70 (m, 2H), 1.66 – 1.62 (m, 2H), 1.12 (t,  $J = 7.3$  Hz, 3H).  $^{13}\text{C NMR}$  (100 MHz,  $\text{CDCl}_3$ )  $\delta$  200.33, 199.76, 138.89, 138.79, 138.45, 135.91, 135.77, 128.36 (2C), 127.69, 127.59 (2C), 72.92, 69.92, 40.87, 34.49, 29.12, 20.81, 7.87. **HRMS**(ESI-TOF)  $m/z$  calcd. for  $\text{C}_{19}\text{H}_{25}\text{O}_3$   $[\text{M}+\text{H}]^+$  301.1804; found 301.1802.

Homodimer of ethyl vinyl ketone was obtained as a minor product (6.0 mg, 0.036 mmol, 12%). For data please see **3ab'**.

**Compound 3cc** Following general procedure, **3cc** was purified by silica column chromatography (pet ether/EtOAc at a 8:2 ratio), obtained as a colourless solid (63 mg, 0.22 mmol, 75%). **IR** (neat):  $\nu_{\text{max}}/\text{cm}^{-1}$  3463, 2971, 2910, 2812, 1754, 1739, 1608, 1423, 1335, 1246, 1202, 1158, 1087, 856, 703.  $^1\text{H NMR}$  (500 MHz,  $\text{CDCl}_3$ )  $\delta$  7.20 - 7.12 (m, 2H), 6.41 - 6.49 (m, 2H), 4.02 (t,  $J = 6.6$  Hz, 2H), 2.56 (dt,  $J = 17.7, 7.3$  Hz, 4H), 2.00 (s, 3H), 1.65 – 1.60 (m, 6H), 1.35 (m, 2H), 0.91 (t,  $J =$

7.4 Hz, 3H).  $^{13}\text{C NMR}$  (125 MHz,  $\text{CDCl}_3$ )  $\delta$  199.96, 199.61, 171.20, 139.03, 138.77, 136.71, 135.90, 64.28, 43.21, 41.05, 28.49, 25.60, 23.56, 21.02, 17.51, 13.77. **HRMS**(ESI-TOF)  $m/z$  calcd. for  $\text{C}_{16}\text{H}_{25}\text{O}_4$   $[\text{M}+\text{H}]^+$  281.1753; found 281.1756.

Homodimer of propyl vinyl ketone was obtained as a minor product (8.0 mg, 0.039 mmol, 13%). For data please see **3bc**'.

**Compound 3gb** Following general procedure, **3gb** was purified by silica column chromatography (pet ether/EtOAc at a 8:2 ratio), obtained as a colourless solid (55 mg, 0.20 mmol, 69%). **IR** (neat):  $\nu_{\text{max}}/\text{cm}^{-1}$  3360, 3043, 2918, 2873, 2850, 1731, 1714, 1681, 1583, 1463, 1311, 1217, 1174, 910, 793.  $^1\text{H NMR}$  (400 MHz,  $\text{CDCl}_3$ )  $\delta$  7.22 – 7.13 (m, 2H), 6.53 – 6.42 (m, 2H), 4.11 (q,  $J = 7.1$  Hz, 2H), 2.63 (m, 4H), 2.31 (t,  $J = 7.0$  Hz, 2H), 1.66 – 1.62 (m, 2H), 1.26 – 1.22 (m, 2H), 1.24 (t,  $J = 7.3$  Hz, 3H), 1.12 (t,  $J = 7.3$  Hz, 3H).  $^{13}\text{C NMR}$  (100 MHz,  $\text{CDCl}_3$ )  $\delta$  200.35, 199.40, 173.39, 139.02, 138.63, 135.92, 135.81, 60.33, 40.77, 34.50, 34.03, 24.40, 23.28, 14.21, 7.85. **HRMS**(ESI-TOF)  $m/z$  calcd. for  $\text{C}_{15}\text{H}_{23}\text{O}_4$   $[\text{M}+\text{H}]^+$  267.1596; found 267.1594.

Homodimer of ethyl vinyl ketone was obtained as a minor product (6.0 mg, 0.036 mmol, 12%). For data please see **3ab**'.

**Compound 3gg** Following general procedure, **3gg** was purified by silica column chromatography (pet ether/EtOAc at a 8:2 ratio), obtained as a white solid (70 mg, 0.18 mmol, 62%). **IR** (neat):  $\nu_{\text{max}}/\text{cm}^{-1}$  3354, 2953, 2919, 2850, 1727, 1676, 1585, 1469, 1406, 1374, 1253, 1217, 1186, 908, 862, 718.  $^1\text{H NMR}$  (400 MHz,  $\text{CDCl}_3$ )  $\delta$  7.20 – 7.11 (m, 2H), 6.50 – 6.42 (m, 2H), 4.10 (q,  $J = 7.1$  Hz, 2H), 2.63 – 2.54 (m, 4H), 2.30 – 2.24 (m, 2H), 1.68 – 1.58 (m, 10H), 1.10 – 1.21 (m, 10H), 1.23 (s, 3H), 0.84 (t,  $J = 7.0$  Hz, 3H).  $^{13}\text{C NMR}$  (100 MHz,  $\text{CDCl}_3$ )  $\delta$  200.22, 199.47, 173.47, 139.13, 138.78, 136.20, 135.87, 60.42, 41.44, 40.87, 34.12, 31.95, 30.11, 29.53, 29.43, 29.37, 29.04, 24.50, 24.11, 23.39, 22.74, 14.25, 14.18. **HRMS**(ESI-TOF)  $m/z$  calcd. for  $\text{C}_{23}\text{H}_{39}\text{O}_4$   $[\text{M}+\text{H}]^+$  379.2848; found 379.2842.

Following general procedure, **3gg**' was obtained as a colourless solid (7.5:2.5:hexane:EtOAc) (16 mg, 0.04 mmol, 14%); **IR** (neat):  $\nu_{\text{max}}/\text{cm}^{-1}$  2953, 2918, 2850, 1677, 1586, 1470, 1405, 1371, 1313, 1244, 1218, 1131, 1100, 906, 853, 750;  $^1\text{H NMR}$  (400 MHz,  $\text{CDCl}_3$ )  $\delta$  7.21 – 7.11 (m, 2H), 6.53 – 6.41 (m, 2H), 2.60 (t,  $J = 6.8$  Hz, 4H), 1.65 – 1.58 (m, 4H), 1.27 – 1.24 (m, 28H), 0.86 (t,  $J = 6.9$  Hz, 6H);  $^{13}\text{C NMR}$  (100 MHz,  $\text{CDCl}_3$ )  $\delta$  200.24 (2C), 138.91 (2C), 136.06 (2C), 41.43 (2C), 31.96 (2C), 29.63 (2C), 29.54 (2C), 29.48 (2C), 29.38 (2C), 29.30 (2C), 24.12 (2C), 22.75 (2C), 14.19 (2C); **HRMS**  $m/z$  calcd for  $\text{C}_{26}\text{H}_{47}\text{O}_2$   $[\text{M}+\text{H}]^+$  391.3576; found 391.3572.

**Compound 3ha** Following general procedure, **3ha** was purified by silica column chromatography (pet ether/EtOAc at a 8.5:1.5 ratio), obtained as a colourless solid (78 mg, 0.22 mmol, 75%). **IR** (neat):  $\nu_{\text{max}}/\text{cm}^{-1}$  2915, 2849, 1674, 1594, 1467, 1359, 1235, 1082, 719.  $^1\text{H NMR}$  (500 MHz,  $\text{CDCl}_3$ )  $\delta$  7.20 – 7.07 (m, 2H), 6.58 – 6.34 (m, 2H), 2.58 (t,  $J = 7.4$  Hz, 2H), 2.32 (s, 3H), 1.61 (m, 2H), 1.30 – 1.23 (m, 26H), 0.87 (t,  $J = 6.9$  Hz, 3H).  $^{13}\text{C NMR}$  (125 MHz,  $\text{CDCl}_3$ )  $\delta$  200.04, 197.70, 139.80, 138.63, 136.64, 136.12, 41.33, 31.92, 29.93 – 28.97 (11C), 27.86, 24.03, 22.68, 14.11. **HRMS**(ESI-TOF)  $m/z$  calcd. for  $\text{C}_{23}\text{H}_{41}\text{O}_2$   $[\text{M}+\text{H}]^+$  349.3107; found 349.3108.

Homodimer of methyl vinyl ketone was obtained as a minor product (4.0 mg, 0.03 mmol, 10%). For data please see **3aa**'.

**Compound 3ib** Following general procedure, **3ib** was purified by silica column chromatography (pet ether/EtOAc at a 8.5:1.5 ratio), obtained as a colourless solid (34 mg, 0.20 mmol, 68%). **IR** (neat):  $\nu_{\text{max}}/\text{cm}^{-1}$  2923, 2852, 1708, 1690, 1594, 1436, 1329, 1248, 1149, 1033, 725.  $^1\text{H NMR}$  (400 MHz,  $\text{CDCl}_3$ )  $\delta$  7.31 (dd,  $J = 15.2, 11.4$  Hz, 1H), 7.16 (dd,  $J = 15.4, 11.3$  Hz, 1H), 6.44 (d,  $J = 15.4$  Hz, 1H), 6.22 (d,  $J = 15.2$  Hz, 1H), 3.77 (s, 3H), 2.62 (q,  $J = 7.3$  Hz, 2H), 1.11 (t,  $J = 7.3$  Hz, 3H).  $^{13}\text{C NMR}$  (100 MHz,  $\text{CDCl}_3$ )  $\delta$  200.41, 166.29, 141.65, 138.00, 135.32, 128.34, 51.93, 34.47, 7.84. **HRMS**(ESI-TOF)  $m/z$  calcd. for  $\text{C}_9\text{H}_{13}\text{O}_3$   $[\text{M}+\text{H}]^+$  169.0865; found 169.0869.

**Compound 3ja** Following general procedure, **3ja** was purified by silica column chromatography (pet ether/EtOAc at a 8:2 ratio), obtained as a colourless solid (34 mg, 0.16 mmol, 55%). **IR** (neat):  $\nu_{\text{max}}/\text{cm}^{-1}$  2920, 2853, 1713, 1675, 1584, 1445, 1409, 1372, 1330, 1279, 1263, 1140, 1109, 1091, 884, 794.  $^1\text{H NMR}$  (400 MHz,  $\text{CDCl}_3$ )  $\delta$  7.24 – 7.10 (m, 2H), 6.58 – 6.43 (m, 2H), 2.60 – 2.50 (m, 1H), 2.31 (s, 3H), 1.86 – 1.77 (m, 4H), 1.42 – 1.24 (m, 6H).  $^{13}\text{C NMR}$  (100 MHz,  $\text{CDCl}_3$ )  $\delta$  202.65, 197.90, 139.94, 138.76, 136.66, 134.93, 49.64, 28.48 (2C), 28.00, 25.86, 25.69 (2C). **HRMS**(ESI-TOF)  $m/z$  calcd. for  $\text{C}_{13}\text{H}_{19}\text{O}_2$   $[\text{M}+\text{H}]^+$  207.1385; found 207.1388.

Homodimer of methyl vinyl ketone was obtained as a minor product (5.0 mg, 0.036 mmol, 12%). For data please see **3aa**'.

**Compound 3jb** Following general procedure, **3jb** was purified by silica column chromatography (pet ether/EtOAc at a 8:2

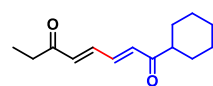

ratio), obtained as a colourless solid (37 mg, 0.17 mmol, 57%). **IR** (neat):  $\nu_{\text{max}}/\text{cm}^{-1}$  2923, 2850, 1678, 1582, 1449, 1408, 1369, 1331, 1264, 1238, 1142, 1118, 1066, 849, 702. **<sup>1</sup>H NMR** (400 MHz, CDCl<sub>3</sub>)  $\delta$  7.24 – 7.12 (m, 2H), 6.62 – 6.41 (m, 2H), 2.61 (q,  $J = 7.2$  Hz, 2H), 2.58 – 2.51 (m, 1H), 1.84 – 1.77 (m, 4H), 1.32 (m, 6H), 1.11 (t,  $J = 8$  Hz, 3H). **<sup>13</sup>C NMR** (100 MHz, CDCl<sub>3</sub>)  $\delta$  202.71, 200.48, 138.91, 138.87, 135.74, 134.78, 49.64, 34.64, 28.48 (2C), 25.87, 25.69 (2C), 7.97. **HRMS**(ESI-TOF)  $m/z$  calcd. for C<sub>14</sub>H<sub>21</sub>O<sub>2</sub> [M+H]<sup>+</sup> 221.1542; found 221.1545.

Homodimer of ethyl vinyl ketone was obtained as a minor product (5.0 mg, 0.03 mmol, 10%). For data please see **3ab'**.

**Compound 3kc** Following general procedure, **3kc** was purified by silica column chromatography (pet ether/EtOAc at a 8:2 ratio), obtained as a colourless solid (68 mg, 0.20 mmol, 69%).  $[\alpha]_{\text{D}}^{28} = +34.0$  ( $c = 0.2$ , CHCl<sub>3</sub>). **IR** (neat):  $\nu_{\text{max}}/\text{cm}^{-1}$  3444, 3028, 2937, 2964, 2877, 1795, 1630, 1464, 1387, 1239, 1197, 1071, 953, 864, 723. **<sup>1</sup>H NMR** (500 MHz, CDCl<sub>3</sub>)  $\delta$  8.01 (d,  $J = 8.2$ , 2H), 7.57 - 7.53 (t,  $J = 8.5$  Hz, 1H), 7.43 (t,  $J = 7.8$  Hz, 2H), 7.17 - 7.09 (m, 2H), 6.46 - 6.40 (m, 2H), 5.19 (m, 1H), 2.71 (t,  $J = 7.4$  Hz, 2H), 2.55 (t,  $J = 7.3$  Hz, 2H), 2.05 (dd,  $J = 14.2$ , 7.0 Hz, 2H), 1.65 (dd,  $J = 14.7$ , 7.3 Hz, 2H), 1.37 (d,  $J = 6.3$  Hz, 3H), 0.93 (t,  $J = 7.4$  Hz, 3H). **<sup>13</sup>C NMR** (125 MHz, CDCl<sub>3</sub>)  $\delta$  199.94, 198.82, 166.19, 139.26, 138.63, 136.26, 135.77, 133.03, 129.62 (3C), 128.44 (2C), 70.98, 43.25, 37.27, 30.20, 20.36, 17.53, 13.80. **HRMS**(ESI-TOF)  $m/z$  calcd. for C<sub>20</sub>H<sub>25</sub>O<sub>4</sub> [M+H]<sup>+</sup> 329.1753; found 329.1750.

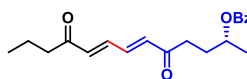

Homodimer of propyl vinyl ketone was obtained as a minor product (8.0 mg, 0.042 mmol, 14%). For data please see **3bc'**.

**Compound 3lc** Following general procedure, **3lc** was purified by silica column chromatography (pet ether/EtOAc at a 8:2 ratio), obtained as a brownish solid (50 mg, 0.19 mmol, 65%). **IR** (neat):  $\nu_{\text{max}}/\text{cm}^{-1}$  3404, 3027, 2960, 2925, 2852, 1711, 1677, 1585, 1496, 1453, 1366, 1218, 1185, 1068, 820, 747. **<sup>1</sup>H NMR** (500 MHz, CDCl<sub>3</sub>)  $\delta$  7.30 – 7.26 (m, 2H), 7.20 (m, 3H), 7.12 - 7.19 (m, 2H), 6.48 - 6.44 (m, 2H), 2.95 (dt,  $J = 6.3$ , 5.5 Hz, 4H), 2.56 (t,  $J = 7.2$  Hz, 2H), 1.64 – 1.60 (m, 2H), 0.95 (t,  $J = 7.2$  Hz, 3H). **<sup>13</sup>C NMR** (125 MHz, CDCl<sub>3</sub>)  $\delta$  199.96, 198.86, 140.89, 139.26, 138.72, 136.24, 135.86, 128.62 (2C), 128.41 (2C), 126.31, 43.27, 42.90, 29.94, 17.54, 13.79. **HRMS**(ESI-TOF)  $m/z$  calcd. for C<sub>17</sub>H<sub>21</sub>O<sub>2</sub> [M+H]<sup>+</sup> 257.1542; found 257.1546.

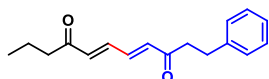

Homodimer of propyl vinyl ketone was obtained as a minor product (9.0 mg, 0.045 mmol, 15%). For data please see **3bc'**.

**Compound 3le** Following general procedure, **3le** was purified by silica column chromatography (pet ether/EtOAc at a 8:2 ratio), obtained as a brownish solid (56 mg, 0.21 mmol, 70%). **IR** (neat):  $\nu_{\text{max}}/\text{cm}^{-1}$  3408, 3025, 2961, 2940, 2828, 1721, 1652, 1586, 1423, 1405, 1360, 1208, 1126, 1087, 746, 699. **<sup>1</sup>H NMR** (500 MHz, CDCl<sub>3</sub>)  $\delta$  7.31 – 7.25 (m, 2H), 7.19 (m, 3H), 7.18 - 7.12 (m, 2H), 6.48 - 6.42 (m, 2H), 2.99 – 2.89 (m, 4H), 2.45 (d,  $J = 7.1$  Hz, 2H), 2.19 – 2.13 (m, 1H), 0.93 (d,  $J = 6.7$  Hz, 6H). **<sup>13</sup>C NMR** (125 MHz, CDCl<sub>3</sub>)  $\delta$  199.84, 198.90, 139.29, 138.79, 136.52, 135.92, 128.63 (2C), 128.43 (2C), 126.32, 50.35, 42.93, 29.92, 29.83, 25.08, 22.69 (2C). **HRMS**(ESI-TOF)  $m/z$  calcd. for C<sub>18</sub>H<sub>23</sub>O<sub>2</sub> [M+H]<sup>+</sup> 271.1698; found 271.1695.

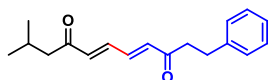

Homodimer of isobutyl vinyl ketone was obtained as a minor product (12.0 mg, 0.054 mmol, 18%). For data please see **3ae'**.

**Compound 3ma** Following general procedure, **3ma** was purified by silica column chromatography (pet ether/EtOAc at a 8:2 ratio), obtained as a colourless solid (38 mg, 0.19 mmol, 65%). **IR** (neat):  $\nu_{\text{max}}/\text{cm}^{-1}$  2969, 2934, 2880, 1746, 1680, 1589, 1472, 1410, 1382, 1362, 1232, 1209, 1145, 1136, 1074, 889, 728. **<sup>1</sup>H NMR** (500 MHz, CDCl<sub>3</sub>)  $\delta$  7.47 (dd,  $J = 15.5$ , 11.3 Hz, 1H), 7.03 (d,  $J = 11.3$  Hz, 1H), 6.42 (d,  $J = 15.5$  Hz, 1H), 2.70 (t,  $J = 7.4$  Hz, 2H), 2.33 (s, 3H), 2.02 (s, 3H), 1.60 – 1.58 (m, 2H), 1.34 – 1.32 (m, 2H), 0.92 (t,  $J = 7.3$  Hz, 3H). **<sup>13</sup>C NMR** (100 MHz, CDCl<sub>3</sub>)  $\delta$  201.81, 198.04, 143.83, 137.46, 135.14, 134.16, 37.67, 28.10, 26.73, 22.50, 14.00, 12.64. **HRMS**(ESI-TOF)  $m/z$  calcd. for C<sub>12</sub>H<sub>19</sub>O<sub>2</sub> [M+H]<sup>+</sup> 195.1385; found 195.1383.

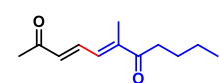

**Compound 3mc** Following general procedure, **3mc** was purified by silica column chromatography (pet ether/EtOAc at a 8:2 ratio), obtained as a colourless solid (45 mg, 0.20 mmol, 67%). **IR** (neat):  $\nu_{\text{max}}/\text{cm}^{-1}$  2960, 2932, 2874, 1711, 1690, 1614, 1463, 1409, 1367, 1259, 1210, 1176, 1126, 1094, 906, 732. **<sup>1</sup>H NMR** (400 MHz, CDCl<sub>3</sub>)  $\delta$  7.50 (dd,  $J = 15.3$ , 11.4 Hz, 1H), 7.02 (d,  $J = 11.4$  Hz, 1H), 6.45 (d,  $J = 15.4$  Hz, 1H), 2.72 (t,  $J = 7.3$  Hz, 2H), 2.58 (t,  $J = 7.3$  Hz, 2H), 2.01 (s, 3H), 1.70 – 1.65 (m, 2H), 1.60 – 1.56 (m, 2H), 1.36 – 1.31 (m, 2H), 0.96 (t,  $J = 7.3$  Hz, 3H), 0.89 (t,  $J = 7.3$  Hz, 3H). **<sup>13</sup>C NMR** (100 MHz, CDCl<sub>3</sub>)  $\delta$  201.87, 200.26, 143.70, 136.50, 134.44, 134.32, 43.40, 37.66, 26.75, 22.51, 17.64, 13.99, 13.82, 12.61. **HRMS**(ESI-TOF)  $m/z$  calcd. for C<sub>14</sub>H<sub>23</sub>O<sub>2</sub> [M+H]<sup>+</sup> 223.1698; found 223.1695.

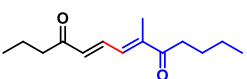

**Compound 3me** Following general procedure, **3me** was purified by silica column chromatography (pet ether/EtOAc at a 8:2 ratio), obtained as a colourless solid (45 mg, 0.19 mmol, 64%). **IR** (neat):  $\nu_{\text{max}}/\text{cm}^{-1}$  2956,

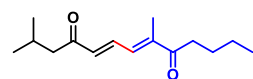

2941, 2869, 1721, 1695, 1611, 1436, 1421, 1376, 1262, 1205, 1167, 1160, 1001, 896, 726. **<sup>1</sup>H NMR** (400 MHz, CDCl<sub>3</sub>) δ 7.50 (dd, *J* = 15.3, 11.4 Hz, 1H), 7.02 (d, *J* = 11.4 Hz, 1H), 6.45 (d, *J* = 15.3 Hz, 1H), 2.70 (t, *J* = 7.4 Hz, 2H), 2.47 (d, *J* = 6.9 Hz, 2H), 2.19 – 2.16 (m, 1H), 2.02 (s, 3H), 1.63 – 1.59 (m, 2H), 1.37 – 1.33 (m, 2H), 0.96 (d, *J* = 6.6 Hz, 6H), 0.92 (t, *J* = 7.3 Hz, 3H). **<sup>13</sup>C NMR** (100 MHz, CDCl<sub>3</sub>) δ 201.86, 200.06, 143.78, 136.55, 134.70, 134.31, 50.53, 37.66, 32.00, 26.75, 25.18, 22.62, 22.52, 13.99, 12.63. **HRMS**(ESI-TOF) *m/z* calcd. for C<sub>15</sub>H<sub>25</sub>O<sub>2</sub> [M+H]<sup>+</sup> 237.1855; found 237.1859.

**Compound 3mf** Following general procedure, **3mf** was purified by silica column chromatography (pet ether/EtOAc at a 8:2 ratio), obtained as a colourless solid (41 mg, 0.15 mmol, 52%). **IR** (neat):  $\nu_{\max}/\text{cm}^{-1}$  2958, 2932, 2870, 1723, 1636, 1610, 1447, 1423, 1373, 1260, 1208, 1170, 1165, 1009, 816, 723. **<sup>1</sup>H NMR** (500 MHz, CDCl<sub>3</sub>) δ 7.50 (dd, *J* = 15.4, 11.4 Hz, 1H), 7.03 (d, *J* = 11.4 Hz, 1H), 6.45 (d, *J* = 15.3 Hz, 1H), 2.72 (t, *J* = 7.4 Hz, 2H), 2.59 (t, *J* = 7.4 Hz, 2H), 2.01 (s, 3H), 1.62 (dq, *J* = 22.8, 7.5 Hz, 6H), 1.35 – 1.29 (m, 6H), 0.92 (t, *J* = 7.4 Hz, 3H), 0.87 (t, *J* = 6.9 Hz, 3H). **<sup>13</sup>C NMR** (125 MHz, CDCl<sub>3</sub>) δ 201.83 (s), 200.36, 143.70, 136.47, 134.42, 134.30, 41.58, 37.66, 31.67, 29.00, 26.76, 24.19, 22.56, 22.51, 14.09, 13.98, 12.61. **HRMS**(ESI-TOF) *m/z* calcd. for C<sub>17</sub>H<sub>29</sub>O<sub>2</sub> [M+H]<sup>+</sup> 265.2168; found 265.2169.

**Compound 3ni** Following general procedure, **3ni** was purified by silica column chromatography (pet ether/EtOAc at a 8:2 ratio), obtained as a viscous liquid (90 mg, 0.12 mmol, 61%). *R<sub>f</sub>* = 0.45 (EtOAc-Hexane 2:8). **IR** (neat):  $\nu_{\max}/\text{cm}^{-1}$ : 3088, 3064, 3031, 2924, 2858, 1952, 1722, 1659, 1496, 1454, 1364, 1270, 1204, 1093, 1028. **<sup>1</sup>H NMR** (500 MHz, CDCl<sub>3</sub>) δ 7.32-7.20 (m, 25H), 6.82 (dt, *J* = 15.5, 6.5 Hz, 1H), 5.71 (dt, *J* = 15.5, 1.5 Hz, 1H), 4.69 (d, *J* = 3.0 Hz, 1H), 4.67 (d, *J* = 4.0 Hz, 1H), 4.63-4.58 (m, 2H), 4.56-4.54 (m, 2H), 4.48 (d, *J* = 3.0 Hz, 2H), 4.30 (d, *J* = 2.0 Hz, 2H), 4.09-4.07 (m, 1H), 4.05 (d, *J* = 4.5 Hz, 1H), 3.97 (t, *J* = 4.5 Hz, 1H), 3.89 (dd, *J* = 9.5, 4.5 Hz, 1H), 3.85 (dd, *J* = 10.0, 4.5 Hz, 1H), 3.69-3.66 (m, 4H), 2.65 (dt, *J* = 12.5, 7.0 Hz, 2H), 2.26 (dd, *J* = 14.5, 7.0 Hz, 2H). **<sup>13</sup>C NMR** (125 MHz, CDCl<sub>3</sub>) δ 210.2, 166.8, 147.9, 138.6, 138.1, 137.2, 128.4, 128.3, 128.2, 127.8, 127.7, 127.7, 127.6, 127.5, 127.4, 121.3, 84.5, 80.7, 79.3, 78.4, 74.7, 74.6, 73.3, 72.2, 71.7, 69.3, 51.3, 38.4, 25.4. **HRMS**(ESI-TOF) *m/z* calcd. for C<sub>47</sub>H<sub>50</sub>O<sub>8</sub>Na [M+Na]<sup>+</sup>: 765.3403; found 765.3409.

**Compound 3oi** Following general procedure, **3oi** was purified by silica column chromatography (pet ether/EtOAc at a 8:2 ratio), obtained as a viscous liquid (93 mg, 0.12 mmol, 63%). *R<sub>f</sub>* = 0.45 (EtOAc-Hexane 2:8). **IR** (neat):  $\nu_{\max}/\text{cm}^{-1}$ : 3088, 3064, 3031, 2923, 2853, 1721, 1665, 1453, 1360, 1261, 1210, 1098. **<sup>1</sup>H NMR** (500 MHz, CDCl<sub>3</sub>) δ 7.32-7.23 (m, 23H), 7.16-7.15 (m, 2H), 6.73 (dt, *J* = 15.5, 7.0 Hz, 1H), 5.63 (dt, *J* = 15.5, 1.0 Hz, 1H), 4.68-4.66 (m, 2H), 4.61 (d, *J* = 12.5 Hz, 3H), 4.49 (s, 2H), 4.46 (d, *J* = 3.0 Hz, 1H), 4.43 (d, *J* = 3.5 Hz, 1H), 4.37 (d, *J* = 12.0 Hz, 1H), 4.02 (s, 3H), 3.86 (dd, *J* = 10.5, 4.0 Hz, 1H), 3.74-3.64 (m, 5H), 2.40-2.31 (m, 2H), 2.16-2.04 (m, 2H). **<sup>13</sup>C NMR** (125 MHz, CDCl<sub>3</sub>) δ 208.6, 166.8, 147.9, 138.1, 137.2, 128.4, 128.3, 128.3, 128.1, 127.8, 127.7, 127.5, 127.5, 127.4, 121.2, 83.7, 80.6, 79.1, 78.2, 74.6, 74.2, 73.3, 71.9, 69.2, 51.3, 37.8, 25.4. **HRMS**(ESI-TOF) *m/z* calcd. for C<sub>47</sub>H<sub>50</sub>O<sub>8</sub>Na [M+Na]<sup>+</sup>: 765.3403; found 765.3408.

**Compound 3oj** Following general procedure, **3oj** was purified by silica column chromatography (pet ether/EtOAc at a 8:2 ratio), obtained as a viscous liquid (102 mg, 0.13 mmol, 65%). *R<sub>f</sub>* = 0.45 (EtOAc-Hexane 2:8). **IR** (neat):  $\nu_{\max}/\text{cm}^{-1}$ : 3087, 3061, 3028, 2924, 1718, 1663, 1453, 1275, 1260, 1098. **<sup>1</sup>H NMR** (400 MHz, CDCl<sub>3</sub>) δ 7.33-7.18 (m, 23H), 7.15-7.14 (m, 2H), 6.71 (dt, *J* = 15.6, 6.8 Hz, 1H), 5.62 (dt, *J* = 15.6, 1.6 Hz, 1H), 4.68 – 4.65 (m, 2H), 4.61 (d, *J* = 11.6 Hz, 3H), 4.49 (s, 2H), 4.45 (d, *J* = 2.8 Hz, 1H), 4.42 (d, *J* = 2.8 Hz, 1H), 4.36 (d, *J* = 12.0 Hz, 1H), 4.10 (t, *J* = 6.8 Hz, 2H), 4.01 (d, *J* = 1.6 Hz, 3H), 3.85 (dd, *J* = 10.4, 4.0 Hz, 1H), 3.74-3.71 (m, 1H), 3.65 (dd, *J* = 10.0, 4.8 Hz, 1H), 2.40-2.34 (m, 2H), 2.140 – 2.03 (m, 2H), 1.66-1.59 (m, 2H), 1.41-1.36 (m, 2H), 0.93 (t, *J* = 7.6 Hz, 3H). **<sup>13</sup>C NMR** (125 MHz, CDCl<sub>3</sub>) δ 208.6, 166.5, 153.5, 147.5, 138.8, 138.4, 138.1, 137.9, 137.2, 128.4, 128.3, 128.1, 128.0, 127.9, 127.7, 127.6, 127.5, 127.4, 121.6, 83.8, 80.6, 79.2, 78.3, 74.6, 74.2, 73.4, 71.9, 69.3, 64.0, 37.9, 30.7, 25.4, 19.1, 13.7. **HRMS**(ESI-TOF) *m/z* calcd. for C<sub>50</sub>H<sub>56</sub>O<sub>8</sub>Na [M+Na]<sup>+</sup>: 807.3873; found 807.3869.

**Compound 3ok** Following general procedure, **3ok** was purified by silica column chromatography (pet ether/EtOAc at a 8:2 ratio), obtained as a viscous liquid (94 mg, 0.12 mmol, 60%). *R<sub>f</sub>* = 0.45 (EtOAc-Hexane 2:8). **IR** (neat):  $\nu_{\max}/\text{cm}^{-1}$ : 3444, 3089, 3064, 2959, 2925, 2872, 1722, 1652, 1496, 1454, 1315, 1266, 1207, 1095, 1027. **<sup>1</sup>H NMR** (500 MHz, CDCl<sub>3</sub>) δ 7.31-7.25 (m, 23H), 7.17-7.16 (m, 2H), 6.73 (dt, *J* = 15.5, 7.0 Hz, 1H), 5.64 (dd, *J* = 15.5, 1.0 Hz, 1H), 4.69 (s, 2H), 4.67 (m, 1H), 4.61 (s, 1H), 4.50 (s, 2H), 4.50 (s, 2H), 4.46 (d, *J* = 2.0 Hz, 1H), 4.44 (d, *J* = 2.5 Hz, 1H), 4.37 (d, *J* = 12.0 Hz, 1H), 4.03 – 4.02 (m, 3H), 3.91 (d, *J* = 1.0 Hz, 1H), 3.90 (d, *J* = 1.0 Hz, 1H), 3.87 (dd, *J* = 10.0, 4.0 Hz, 1H), 3.75-3.74 (m, 1H), 3.67 (dd, *J* = 10.0, 5.0 Hz, 1H), 2.42-2.36 (m, 2H), 2.17-2.04 (m, 2H), 1.96 (dt, *J* = 13.5, 6.5 Hz, 1H), 0.96 (dd, *J* = 7.0, 6H). **<sup>13</sup>C NMR** (125 MHz, CDCl<sub>3</sub>) δ 208.6, 166.5, 147.5, 138.5, 138.4, 138.1, 137.9, 137.2, 128.5, 128.4, 128.3, 128.1, 127.9, 127.8, 127.7, 127.5, 127.5, 127.3, 126.9, 121.6, 83.8, 80.6, 79.2, 78.3, 74.6, 74.2, 73.3, 71.9, 70.3, 69.2, 65.3, 37.8, 27.7, 25.4, 19.1. **HRMS**(ESI-TOF) *m/z* calcd. for C<sub>50</sub>H<sub>56</sub>O<sub>8</sub>Na [M+Na]<sup>+</sup>: 807.3873; found 807.3870.



**Compound 3ol** Following general procedure, **3ol** was purified by silica column chromatography (pet ether/EtOAc at a 8:2 ratio), obtained as a viscous liquid (89 mg, 0.11 mmol, 55%).  $R_f = 0.45$  (EtOAc-Hexane 2:8). **IR** (neat):  $\nu_{\max}/\text{cm}^{-1}$ : 3421, 3031, 3063, 2923, 2853, 1715, 1653, 1496, 1453, 1362, 1262, 1177, 1094, 1026;  **$^1\text{H NMR}$**  (500 MHz,  $\text{CDCl}_3$ )  $\delta$  7.35-7.28 (m, 23H), 7.16 (dd,  $J = 7.0, 2.0$  Hz, 2H), 6.71 (dt,  $J = 15.5, 7.0$  Hz, 1H), 5.61 (d,  $J = 15.5$  Hz, 1H), 4.81-4.77 (m, 1H), 4.68 (d,  $J = 2.0$  Hz, 1H), 4.66 (d,  $J = 2.5$  Hz, 1H), 4.61 (dd,  $J = 12.0, 3.0$  Hz, 3H), 4.49 (s, 2H), 4.46 (d,  $J = 5.0$  Hz, 1H), 4.44 (d,  $J = 5.0$  Hz, 1H), 4.36 (d,  $J = 12.0$  Hz, 1H), 4.02 (d,  $J = 3.5$  Hz, 3H), 3.86 (dd,  $J = 10.0, 4.0$  Hz, 1H), 3.78-3.72 (m, 1H), 3.66 (dd,  $J = 10.0, 5.0$  Hz, 1H), 2.41-2.35 (m, 2H), 2.14-2.07 (m, 2H), 1.87-1.85 (m, 2H), 1.74-1.2 (m, 2H), 1.59-1.54 (d, 2H), 1.44-1.34 (m, 4H).  **$^{13}\text{C NMR}$**  (125 MHz,  $\text{CDCl}_3$ )  $\delta$  208.6, 165.9, 147.1, 128.4, 128.3, 128.1, 127.9, 127.9, 127.7, 127.5, 127.5, 127.4, 122.2, 83.8, 80.5, 79.2, 78.3, 74.6, 74.2, 73.3, 72.3, 71.9, 69.2, 37.8, 31.6, 25.3, 23.7. **HRMS**(ESI-TOF)  $m/z$  calcd. for  $\text{C}_{52}\text{H}_{58}\text{O}_8\text{Na}$   $[\text{M}+\text{Na}]^+$ : 833.4029; found 833.4039.

#### 4. Synthesis of bioactive natural products 4, 5, 6 and 7

**Compound 4** Following general procedure, **4** was purified by silica column chromatography (pet ether/EtOAc at a 8:2 ratio), obtained as a white solid (48 mg, 0.14 mmol, 48%). **IR** (neat):  $\nu_{\max}/\text{cm}^{-1}$  2954, 2918, 2850, 1706, 1678, 1586, 1469, 1406, 1373, 1245, 1216, 1077, 718.  **$^1\text{H NMR}$**  (400 MHz,  $\text{CDCl}_3$ )  $\delta$  7.21 – 7.11 (m, 2H), 6.53 – 6.39 (m, 2H), 2.57 (t,  $J = 7.4$  Hz, 4H), 1.66 – 1.59 (m, 6H), 1.32 – 1.25 (m, 16H), 0.88 (t,  $J = 7.3$  Hz, 3H), 0.85 (t,  $J = 7.2$  Hz, 3H).  **$^{13}\text{C NMR}$**  (100 MHz,  $\text{CDCl}_3$ )  $\delta$  200.24 (2C), 138.91 (2C), 136.06 (2C), 41.43, 41.38, 31.96, 31.46, 29.63, 29.54, 29.48, 29.38(2C), 29.30, 24.12, 23.80, 22.77, 22.64, 14.09, 13.99. **HRMS**(ESI-TOF)  $m/z$  calcd. for  $\text{C}_{22}\text{H}_{39}\text{O}_2$   $[\text{M}+\text{H}]^+$  335.2950; found 335.2958.

Following general procedure, **3gn'** was obtained as a yellowish solid (7.5:2.5:hexane:EtOAc) (7 mg, 0.03 mmol, 10%); **IR** (neat):  $\nu_{\max}/\text{cm}^{-1}$  2955, 2926, 2854, 1742, 1714, 1677, 1588, 1466, 1406, 1374, 1240, 1130, 1078, 1009, 721;  **$^1\text{H NMR}$**  (400 MHz,  $\text{CDCl}_3$ )  $\delta$  7.21 – 7.11 (m, 2H), 6.55 – 6.38 (m, 2H), 2.59 (t,  $J = 7.3$  Hz, 4H), 1.63 (m, 4H), 1.31 – 1.27 (m, 8H), 0.89 (t,  $J = 6.9$  Hz, 6H);  **$^{13}\text{C NMR}$**  (100 MHz,  $\text{CDCl}_3$ )  $\delta$  200.24 (2C), 138.91 (2C), 136.06 (2C), 41.43 (2C), 31.96 (2C), 24.12 (2C), 22.75 (2C), 14.19 (2C); **HRMS**  $m/z$  calcd for  $\text{C}_{16}\text{H}_{27}\text{O}_2$   $[\text{M}+\text{H}]^+$  251.2011; found 251.2010.

**Note:** When reaction was carried out in 0.3 mmol scale, we didn't get pure  $^1\text{H NMR}$  spectrum of homodimer of decyl vinyl ketone. So we repeated same reaction in 3 batches (0.3 mmol  $\times$  3), combined and purified to get pure spectra. homodimer of decyl vinyl ketone was obtained as a colourless solid, please see **3gg'** for data (7.5:2.5:hexane:EtOAc). Yield was calculated w.r.t. one batch (7 mg, 0.018 mmol, 6%). Overall yield from three batches (0.3 \* 3) = 21 mg, 0.054 mmol, 6%. **IR** (neat):  $\nu_{\max}/\text{cm}^{-1}$  2953, 2918, 2850, 1677, 1586, 1470, 1405, 1371, 1313, 1244, 1218, 1131, 1100, 906, 853, 750;  **$^1\text{H NMR}$**  (400 MHz,  $\text{CDCl}_3$ )  $\delta$  7.21 – 7.11 (m, 2H), 6.53 – 6.41 (m, 2H), 2.60 (t,  $J = 6.8$  Hz, 4H), 1.65– 1.58 (m, 4H), 1.27– 6.4 (m, 28H), 0.86 (t,  $J = 6.9$  Hz, 6H);  **$^{13}\text{C NMR}$**  (100 MHz,  $\text{CDCl}_3$ )  $\delta$  200.24 (2C), 138.91 (2C), 136.06 (2C), 41.43 (2C), 31.96 (2C), 29.63 (2C), 29.54 (2C), 29.48 (2C), 29.38 (2C), 29.30 (2C), 24.12 (2C), 22.75 (2C), 14.19 (2C); **HRMS**  $m/z$  calcd for  $\text{C}_{26}\text{H}_{47}\text{O}_2$   $[\text{M}+\text{H}]^+$  391.3576; found 391.3572.

**Compound 3qf** Following general procedure, **3qf** was purified by silica column chromatography (pet ether/EtOAc at a 8:2 ratio), obtained as a brownish solid (52 mg, 0.15 mmol, 52%). **IR** (neat):  $\nu_{\max}/\text{cm}^{-1}$  3354, 3047, 2928, 2866, 1729, 1680, 1579, 1467, 1421, 1366, 1344, 1241, 1215, 1173, 1107, 1078, 848, 723.  **$^1\text{H NMR}$**  (500 MHz,  $\text{CDCl}_3$ )  $\delta$  7.20 – 7.11 (m, 2H), 6.53 – 6.41 (m, 2H), 4.11 (q,  $J = 7.2$  Hz, 2H), 2.58 (m, 4H), 2.29 (t,  $J = 7.4$  Hz, 2H), 1.65 – 1.60 (m, 6H), 1.37 – 1.25 (m, 11H), 0.87 (t,  $J = 6.8$  Hz, 3H).  **$^{13}\text{C NMR}$**  (125 MHz,  $\text{CDCl}_3$ )  $\delta$  200.19, 199.78, 173.72, 139.02, 138.81, 136.15, 135.95, 60.34, 41.44, 41.05, 34.18, 31.65, 28.96, 28.70, 24.75, 24.07, 23.61, 22.56, 14.32, 14.10. **HRMS**(ESI-TOF)  $m/z$  calcd. for  $\text{C}_{20}\text{H}_{33}\text{O}_4$   $[\text{M}+\text{H}]^+$  337.2379; found 337.2377.

Homodimer of hexyl vinyl ketone was obtained as a minor product (12 mg, 0.042 mmol, 14%). For data please see **3af'**.

#### Synthesis of Ostopanic Acid, 5

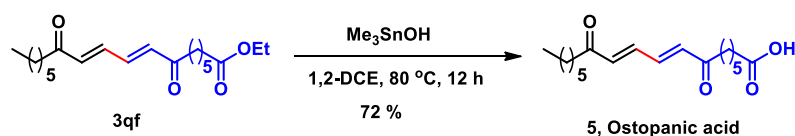

To a magnetically stirred solution of ester **3qf** (40 mg, 0.12 mmol) in 1,2-dichloroethane (3 mL) was added Me<sub>3</sub>SnOH (216 mg, 1.2 mmol) and the reaction mixture was stirred at 80 °C for 12 h. The solvent was removed by rotary evaporation and the mixture was diluted with EtOAc. Water (5 mL) was poured into mixture and the phases were separated and extracted with EtOAc (3 x 10 mL). The combined organic phases were dried over Na<sub>2</sub>SO<sub>4</sub>, evaporation of the solvent and purification of the residue on silica gel column chromatography using 40% EtOAc-hexane as an eluent furnished **ostopanic acid (5)** (27 mg, 72%) as a white solid. *R<sub>f</sub>* = 0.60 (EtOAc-hexane 3:7). **IR** (neat):  $\nu_{\text{max}}/\text{cm}^{-1}$  2925, 2854, 1708, 1679, 1465, 1404, 1367, 1254, 1128, 1107, 1078, 957, 722. **<sup>1</sup>H NMR** (500 MHz, CDCl<sub>3</sub>):  $\delta$  7.21 – 7.11 (m, 2H), 6.52 – 6.42 (m, 2H), 2.59 (t, *J* = 7.1 Hz, 2H), 2.57 (t, *J* = 7.3 Hz, 2H), 2.34 (t, *J* = 7.5 Hz, 2H), 1.67 – 1.59 (m, 6H), 1.39 – 1.28 (m, 8H), 0.86 (t, *J* = 6.8 Hz, 3H). **<sup>13</sup>C NMR** (125 MHz, CDCl<sub>3</sub>):  $\delta$  200.21, 199.73, 177.83, 139.07, 138.80, 136.17, 135.92, 41.44, 40.99, 33.52, 31.65, 28.96, 28.54, 24.49, 24.07, 23.56, 22.56, 14.09. **HRMS**(ESI-TOF) *m/z* calcd. for C<sub>18</sub>H<sub>28</sub>O<sub>4</sub>Na [M+Na]<sup>+</sup>: 331.1885; found 331.1889.

**Compound 3gm** Following general procedure, **3gm** was purified by silica column chromatography (pet ether/EtOAc at a 8:2 ratio), obtained as a yellowish solid (50 mg, 0.15 mmol, 50%). **IR** (neat):  $\nu_{\text{max}}/\text{cm}^{-1}$  3358, 2953, 2928, 2855, 1732, 1677, 1586, 1466, 1406, 1374, 1271, 1251, 1129, 1105, 1087, 862, 838. **<sup>1</sup>H NMR** (400 MHz, CDCl<sub>3</sub>)  $\delta$  7.22 – 7.10 (m, 2H), 6.55 – 6.36 (m, 2H), 4.11 (q, *J* = 7.2 Hz, 2H), 2.64 – 2.54 (m, 4H), 2.31 (t, *J* = 5.7 Hz, 2H), 1.67 – 1.61 (m, 6H), 1.65 – 1.21 (m, 11H), 0.85 (t, *J* = 6.8 Hz, 3H). **<sup>13</sup>C NMR** (100 MHz, CDCl<sub>3</sub>)  $\delta$  200.24, 199.50, 173.49, 139.14, 138.80, 136.20, 135.87, 60.43, 41.43, 40.87, 34.12, 31.73, 29.19, 24.50, 24.10, 23.96, 23.54, 23.03, 14.22, 14.13. **HRMS**(ESI-TOF) *m/z* calcd. for C<sub>20</sub>H<sub>33</sub>O<sub>4</sub> [M+H]<sup>+</sup> 337.2379; found 337.2376.

Following general procedure, **3gm'** was obtained as a colourless solid (7.5:2.5:hexane:EtOAc) (11 mg, 0.036 mmol, 12%); **IR** (neat):  $\nu_{\text{max}}/\text{cm}^{-1}$  3355, 3047, 2953, 2954, 2887, 2855, 1714, 1677, 1585, 1469, 1405, 1372, 1323, 1265, 1229, 1130, 1088, 1058, 801, 738. **<sup>1</sup>H NMR** (500 MHz, CDCl<sub>3</sub>)  $\delta$  7.21 – 7.10 (m, 2H), 6.53 – 6.39 (m, 2H), 2.62 (t, *J* = 6.8 Hz, 4H), 1.63 – 1.10 (m, 4H), 1.30 – 1.24 (m, 16H), 0.86 (t, *J* = 6.9 Hz, 6H); **<sup>13</sup>C NMR** (100 MHz, CDCl<sub>3</sub>)  $\delta$  200.23 (2C), 138.90 (2C), 136.05 (2C), 41.42 (2C), 31.73 (2C), 29.19 (2C), 29.19 (2C), 24.12 (2C), 22.67 (2C), 14.14 (2C); **HRMS** *m/z* calcd. for C<sub>20</sub>H<sub>35</sub>O<sub>2</sub> [M+H]<sup>+</sup> 307.2637; found 307.2628.

#### Synthesis of JA, 6

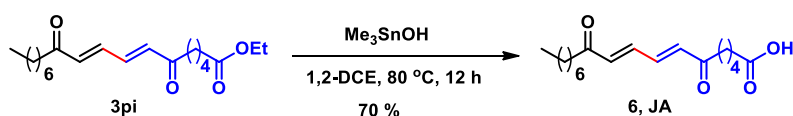

To a magnetically stirred solution of ester **3gm** (40 mg, 0.11 mmol) in 1,2-dichloroethane (3 mL) was added Me<sub>3</sub>SnOH (207 mg, 1.18 mmol) and the reaction mixture was stirred at 80 °C for 12 h. The solvent was removed by rotary evaporation and the mixture was diluted with EtOAc. Water (5 mL) was poured into mixture and the phases were separated and extracted with EtOAc (3 x 10 mL). The combined organic phases were dried over Na<sub>2</sub>SO<sub>4</sub>, evaporation of the solvent and purification of the residue on silica gel column chromatography using 40% EtOAc-hexane as eluent furnished **JA (6)** (24 mg, 70%) as a white solid. *R<sub>f</sub>* = 0.60 (EtOAc-hexane 3:7). **IR** (neat):  $\nu_{\text{max}}/\text{cm}^{-1}$  3046, 2925, 2854, 1708, 1680, 1580, 1464, 1404, 1376, 1313, 1266, 1128, 1104, 1083, 953, 723. **<sup>1</sup>H NMR** (500 MHz, CDCl<sub>3</sub>):  $\delta$  7.21 – 7.11 (m, 2H), 6.54 – 6.41 (m, 2H), 2.60 (m, 4H), 2.37 (t, *J* = 6.9 Hz, 2H), 1.68 – 1.60 (m, 6H), 1.29 – 1.25 (m, 8H), 0.86 (t, *J* = 6.9 Hz, 3H). **<sup>13</sup>C NMR** (125 MHz, CDCl<sub>3</sub>):  $\delta$  200.28, 199.41, 178.41, 139.22, 138.78, 136.25, 135.83, 41.45, 40.81, 33.65, 31.74, 29.20, 29.14, 24.26, 24.16, 23.26, 22.68, 14.15. **HRMS**(ESI-TOF) *m/z* calcd. for C<sub>18</sub>H<sub>28</sub>O<sub>4</sub>Na [M+Na]<sup>+</sup>: 331.1885; found: 331.1883.

#### Synthesis of southern part (C1-C13) of macrolactin-T, 7

Following general procedure, **7** was purified by silica column chromatography (pet ether/EtOAc at a 8:2 ratio), obtained as a colourless solid (61 mg, 0.20 mmol, 68%).  $[\alpha]_{\text{D}}^{28} = +10.0$  (*c* = 0.3, CHCl<sub>3</sub>). **IR** (neat):  $\nu_{\text{max}}/\text{cm}^{-1}$  3442, 3024, 2927, 2914, 2887, 1765, 1637, 1498, 1341, 1289, 1158, 1071, 954, 827, 741. **<sup>1</sup>H NMR** (500 MHz, CDCl<sub>3</sub>)  $\delta$  8.01 (d, *J* = 8.4 Hz, 2H), 7.57 – 7.53 (t, *J* = 8.5 Hz, *J* = 1H), 7.43 (t, *J* = 7.8 Hz, 2H), 7.14 – 7.07 (m, 2H), 6.46 – 6.37 (m, 2H), 5.19 (m, 1H), 2.75 (t, *J* = 6.2 Hz, 2H), 2.29 (s, 3H), 2.07 – 2.02 (m, 2H), 1.37 (d, *J* = 6.3 Hz, 3H). **<sup>13</sup>C NMR** (125 MHz, CDCl<sub>3</sub>)  $\delta$  198.78, 197.73, 166.14, 139.62, 139.09, 136.91, 135.90, 133.04, 129.62 (3C), 128.44 (2C), 70.97, 37.26, 30.19, 27.92, 20.36. **HRMS**(ESI-TOF) *m/z* calcd. for C<sub>18</sub>H<sub>21</sub>O<sub>4</sub> [M+H]<sup>+</sup> 301.1440; found 301.1443.

Homodimer of methyl vinyl ketone was obtained as a minor product (5.0 mg, 0.039 mmol, 13%). For data please see **3aa'**.

## 5. <sup>1</sup>H and <sup>13</sup>C NMR Spectra of Compounds 3

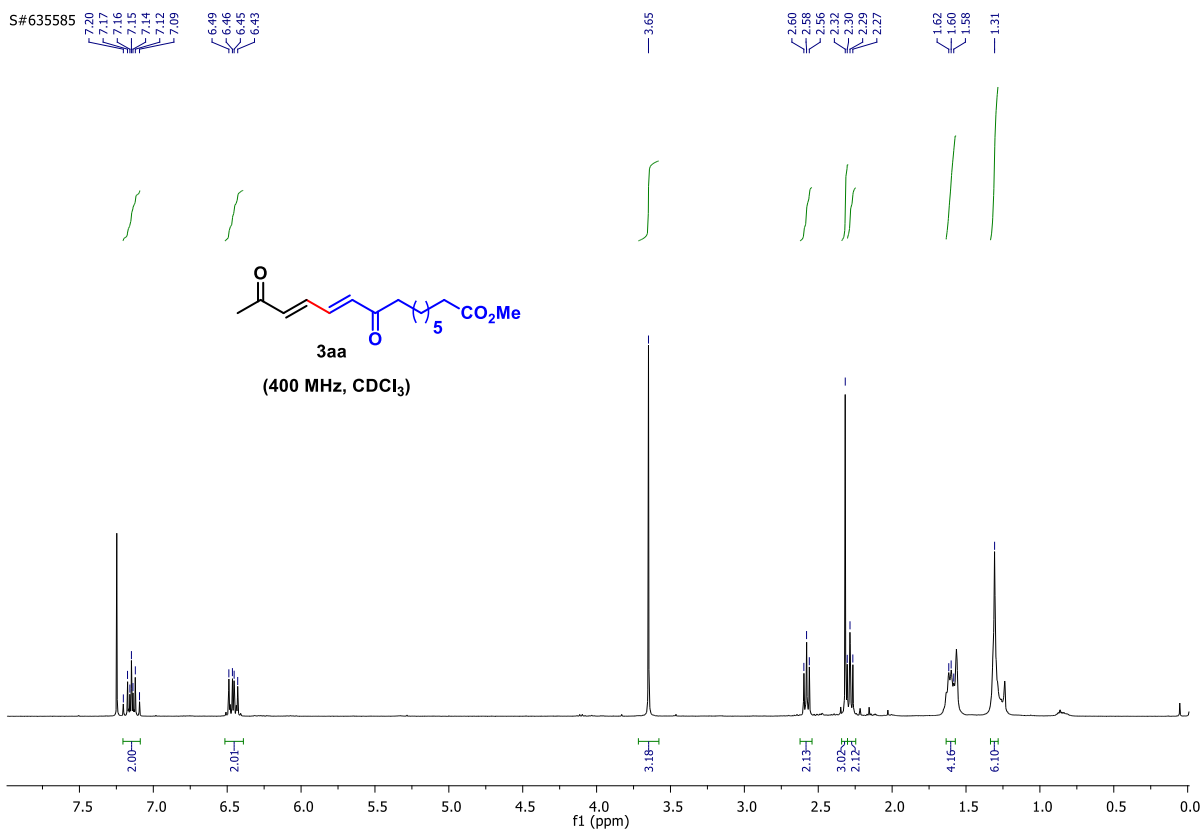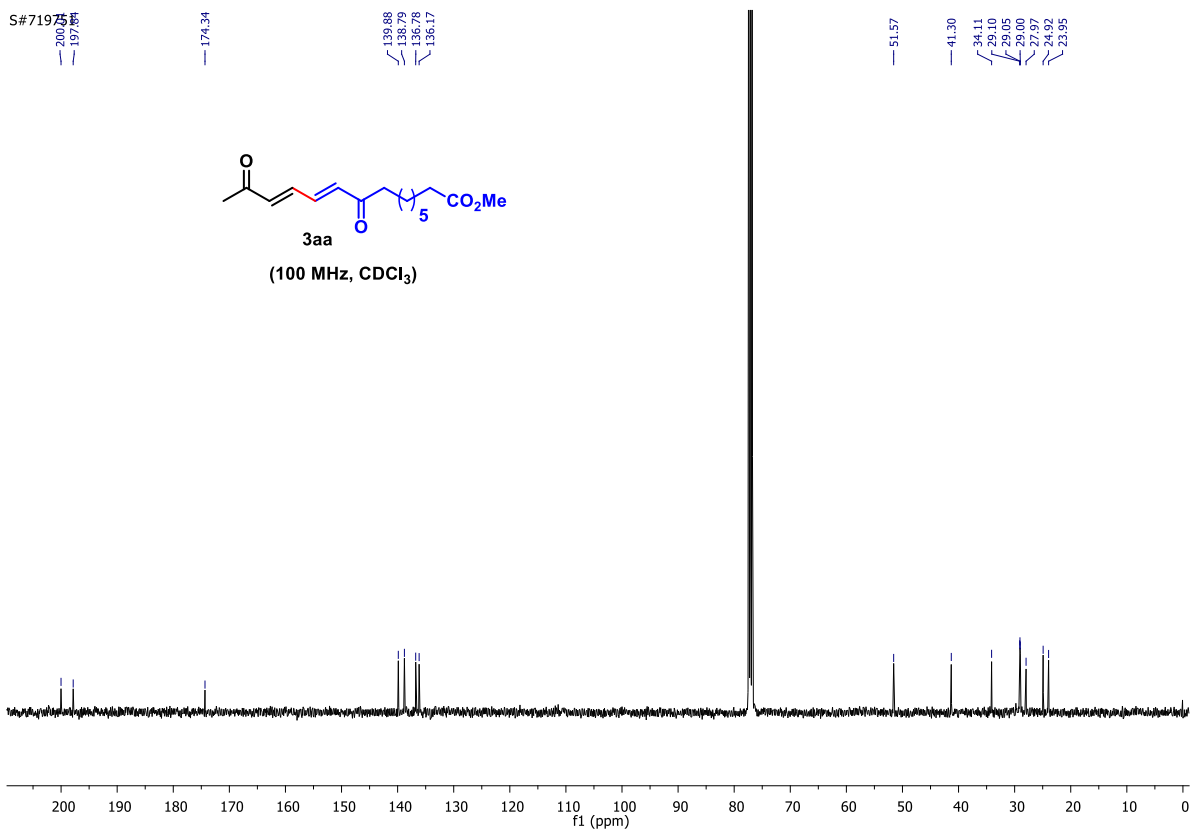



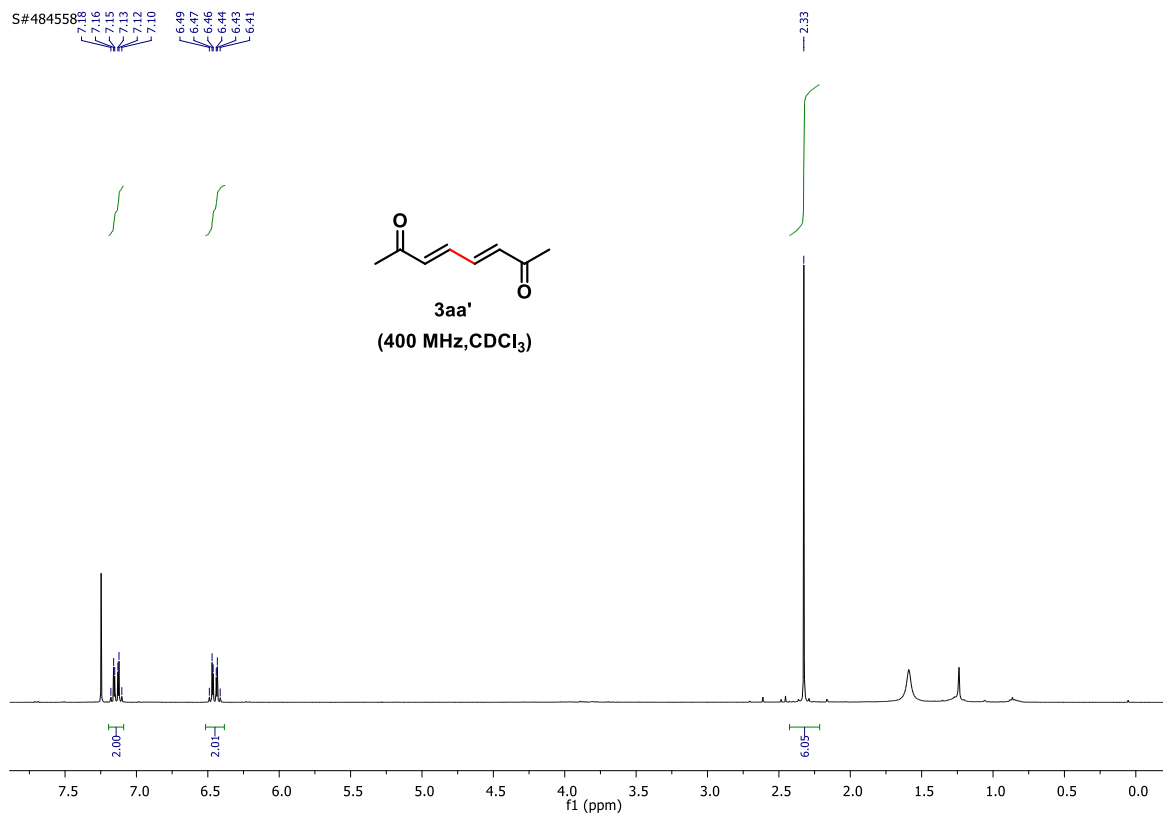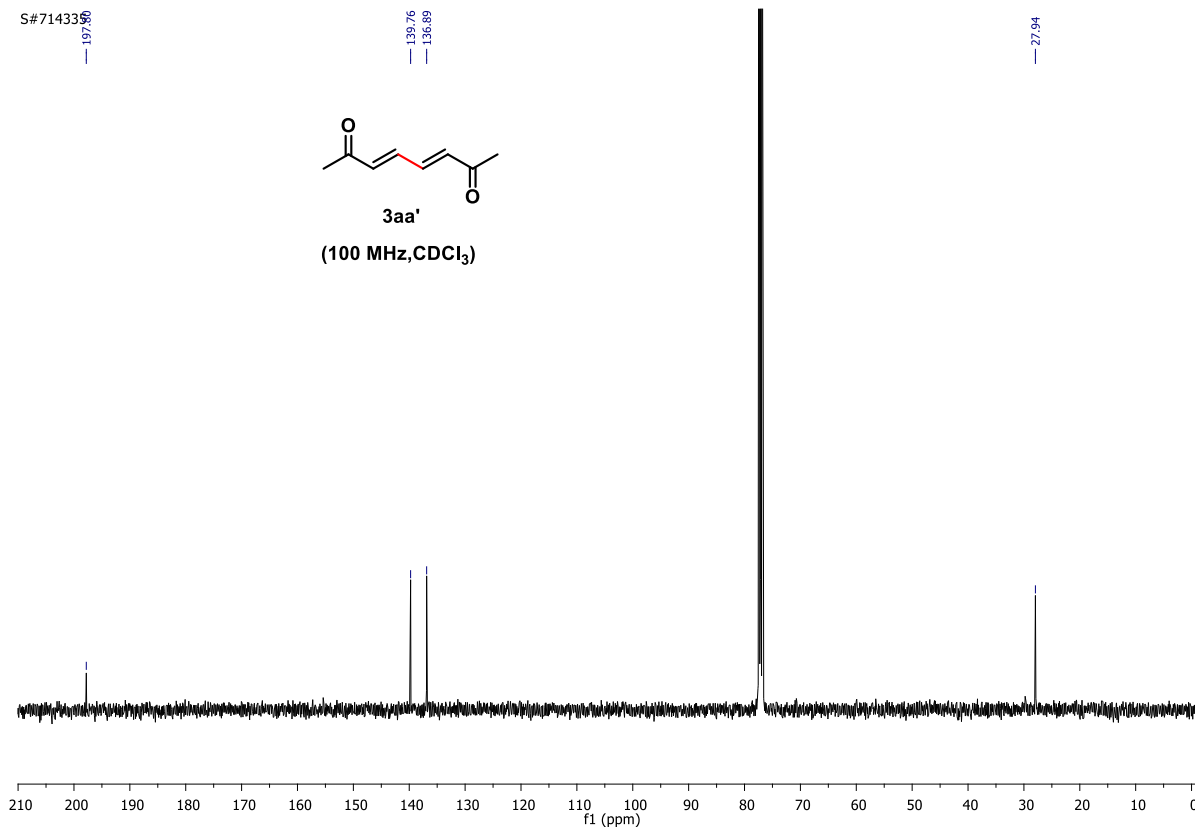

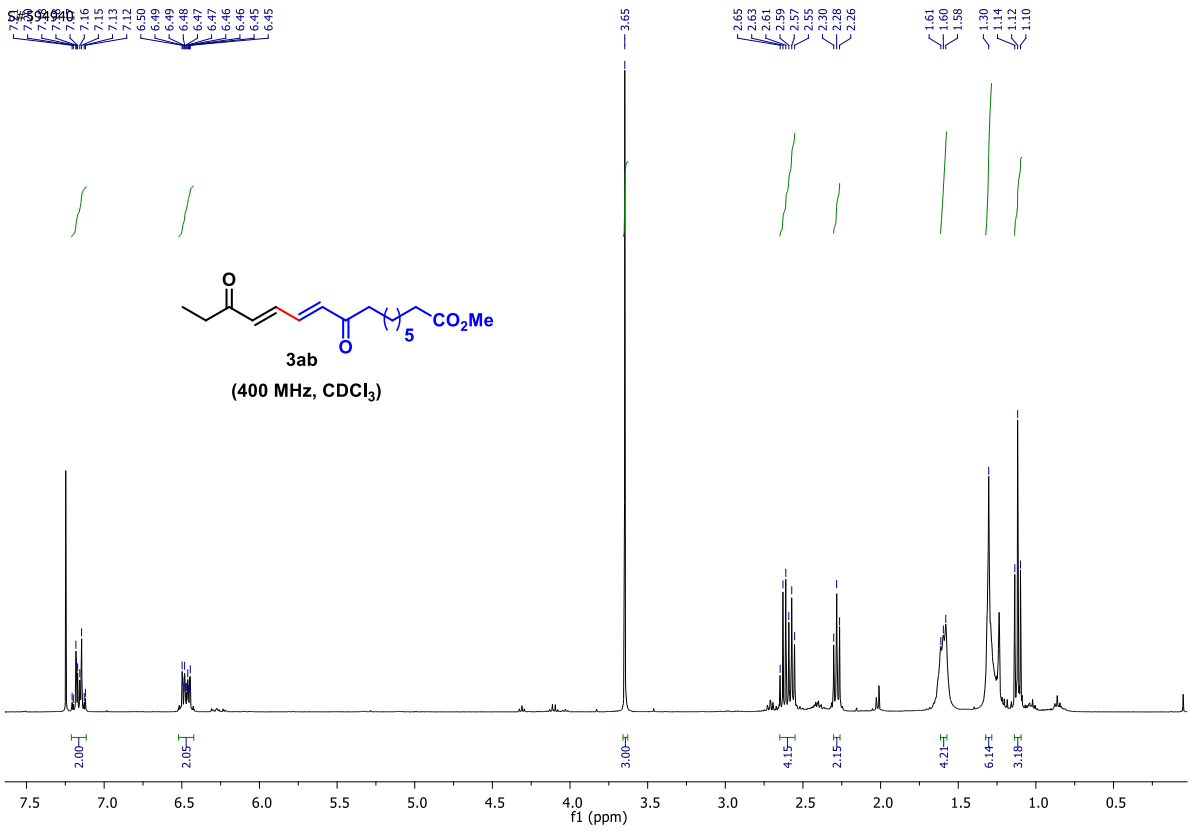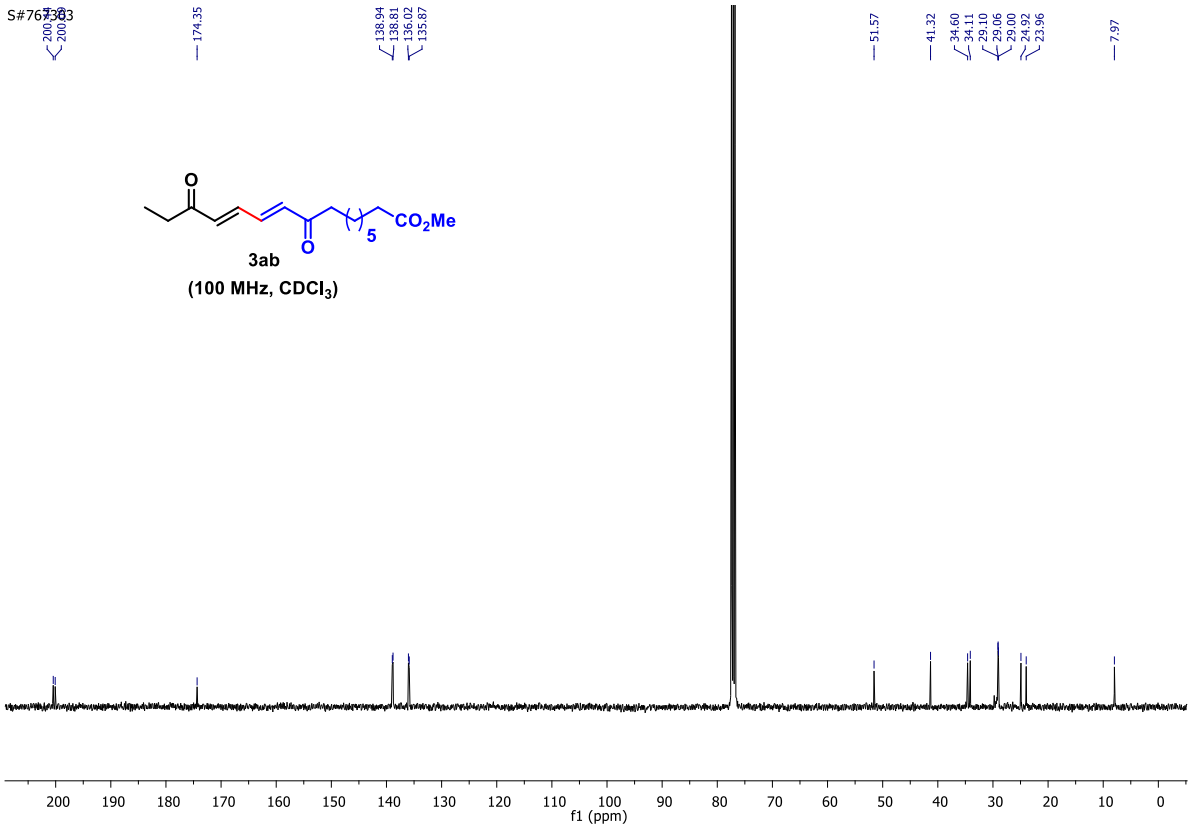

S#341516

7.21  
7.19  
7.15  
7.13

6.51  
6.49  
6.43

2.64  
2.61  
2.61  
2.59

1.13  
1.11  
1.09

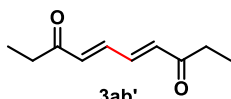

3ab'

(400 MHz, CDCl<sub>3</sub>)

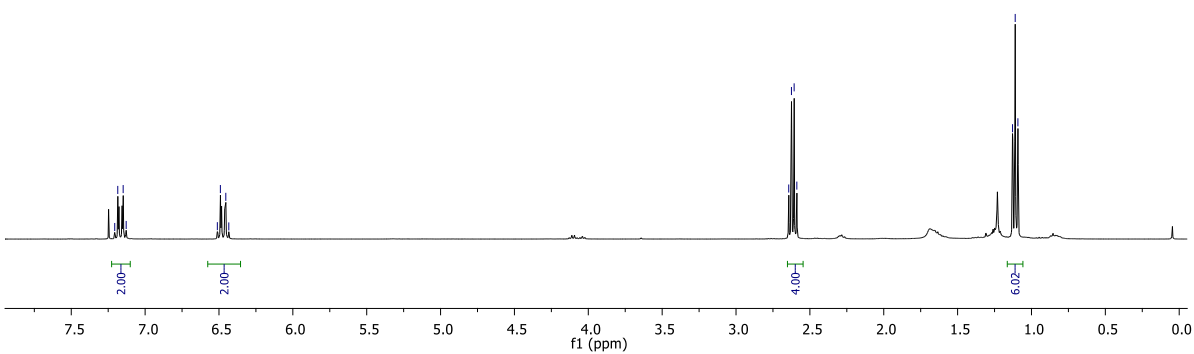

S#61486

200.8

138.83  
135.82

34.58

7.96

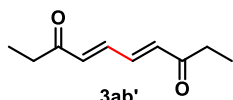

3ab'

(100 MHz, CDCl<sub>3</sub>)

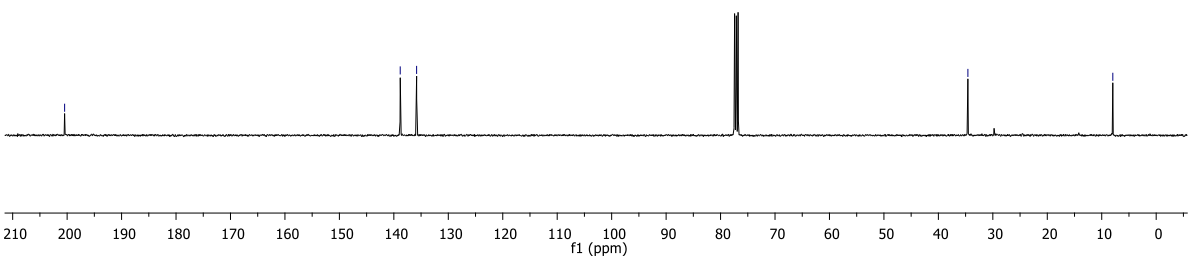

S#537339  
single\_pulse

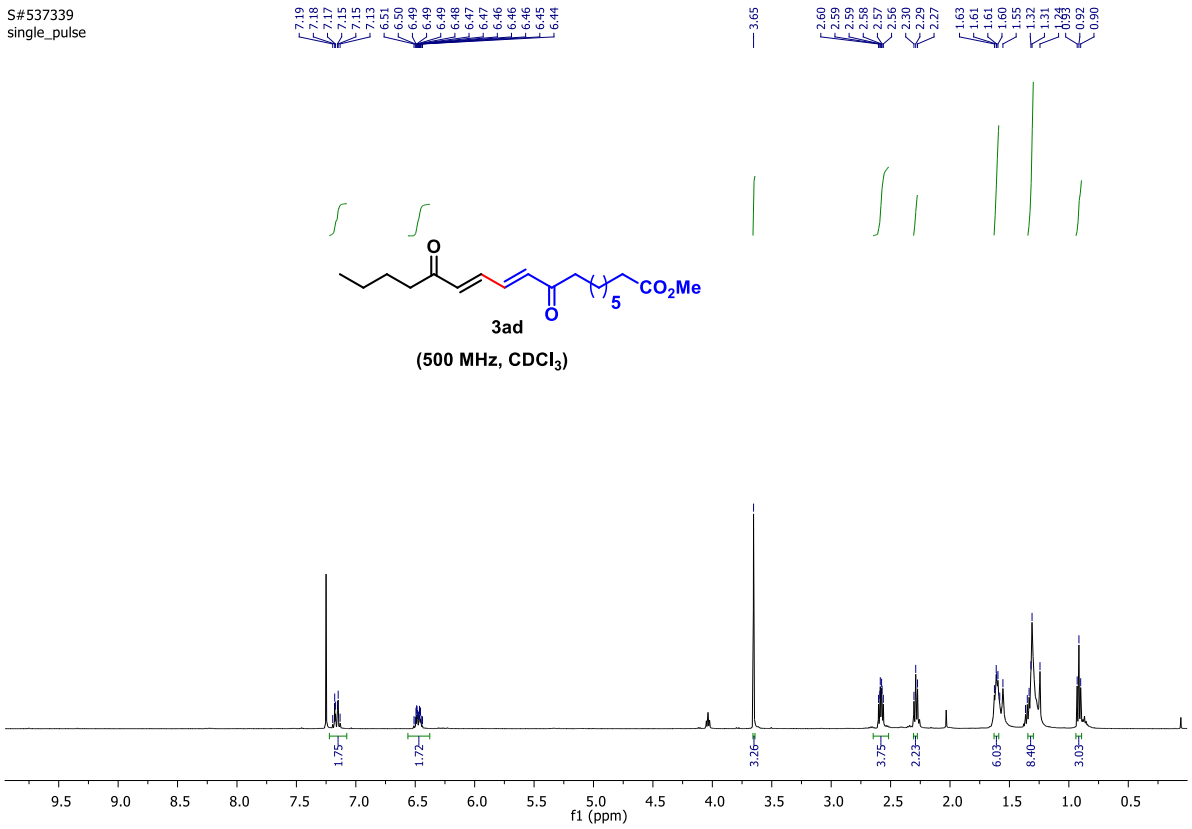

S#651219

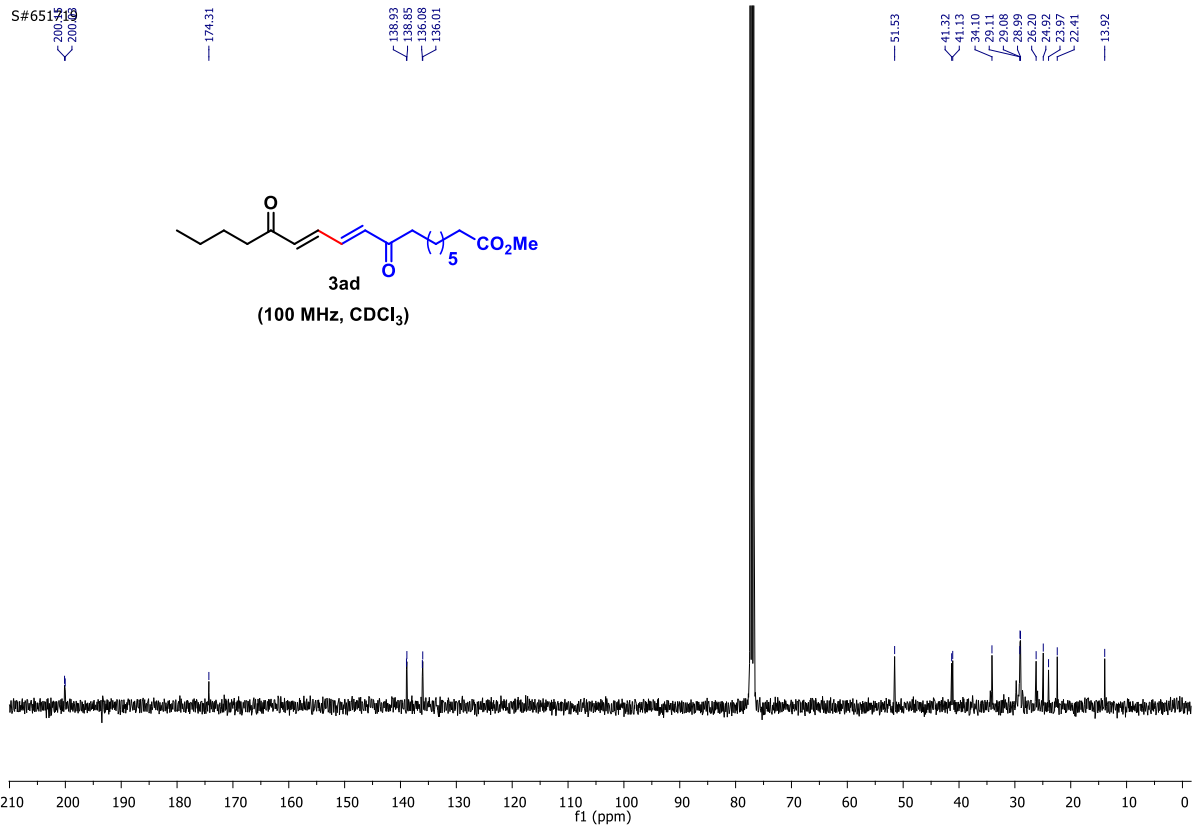

SAI20A

7.20  
7.18  
7.17  
7.16  
7.15  
7.13  
6.51  
6.49  
6.49  
6.46  
6.45  
6.45

2.60  
2.59  
2.57

1.64  
1.63  
1.61  
1.59  
1.36  
1.35  
1.33  
0.93  
0.91  
0.90

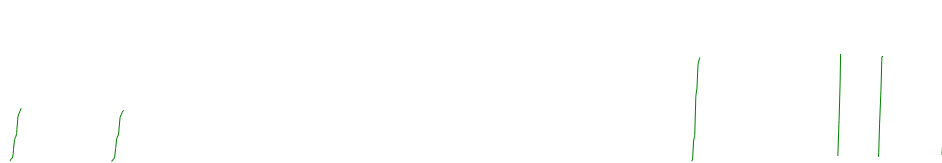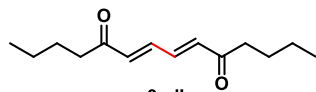

**3ad'**  
(500 MHz, CDCl<sub>3</sub>)

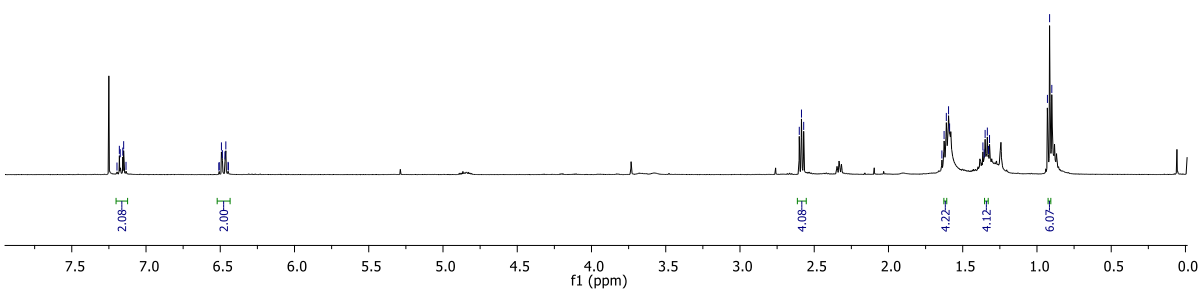

SAI20B

200.18

138.90  
136.05

41.11

26.20

22.40

13.91

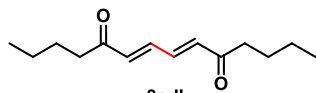

**3ad'**  
(125 MHz, CDCl<sub>3</sub>)

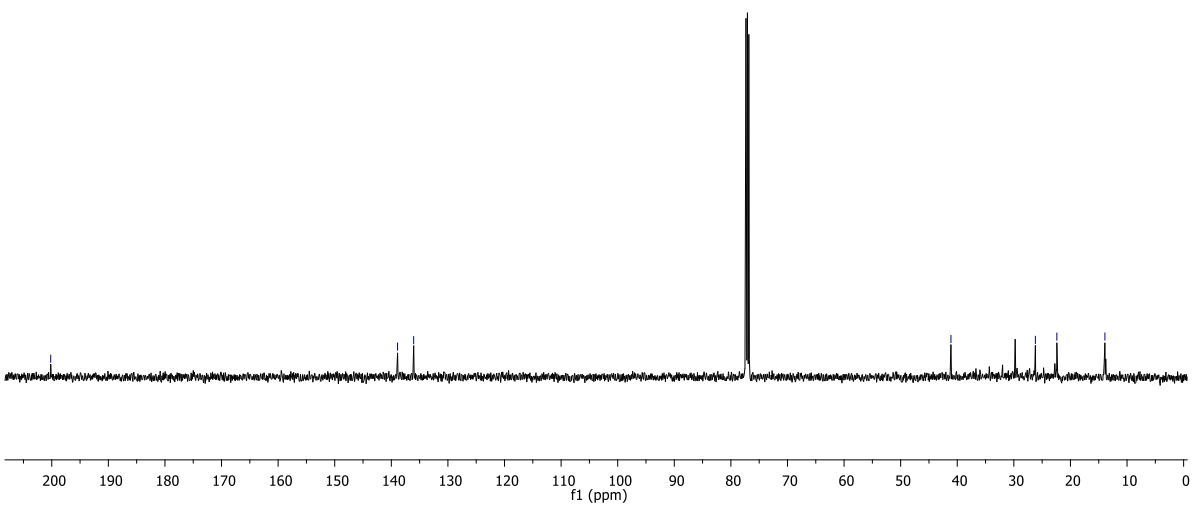

AN2001RE

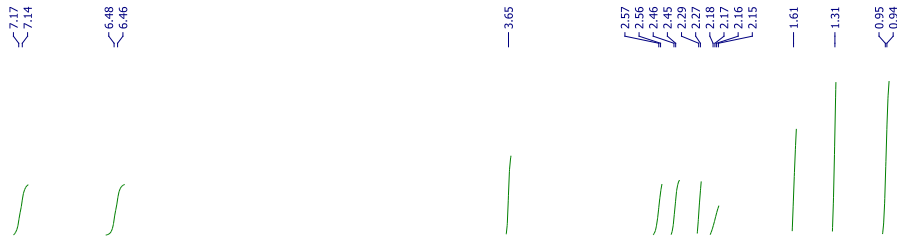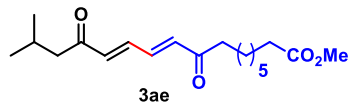

(400 MHz, CDCl<sub>3</sub>)

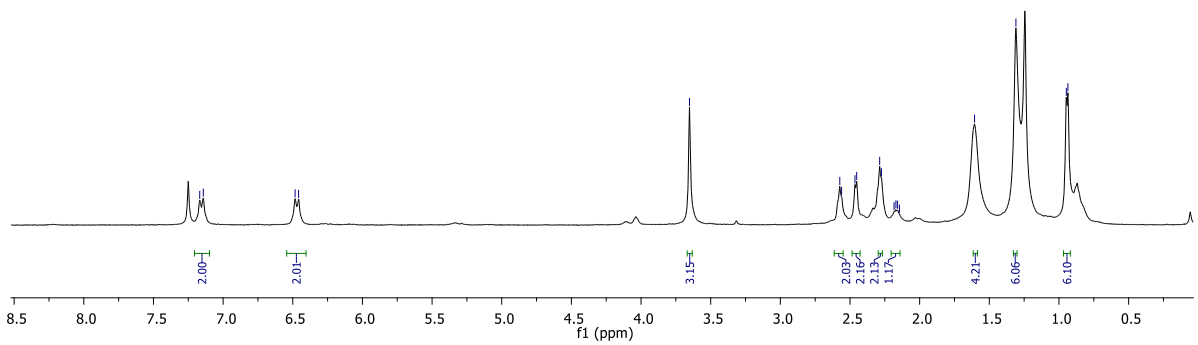

AN2001RE

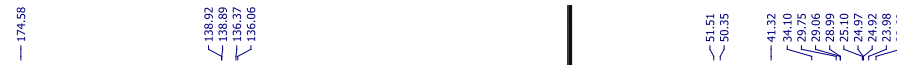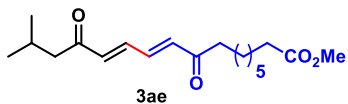

(100 MHz, CDCl<sub>3</sub>)

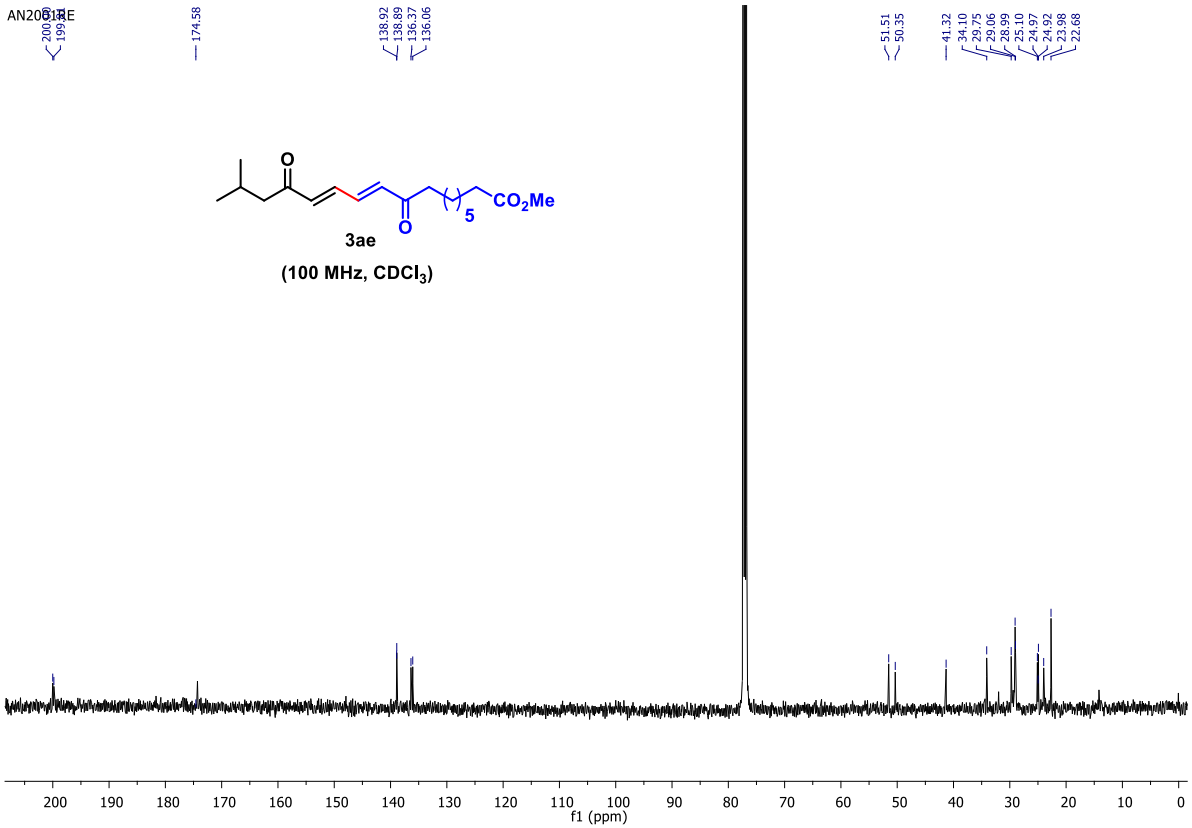

VK803PA

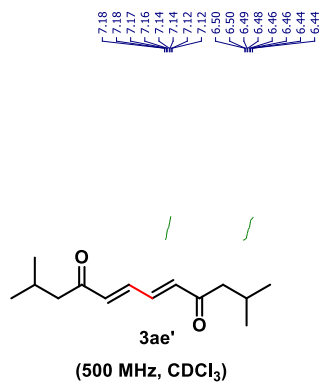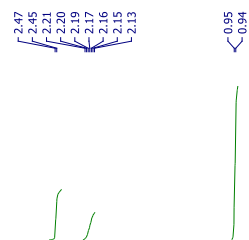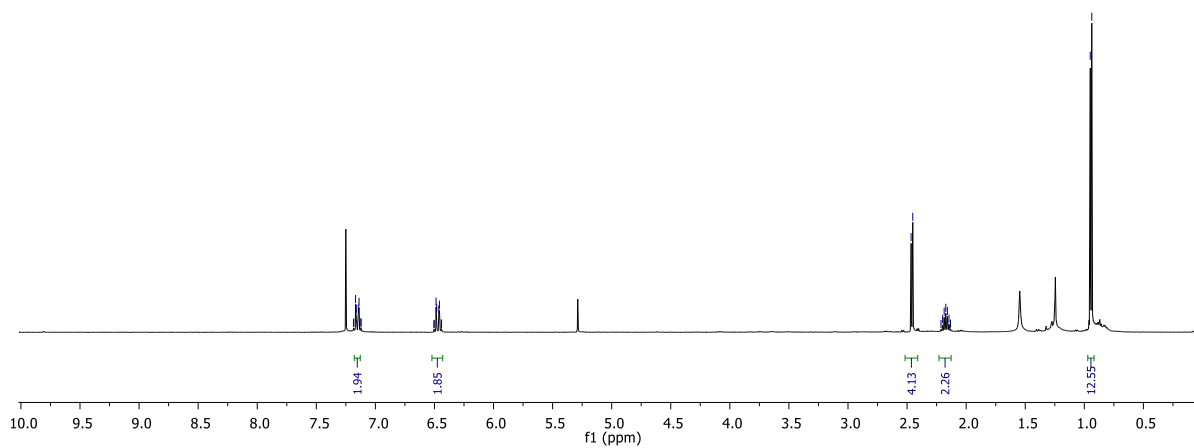

VK803PA

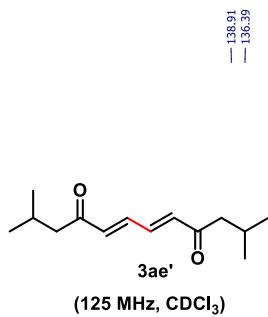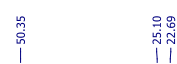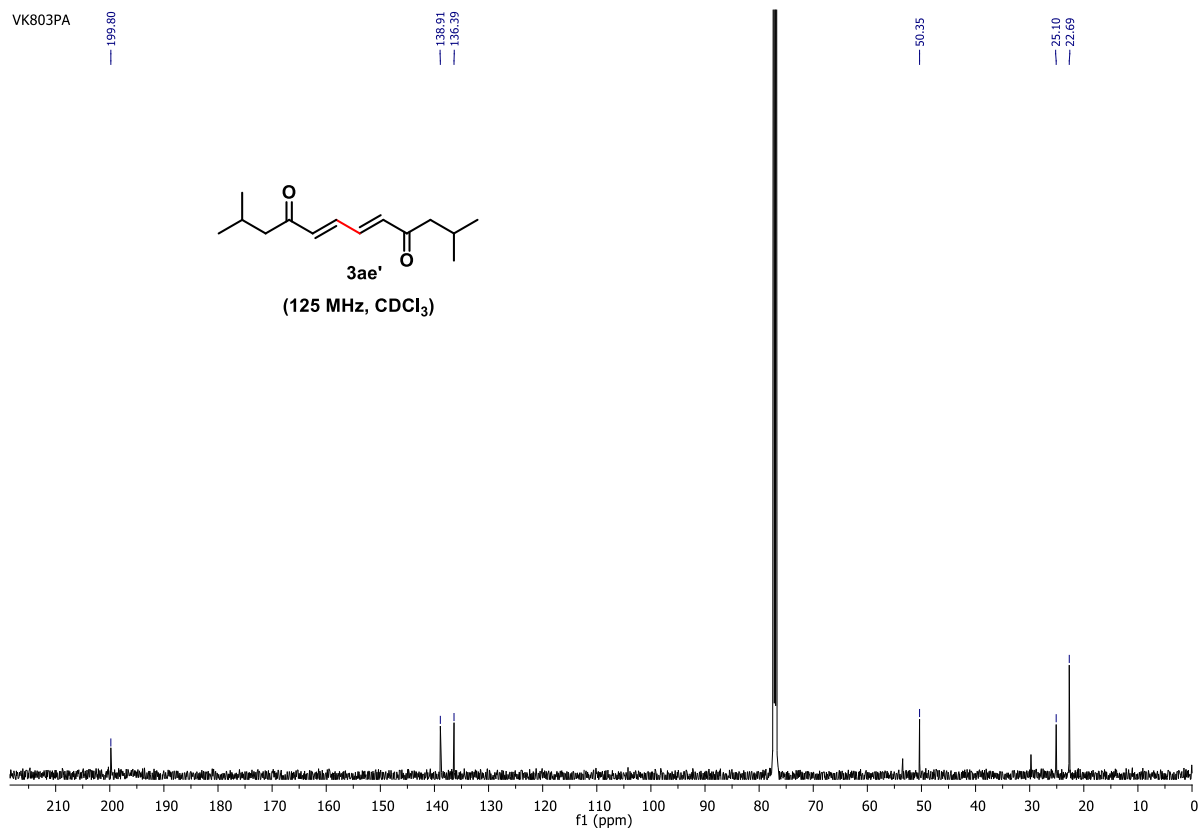

S#560768

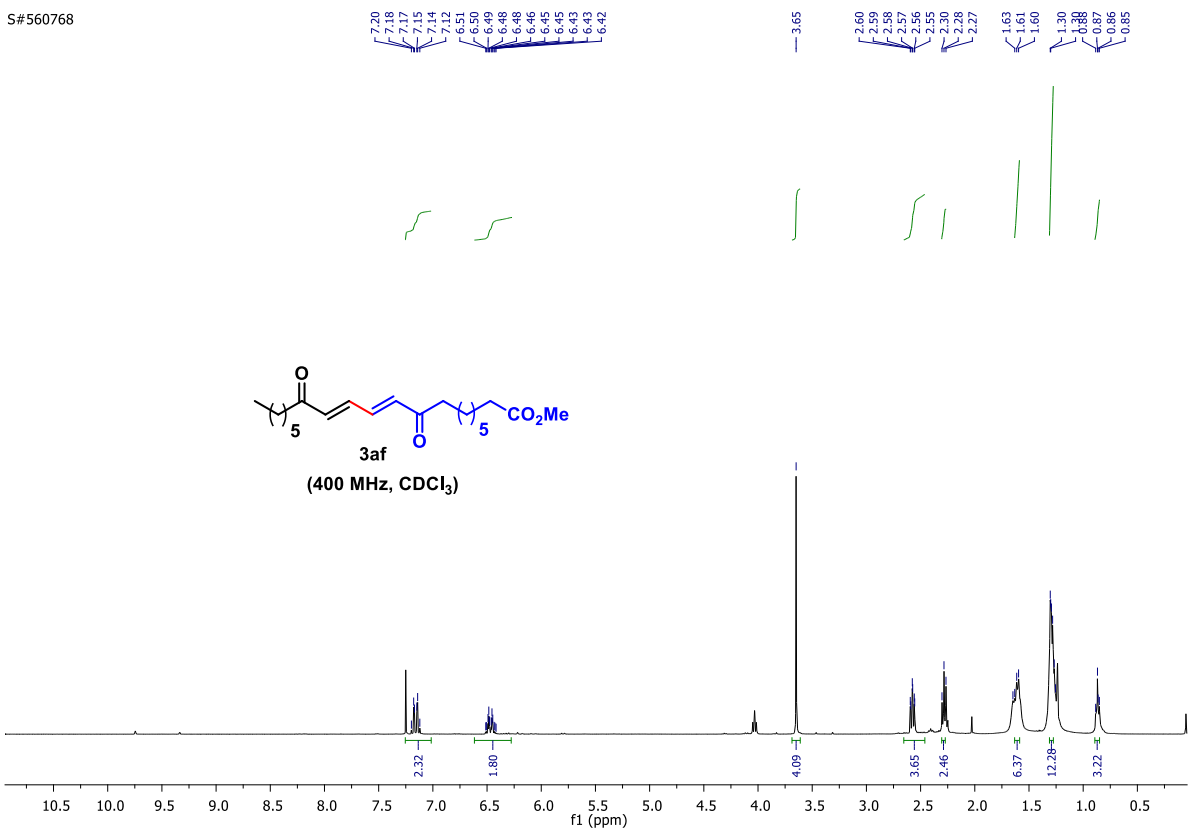

S#725188

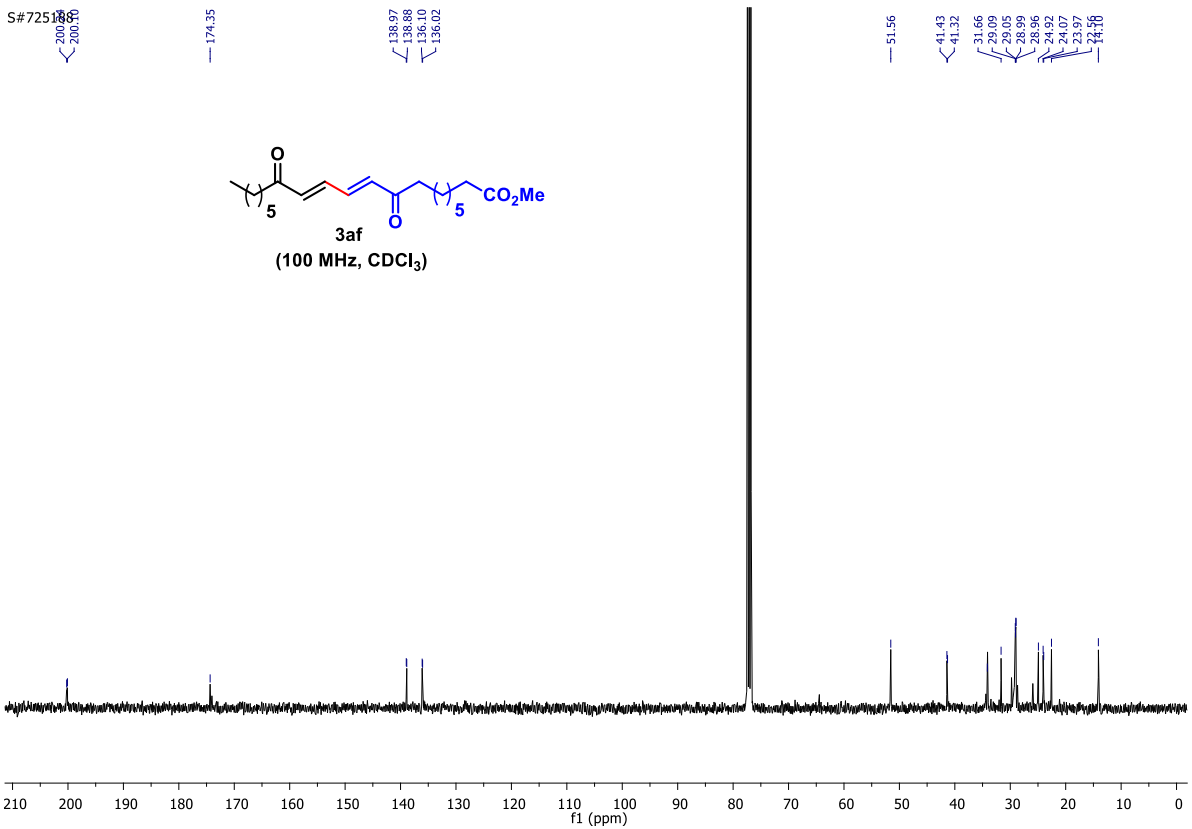



S#638541

7.20  
7.18  
7.17  
7.15  
7.14  
7.12  
6.51  
6.49  
6.48  
6.46  
6.45  
6.43

2.59  
2.58  
2.56

1.65  
1.63  
1.62  
1.60  
1.30  
1.29  
1.28  
0.87  
0.85

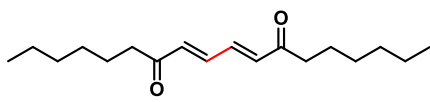

3af'  
(400 MHz, CDCl<sub>3</sub>)

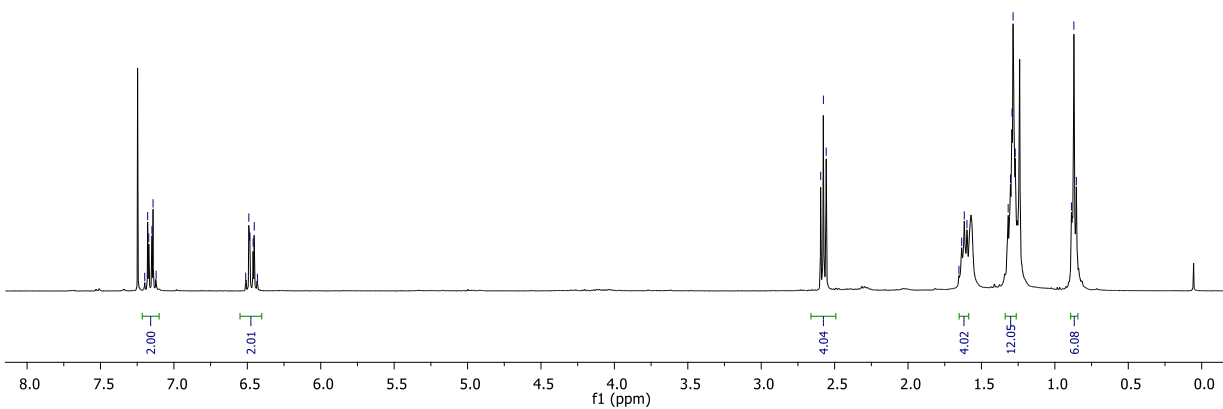

S#689660

200.60

138.90  
136.06

41.43

31.66  
28.96  
24.08  
22.56

14.10

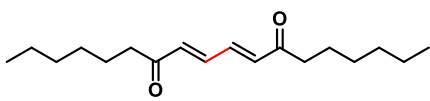

3af'  
(100 MHz, CDCl<sub>3</sub>)

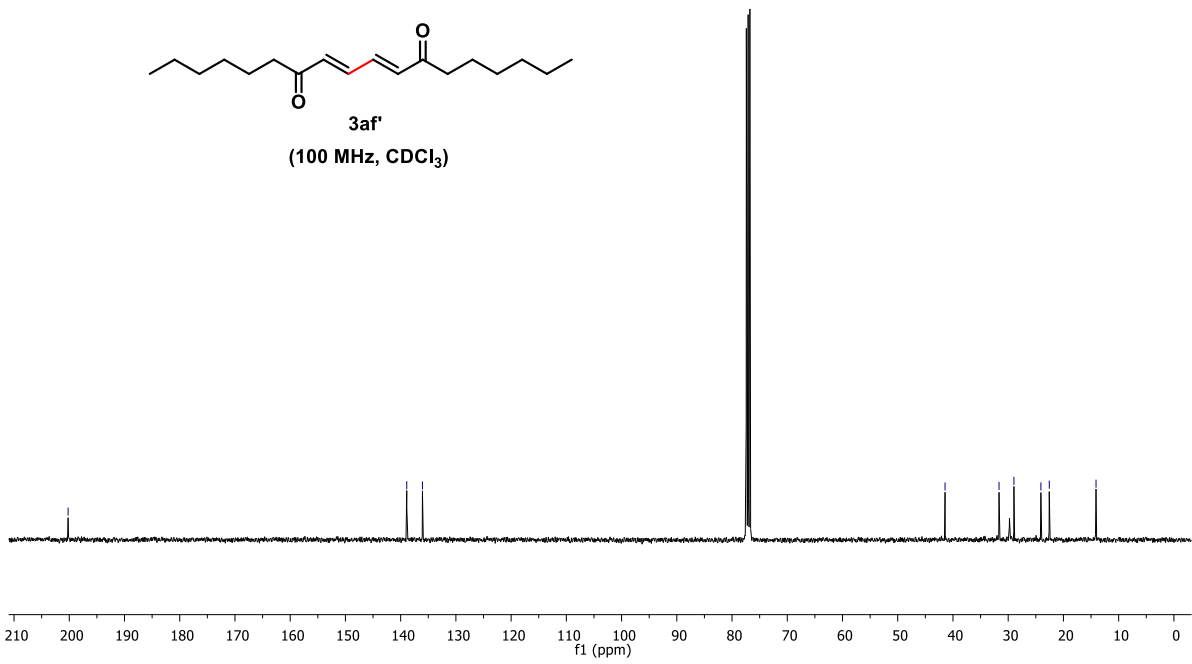

S#336887  
single\_pulse

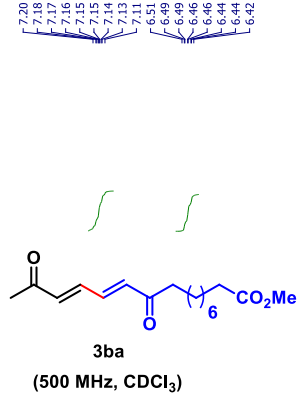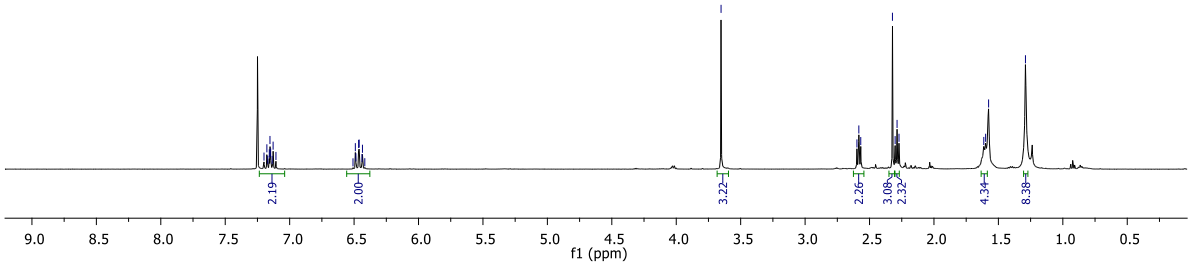

S#468072  
single pulse decoupled gated NOE

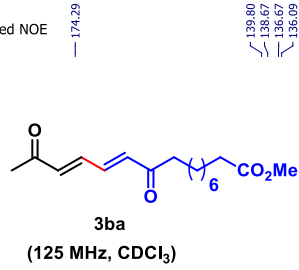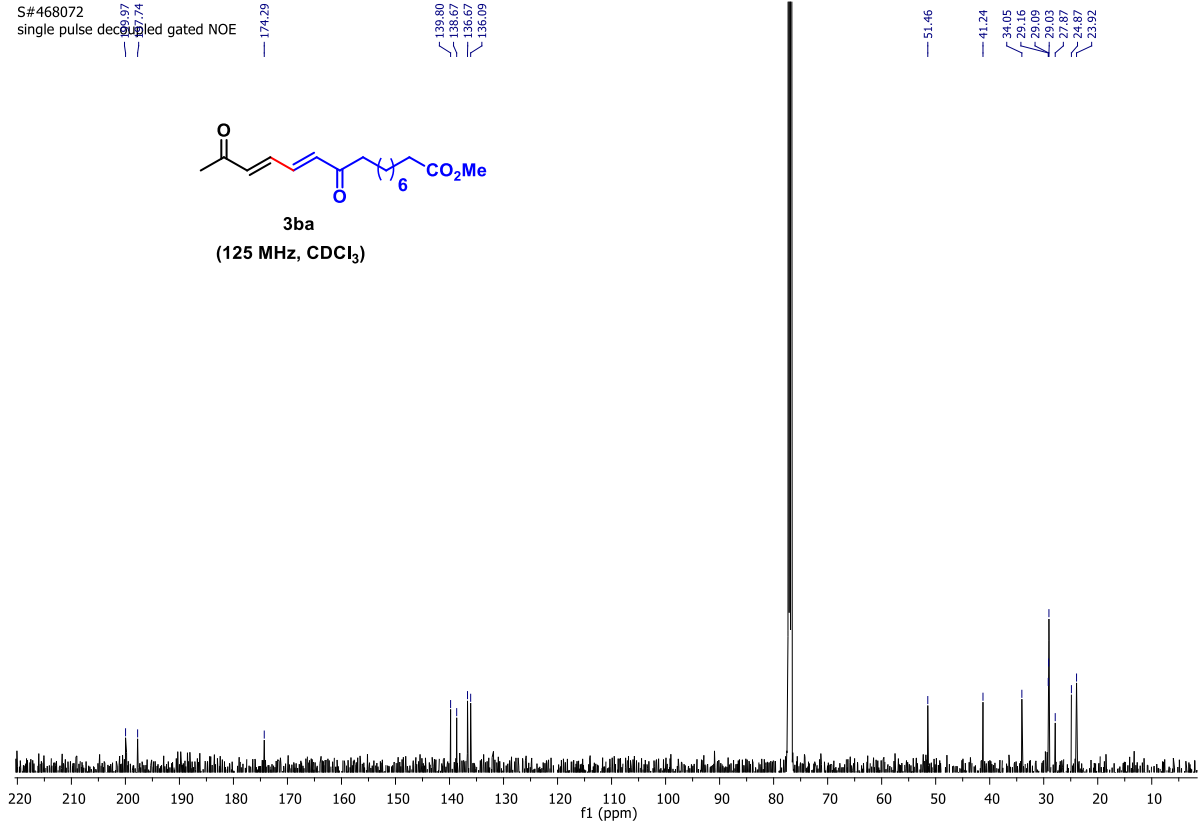

S#350678  
single\_pulse

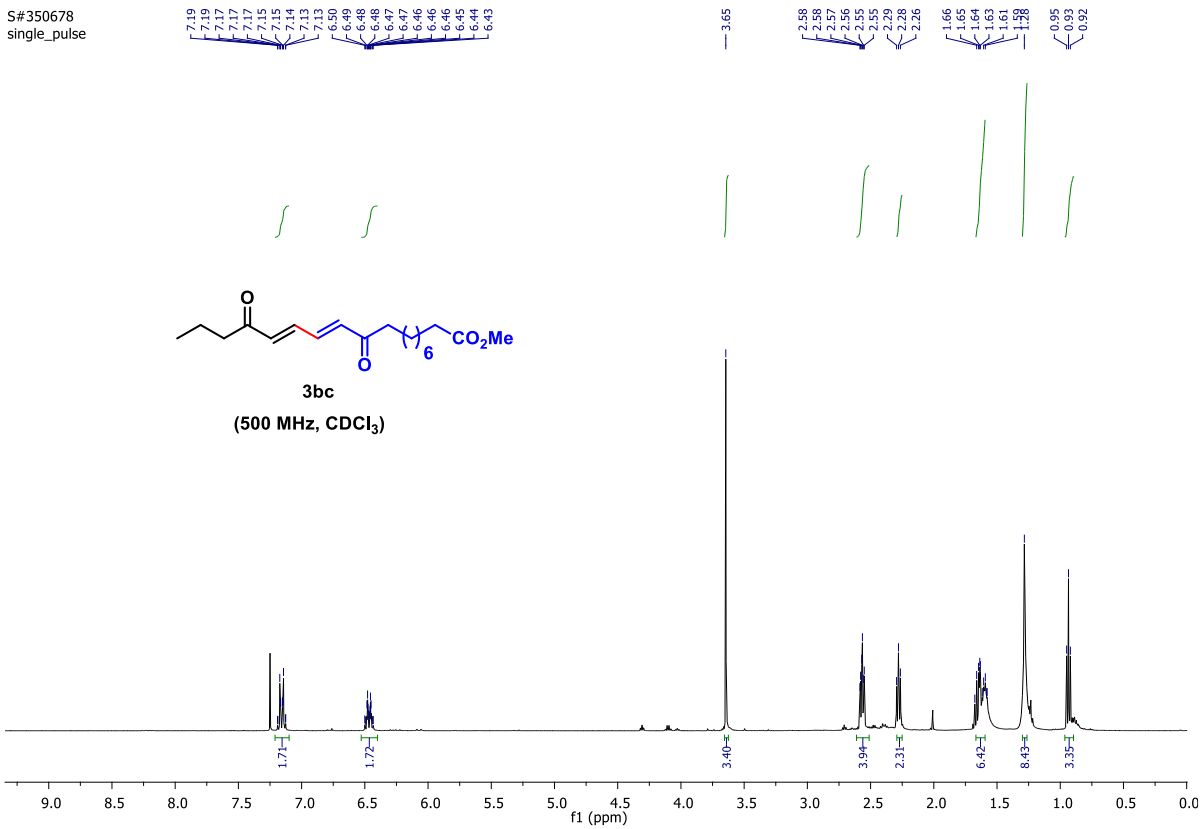

S#457674  
single pulse decoupled gated NOE

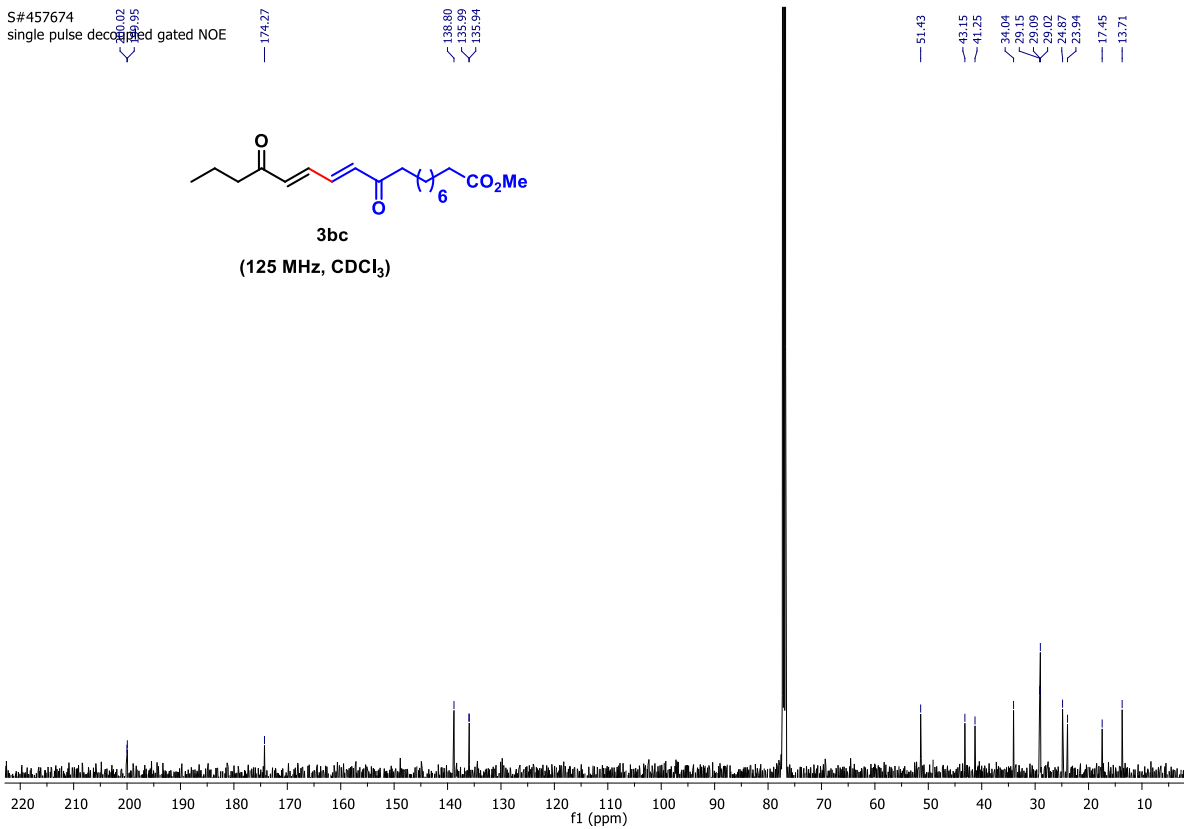

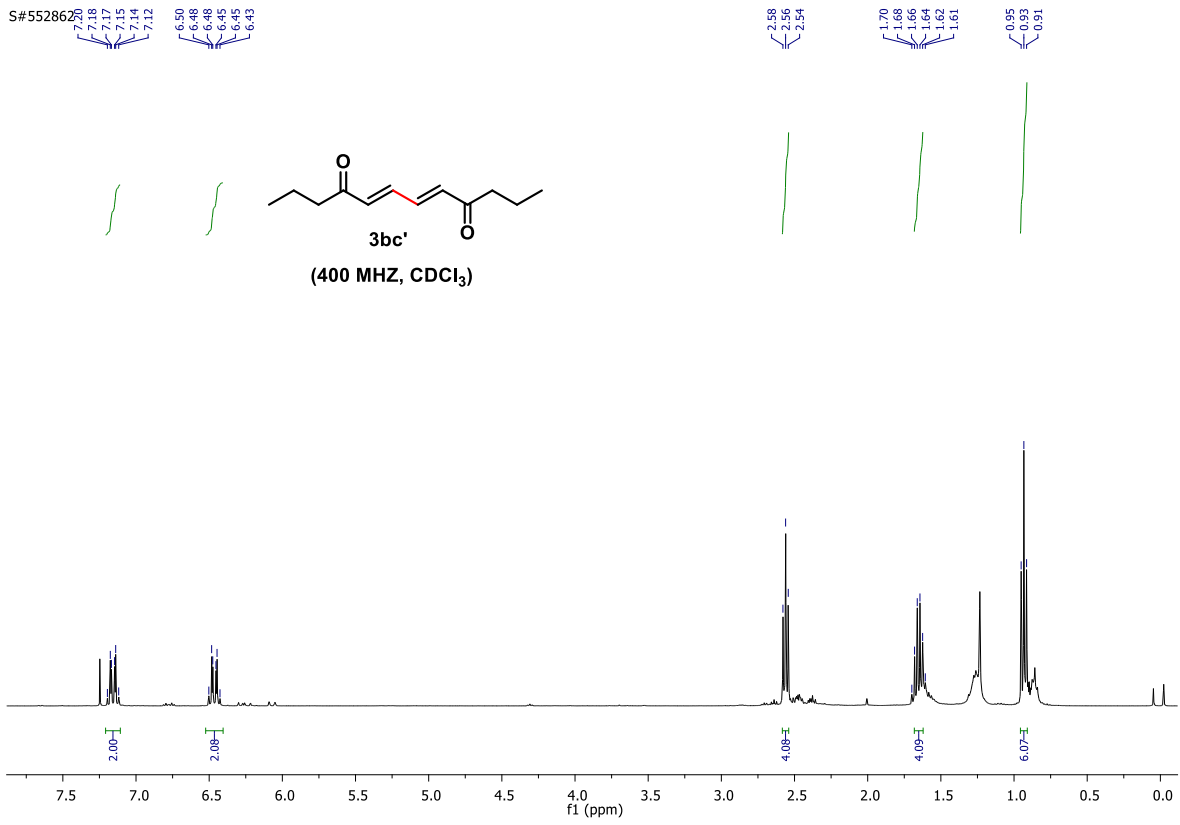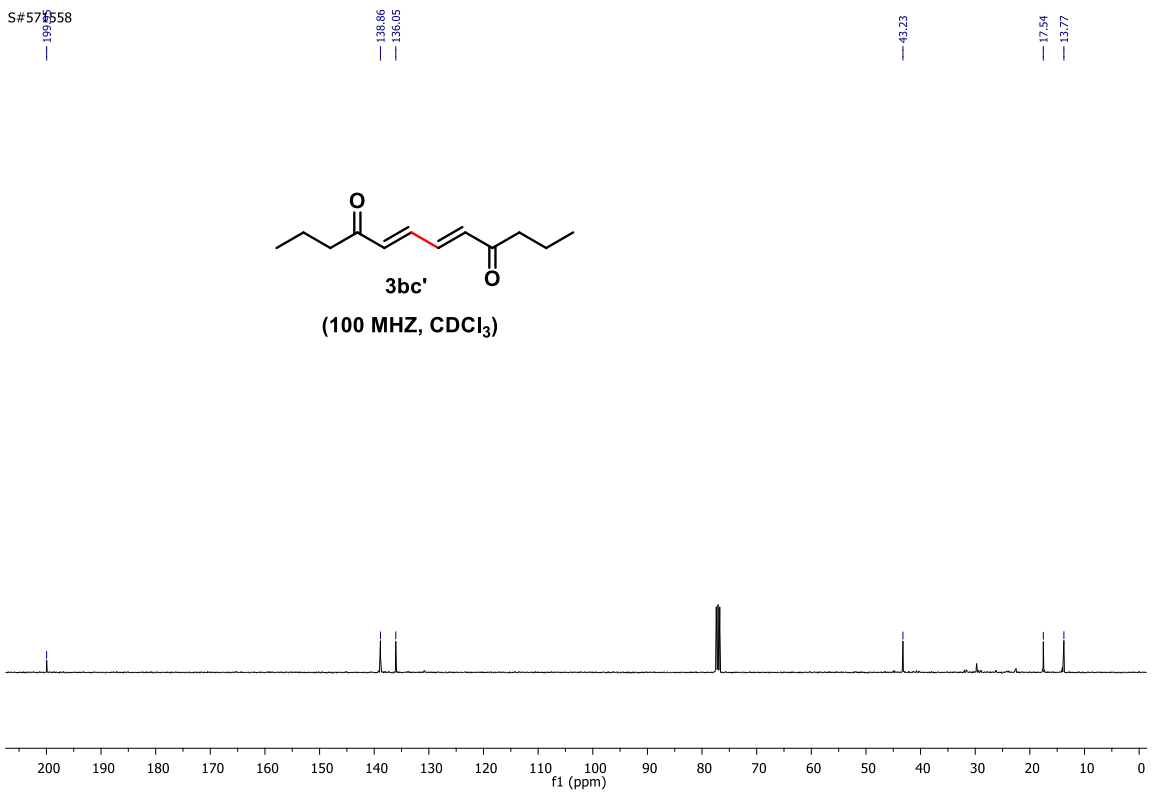

S#347553  
single\_pulse

7.19  
7.18  
7.17  
7.16  
7.15  
7.14  
7.13  
7.12  
6.50  
6.49  
6.48  
6.47  
6.45  
6.44

3.65  
2.59  
2.57  
2.56  
2.46  
2.45  
2.30  
2.28  
2.27  
2.19  
2.18  
2.16  
2.15  
2.14  
2.13  
1.61  
1.59  
1.29  
0.94  
0.93

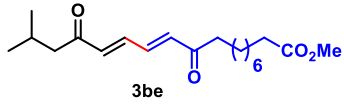

(500 MHz, CDCl<sub>3</sub>)

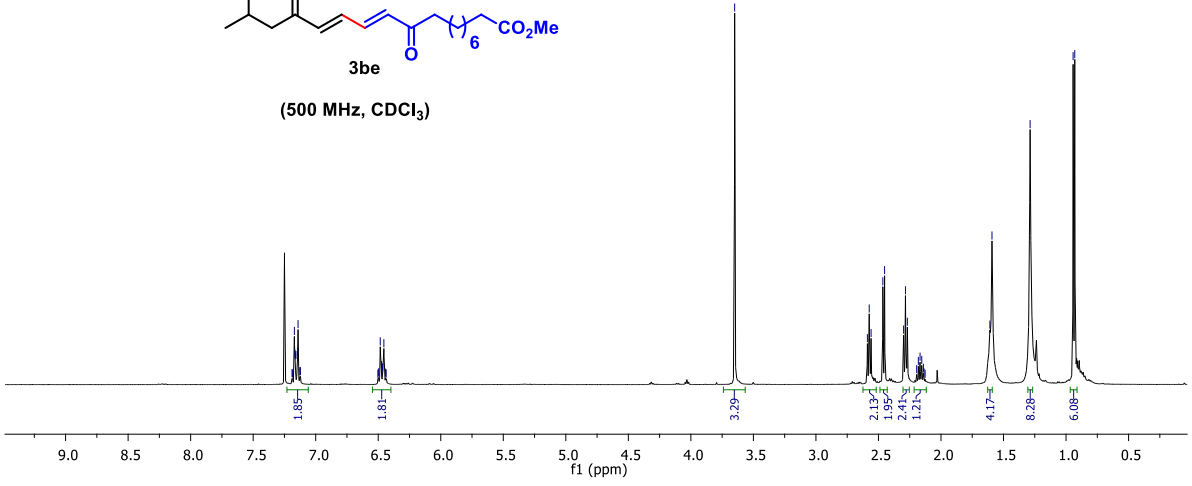

S#454209  
single pulse decoupled gated NOE

20.04  
19.78

174.29

138.84  
136.27  
135.99

51.45  
50.24

41.27

34.04  
29.16  
29.10  
29.03

25.00  
24.84  
24.84  
22.60

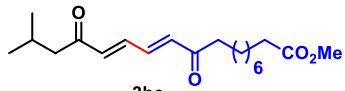

(125 MHz, CDCl<sub>3</sub>)

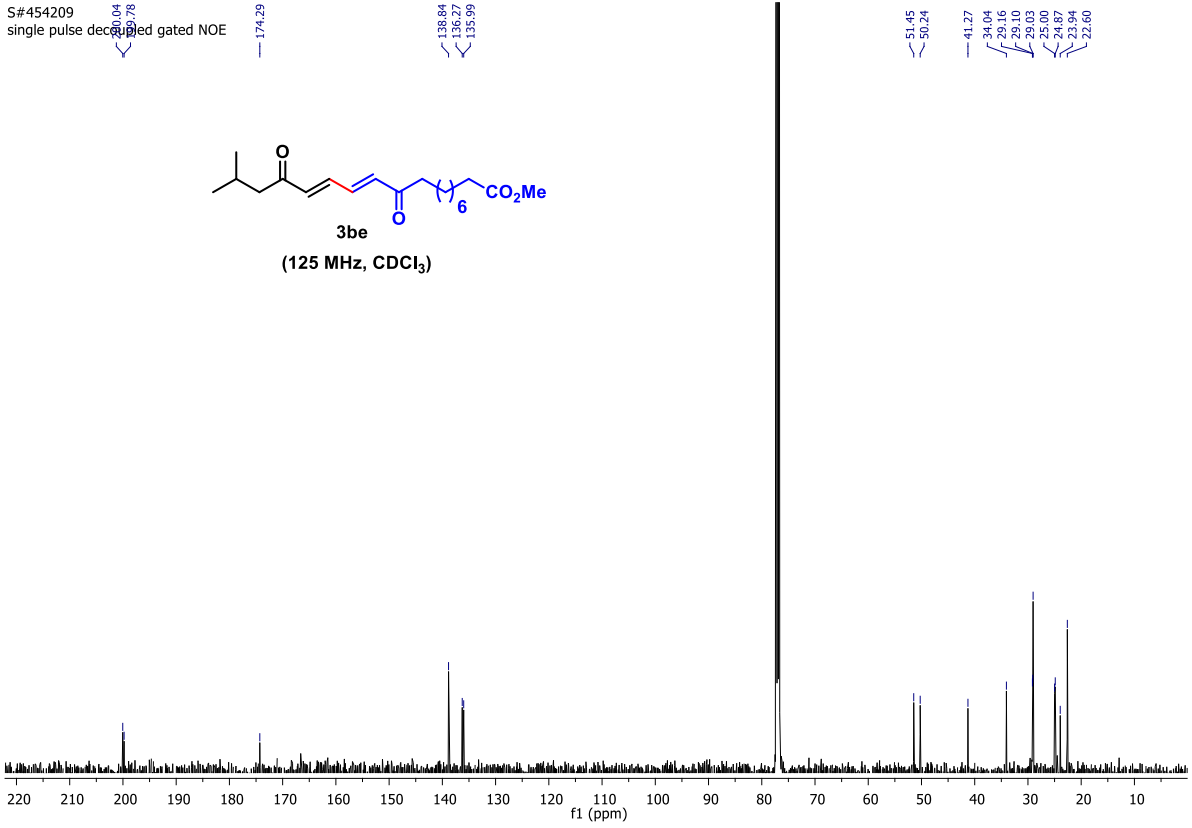

AN501448  
Prove need to be repair

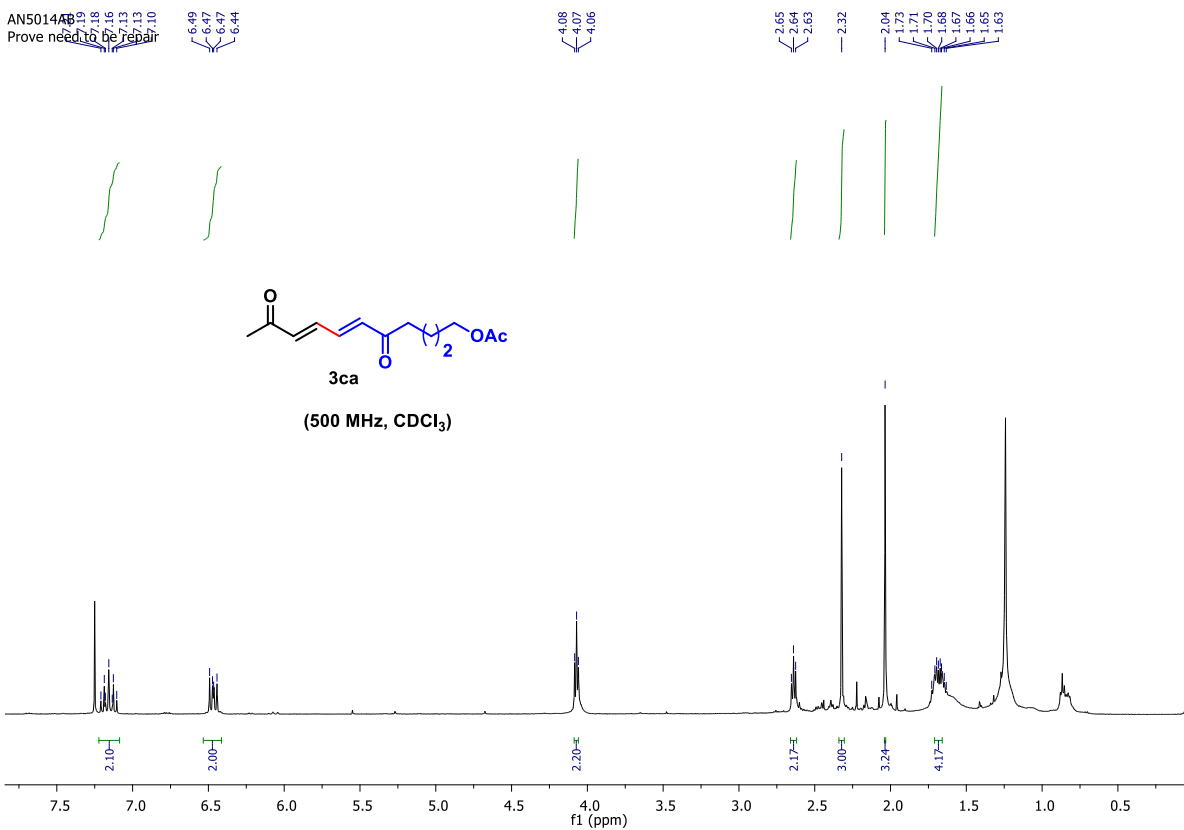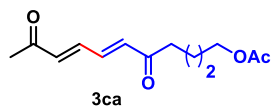

(500 MHz, CDCl<sub>3</sub>)

AN501448  
Prove need to be repair

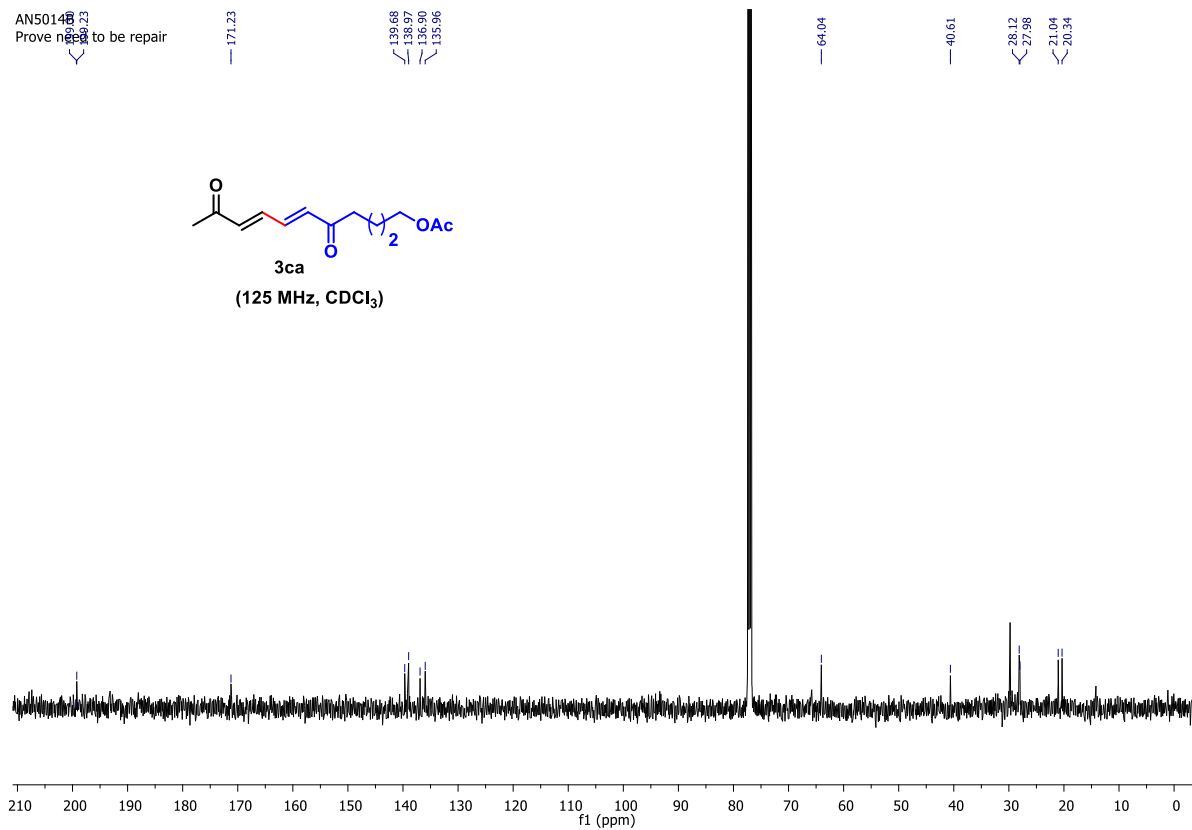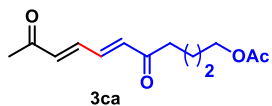

(125 MHz, CDCl<sub>3</sub>)

S#590598

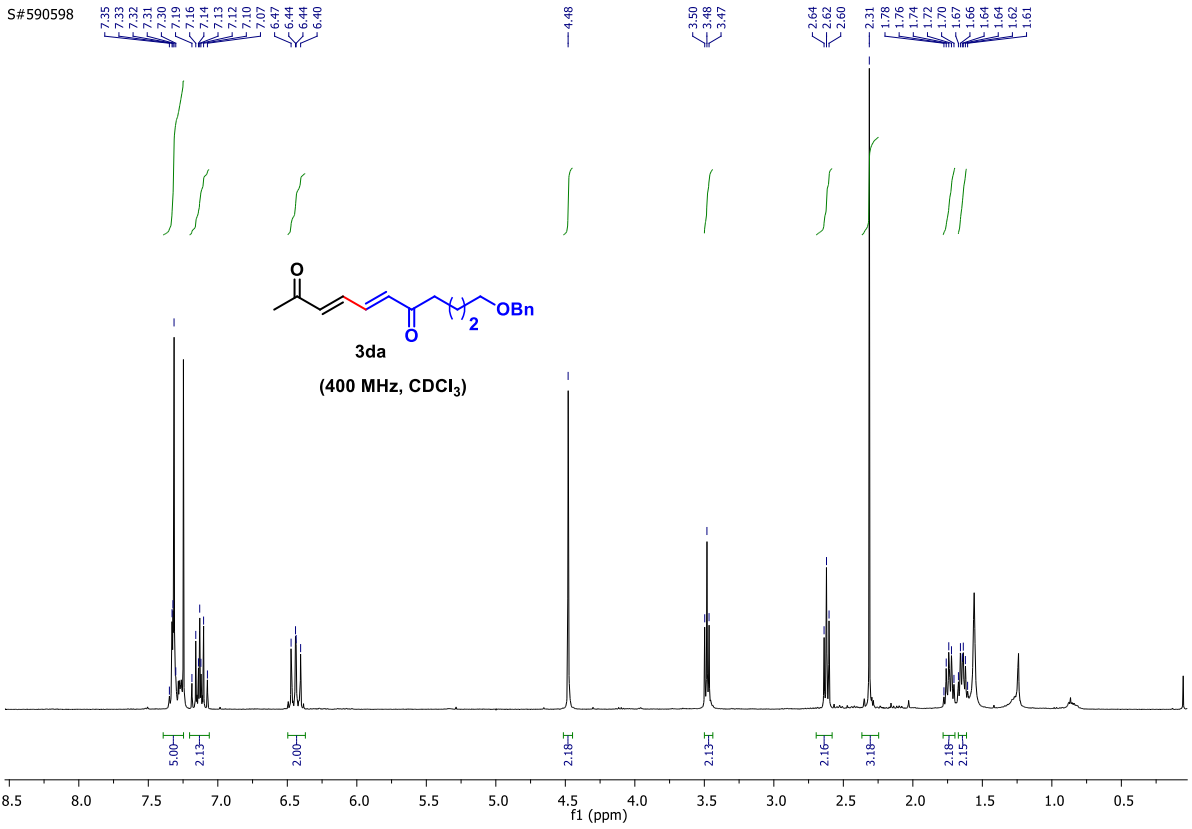

S#717899

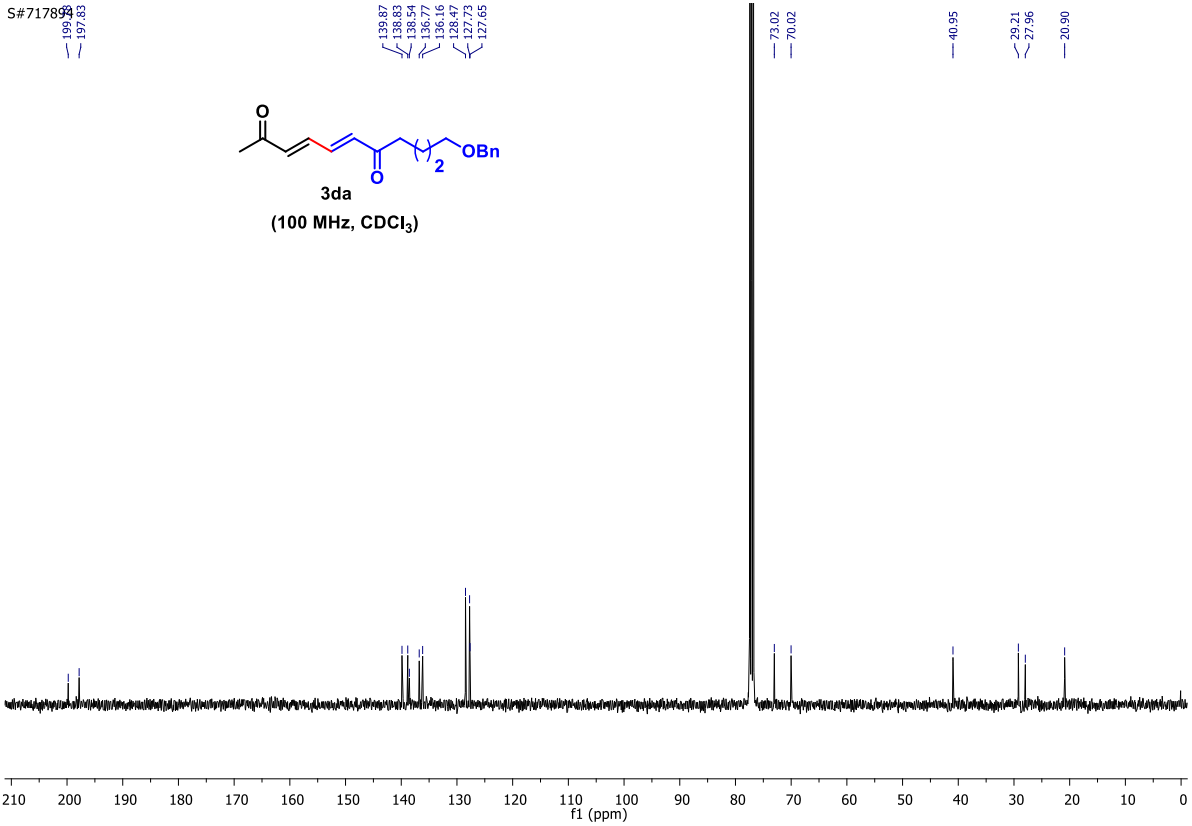

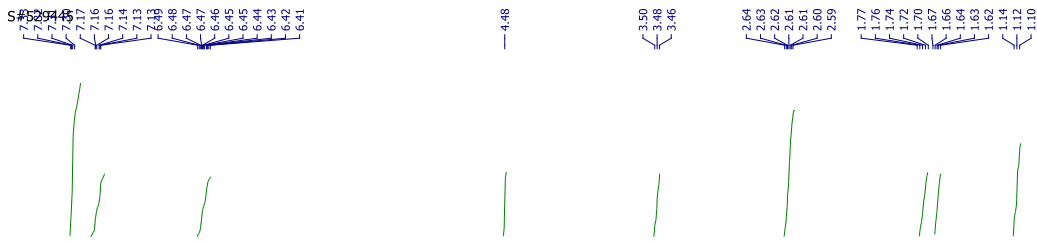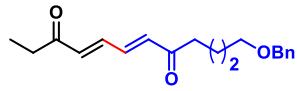

**3db**  
(400 MHz, CDCl<sub>3</sub>)

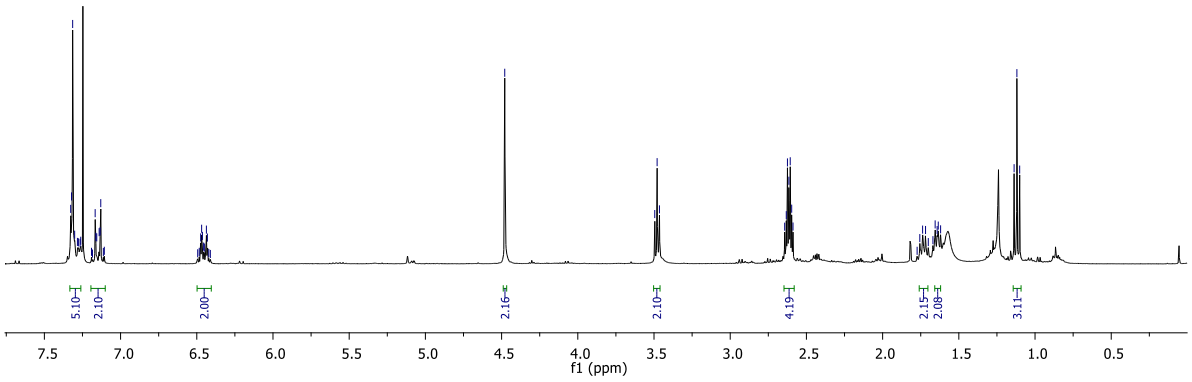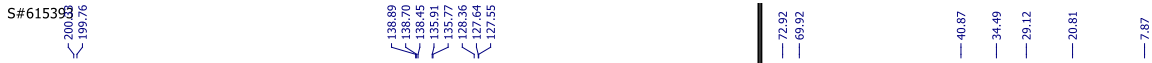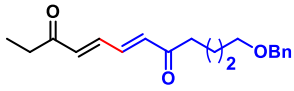

**3db**  
(100 MHz, CDCl<sub>3</sub>)

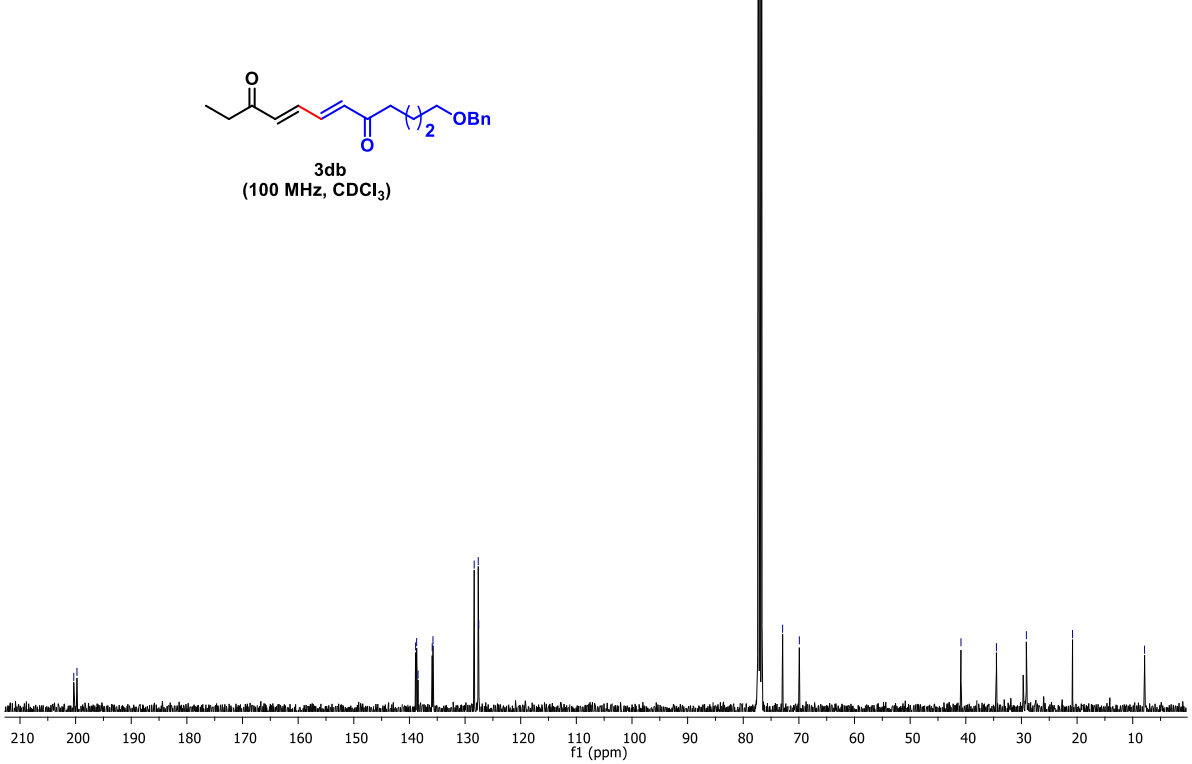



GLLCHHEX2

7.15  
7.14  
7.13  
7.12

6.47  
6.46  
6.44  
6.43

4.03  
4.02  
4.00

2.59  
2.58  
2.56  
2.55  
2.54  
2.53

2.00

1.64  
1.62  
1.61  
1.59

1.38  
1.36  
1.35  
1.34  
1.32  
1.31

0.92  
0.91  
0.89

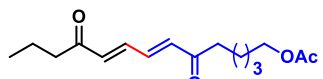

3cc

(500 MHz, CDCl<sub>3</sub>)

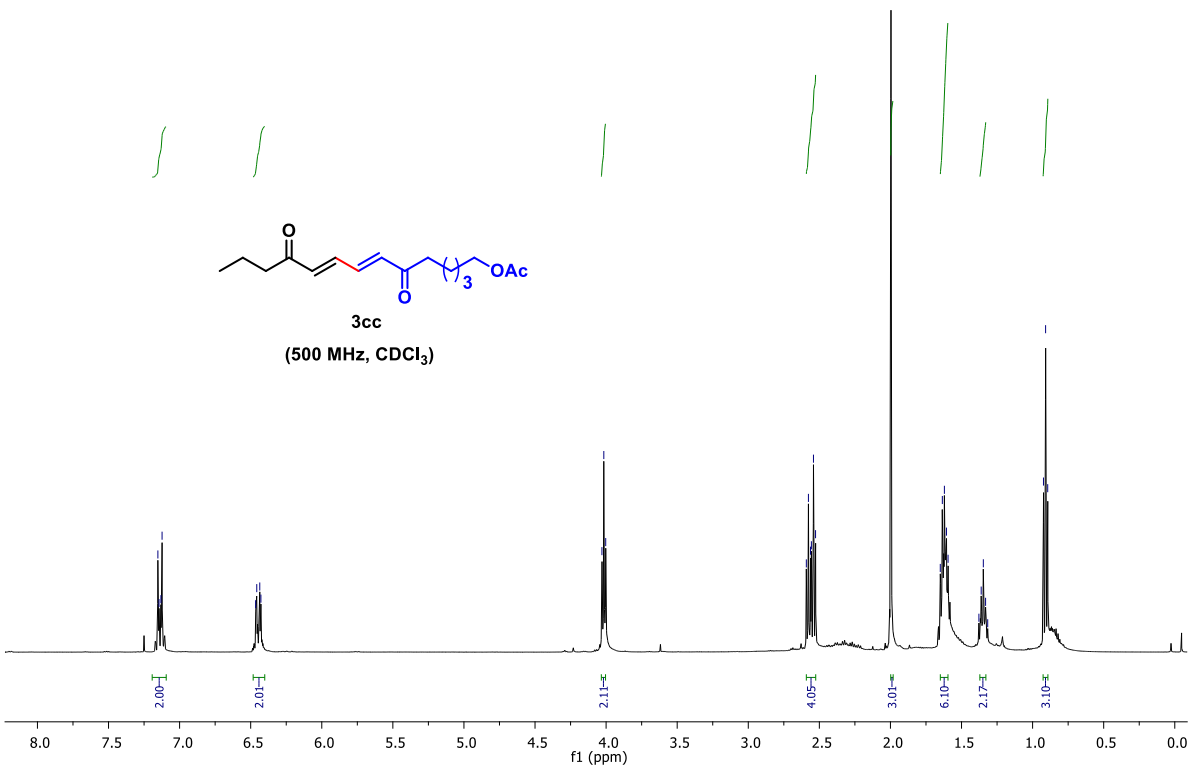

GLLCHHEX2

199.82  
199.82

171.20

139.03  
138.77  
138.57  
135.90

64.28

43.21  
41.05

28.49  
25.60  
23.56  
21.02  
17.51  
13.77

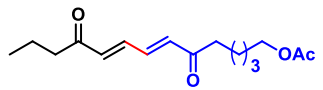

3cc

(125 MHz, CDCl<sub>3</sub>)

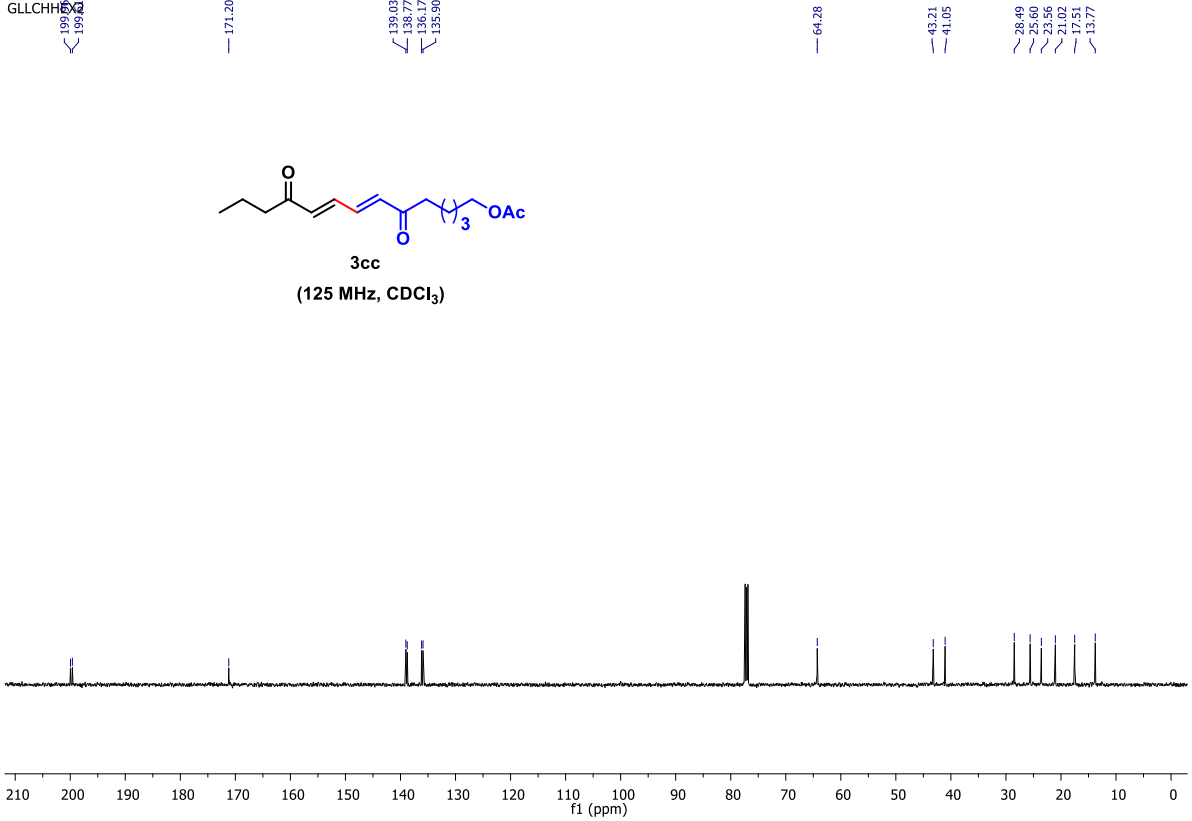

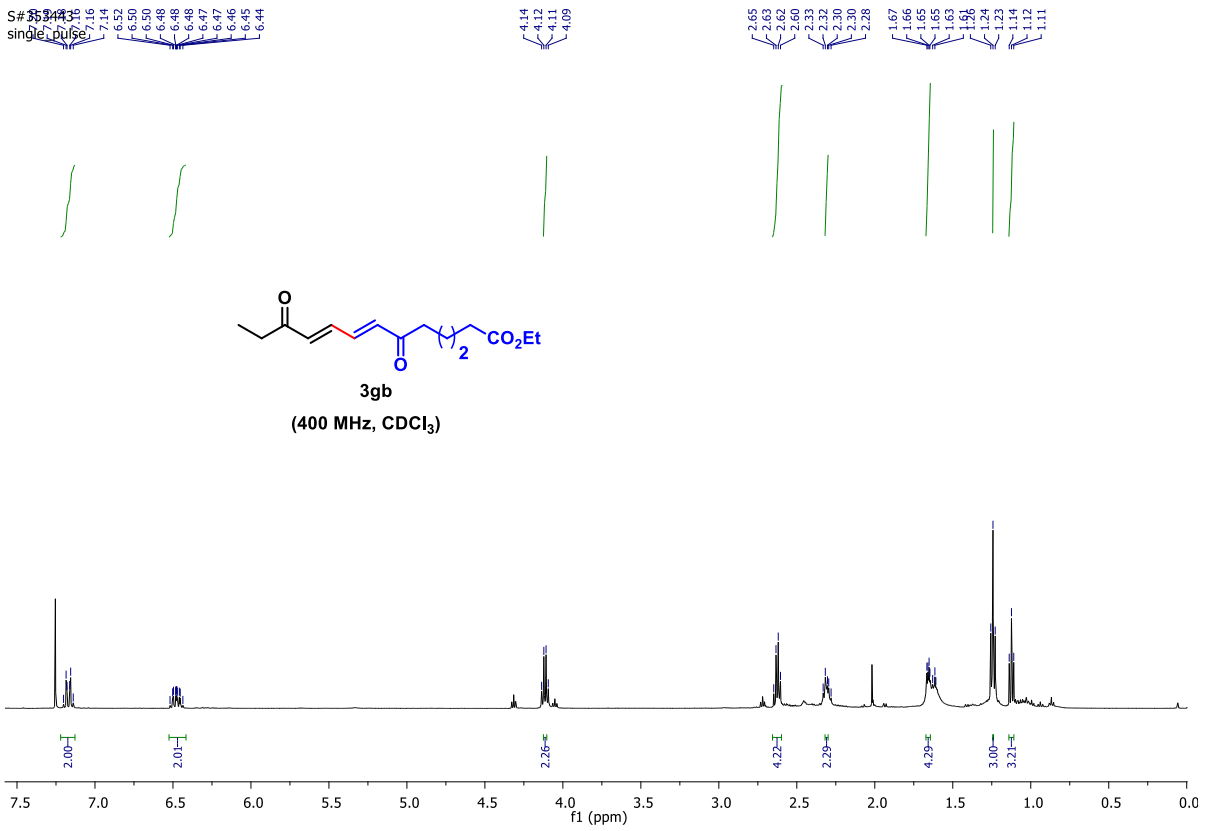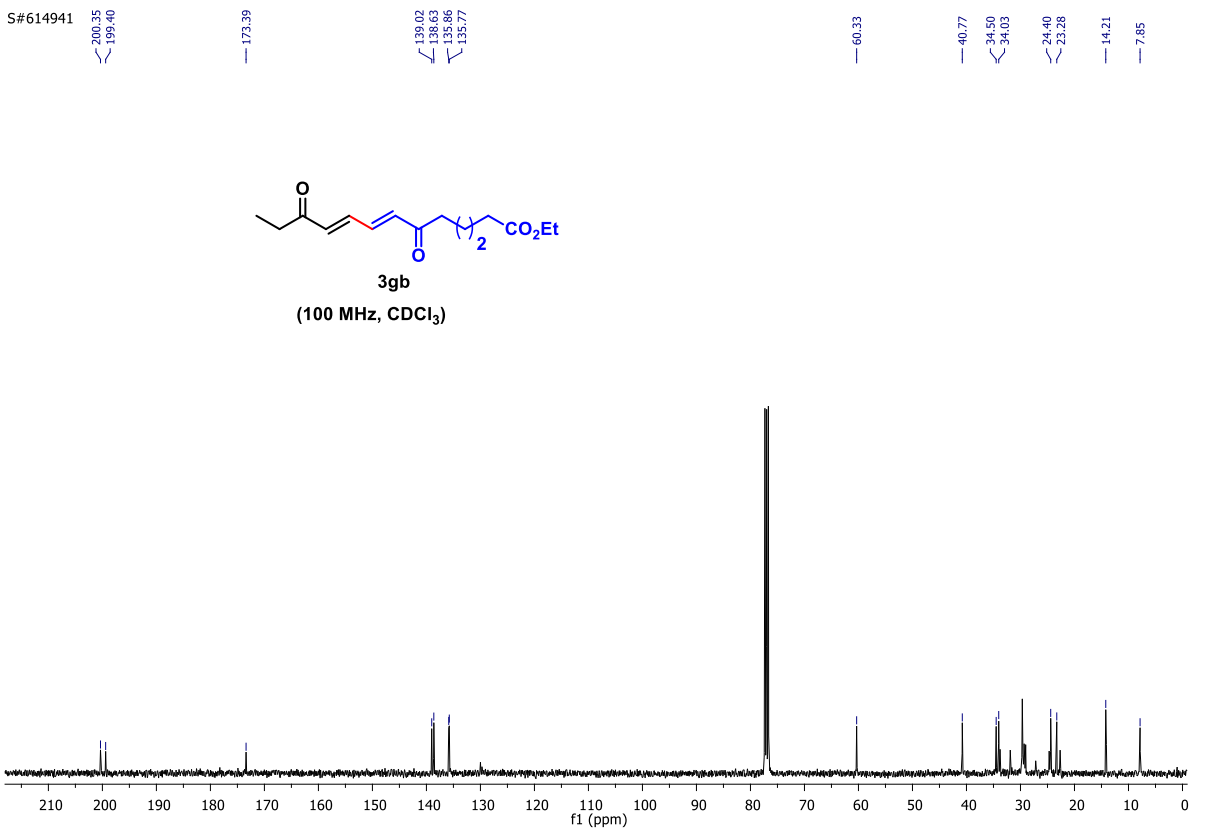

S#612924

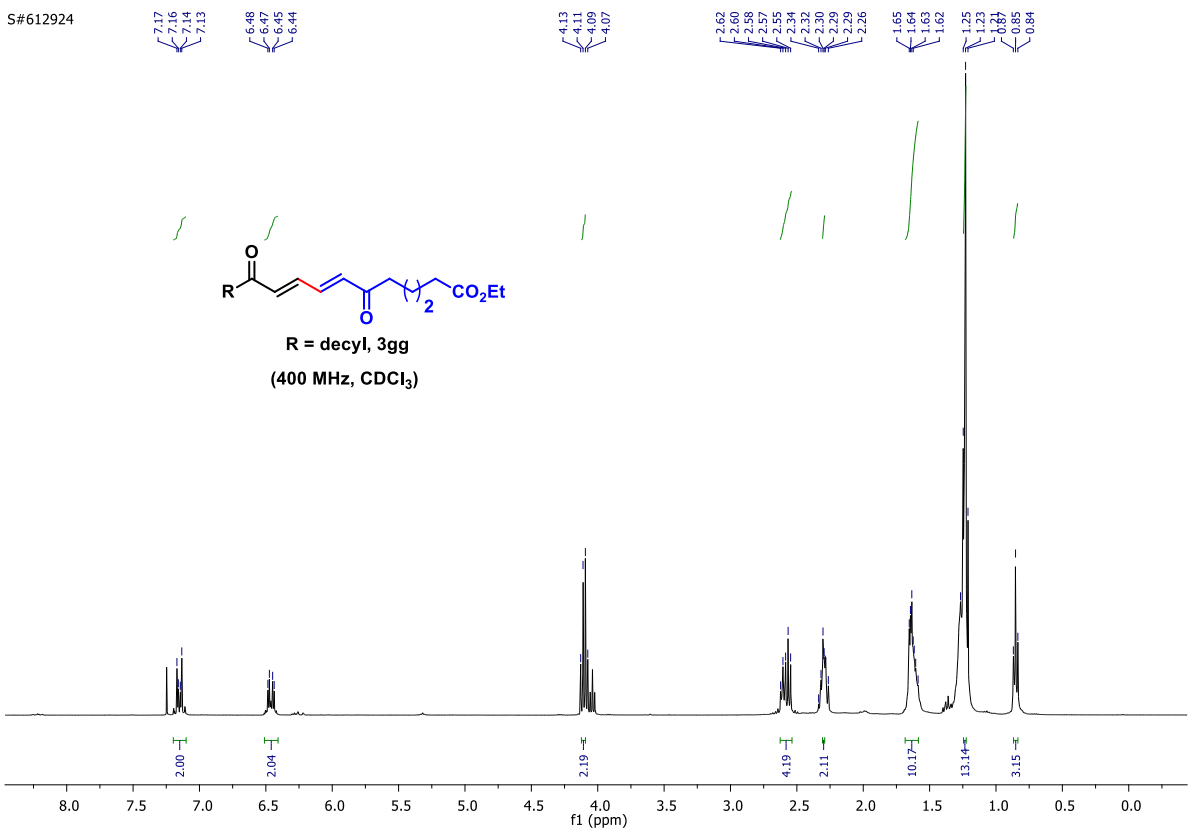

S#690808

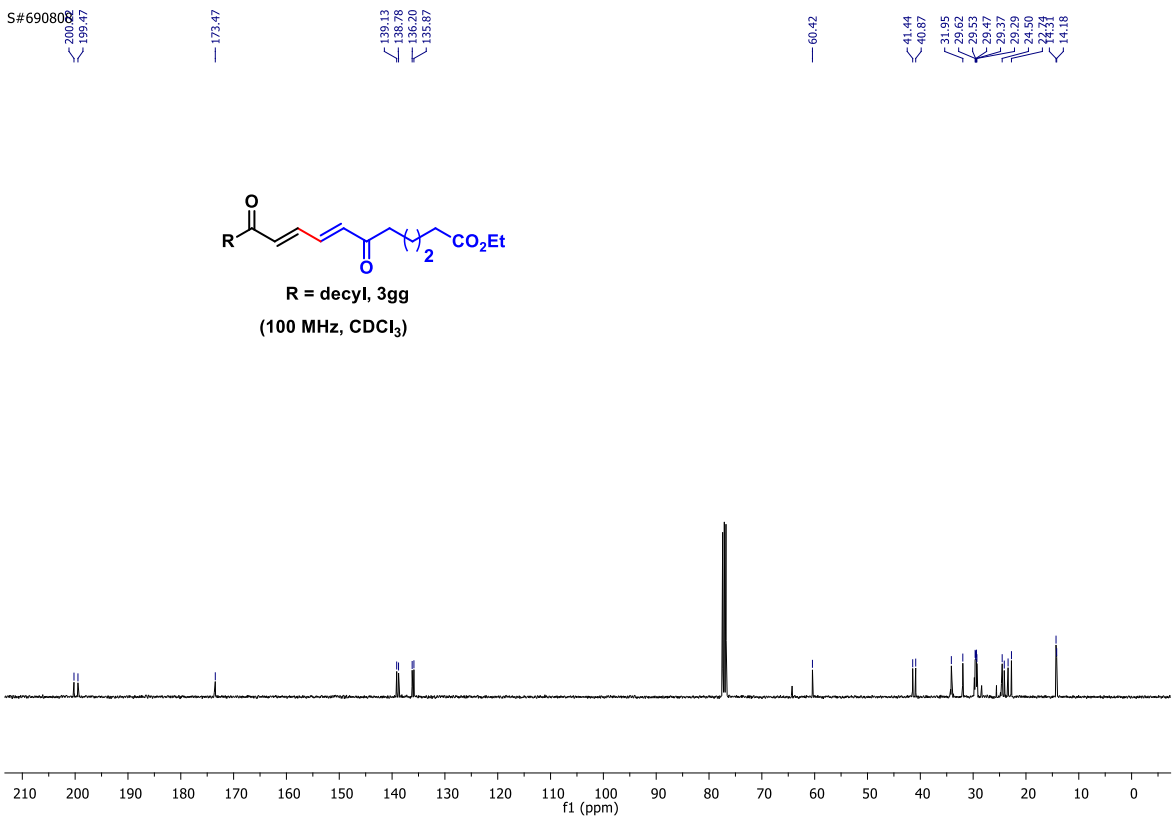

S#607578

7.19  
7.19  
7.15  
7.14  
7.12  
6.50  
6.49  
6.48  
6.46  
6.45  
6.43

2.59  
2.57  
2.55

1.65  
1.63  
1.61  
1.59  
1.58  
1.27  
1.24  
0.88  
0.86  
0.84

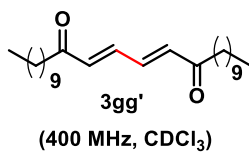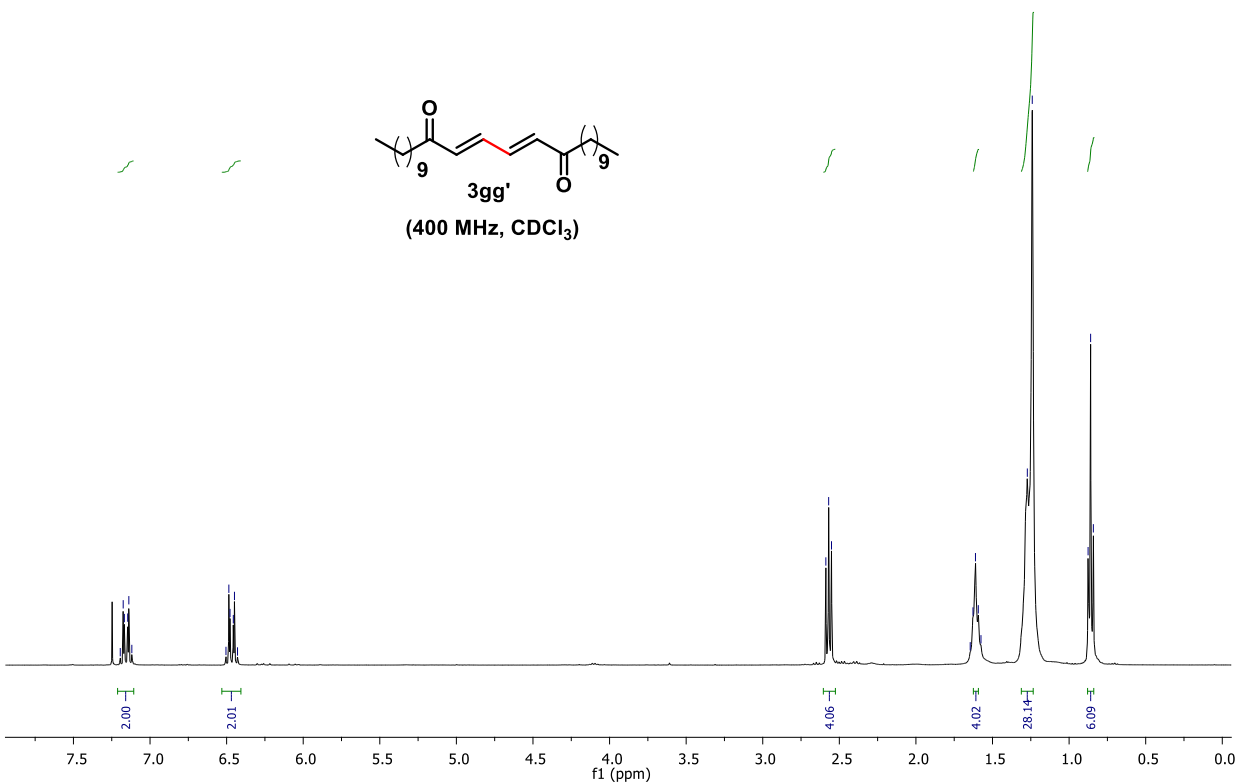

S#690752

200.24

138.91  
136.06

41.43  
31.95  
30.69  
29.54  
29.48  
29.38  
29.30  
24.12  
22.75  
14.19

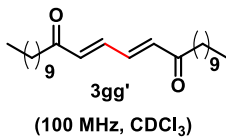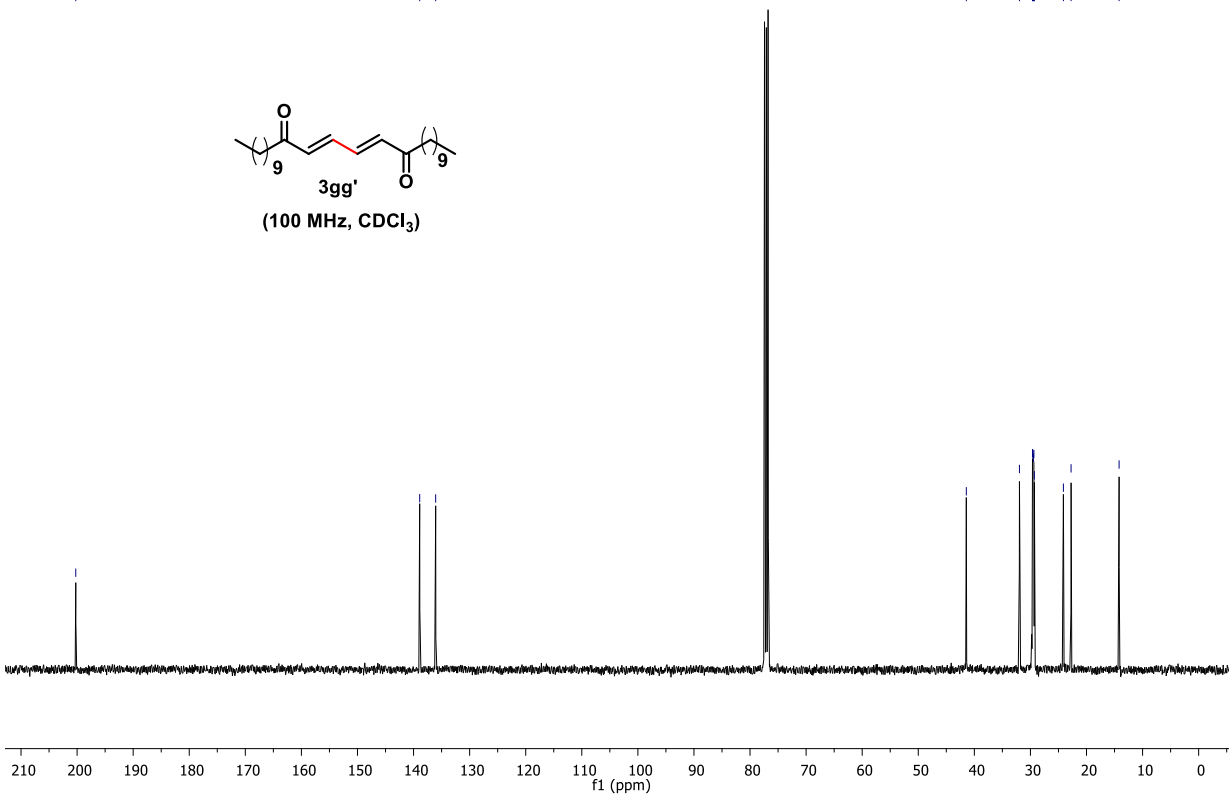

S#384938  
single\_pulse

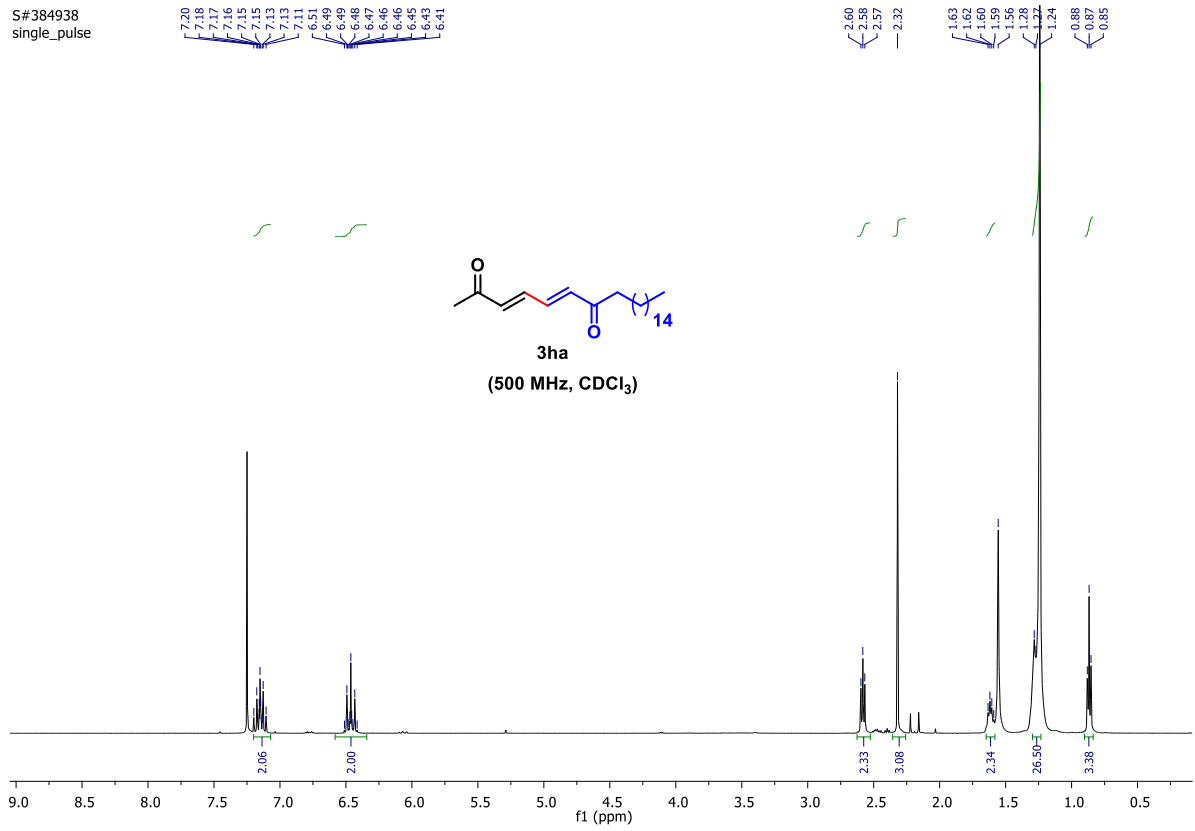

S#692883  
single\_pulse decoupled gated NOE

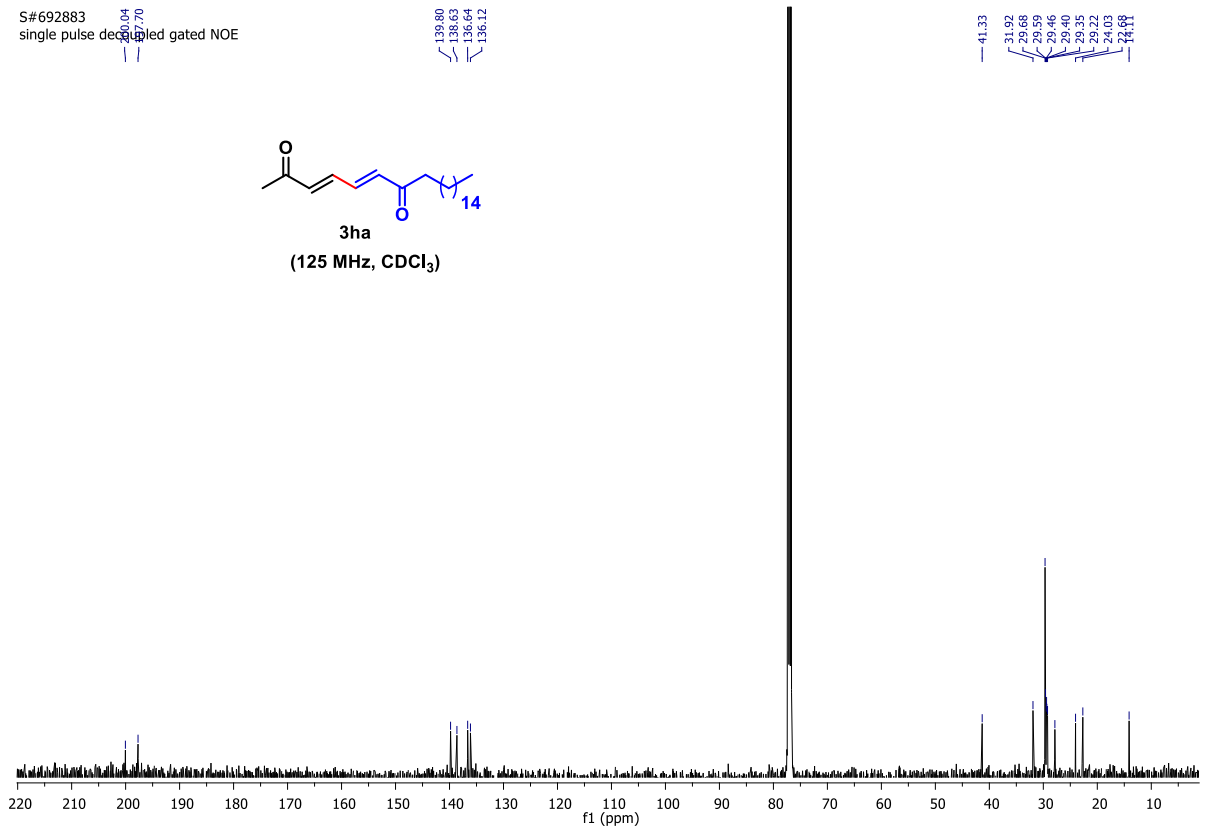

S#476746

7.34  
7.31  
7.30  
7.27  
7.20  
7.17  
7.16  
7.13  
6.46  
6.42  
6.24  
6.20

3.77

2.64  
2.63  
2.61  
2.59

1.13  
1.11  
1.09

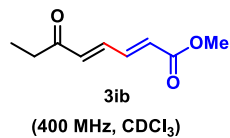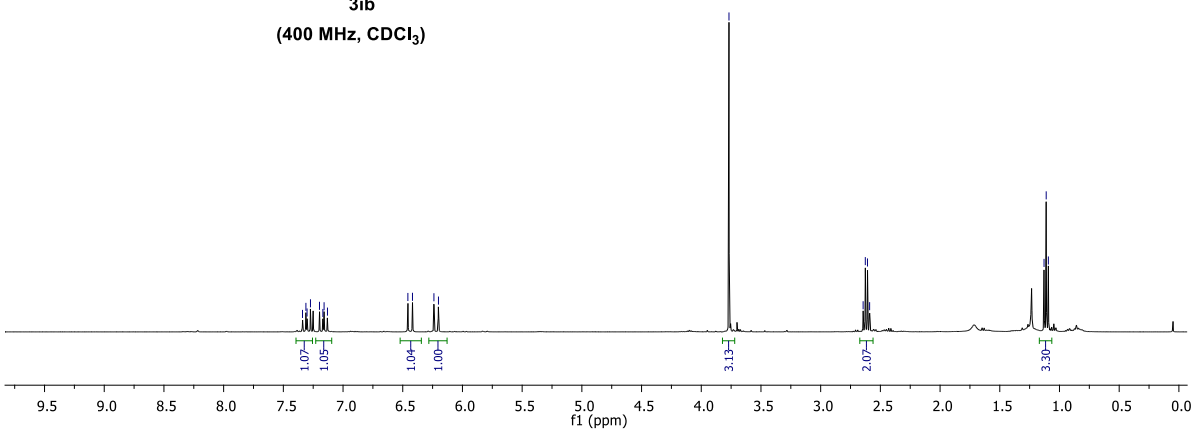

S#606579

200.41

166.29

141.65

138.00

135.32

128.34

51.93

34.47

7.84

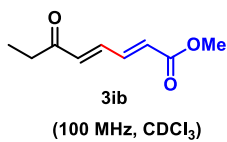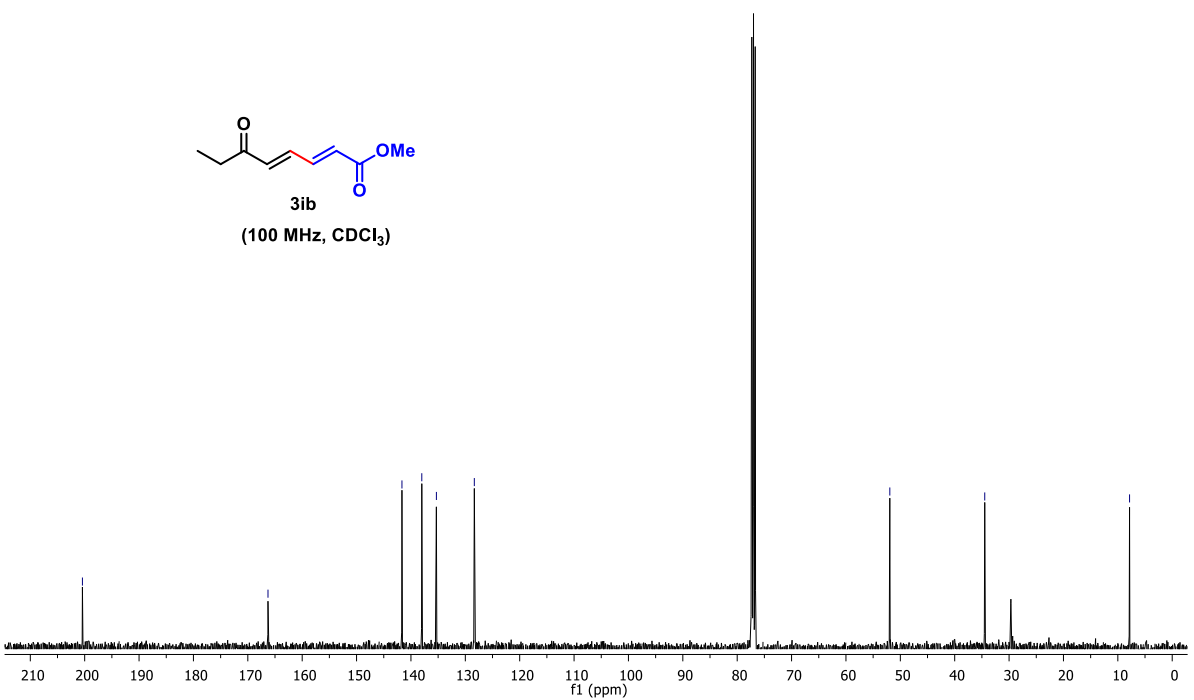

S#530173

7.24  
7.21  
7.18  
7.17  
7.14  
7.13  
7.10  
6.58  
6.45  
6.43

2.58  
2.57  
2.56  
2.54  
2.51  
2.31

1.85  
1.82  
1.80  
1.78  
1.41  
1.38  
1.35  
1.32  
1.28

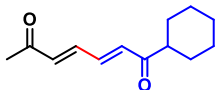

3ja

(400 MHz, CDCl<sub>3</sub>)

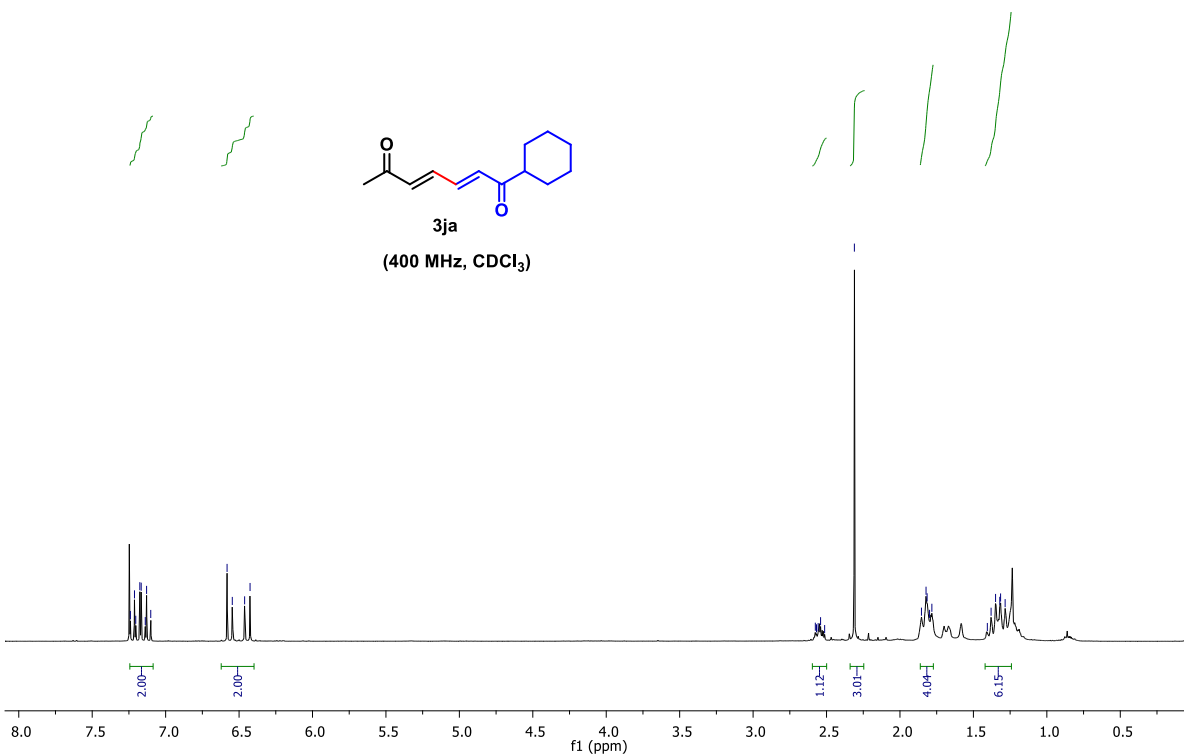

S#654082

202.82  
197.82

139.94  
138.76  
136.66  
134.93

49.64

28.48  
28.00  
25.86  
25.69

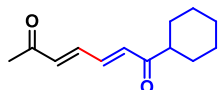

3ja

(100 MHz, CDCl<sub>3</sub>)

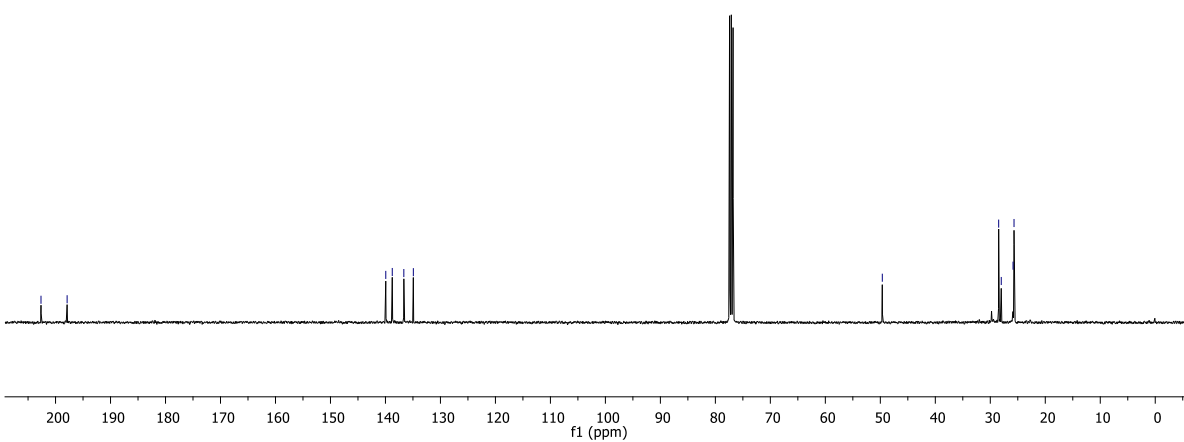

S#332104

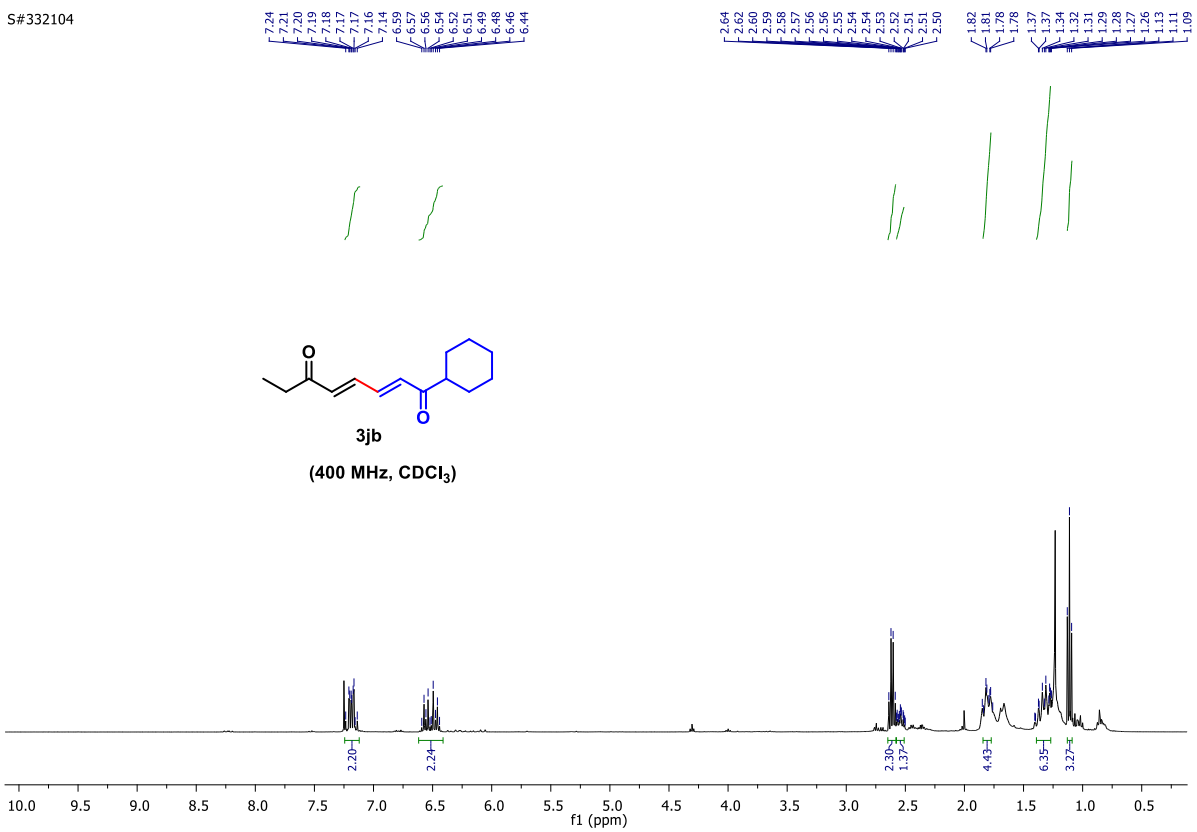

S#712256

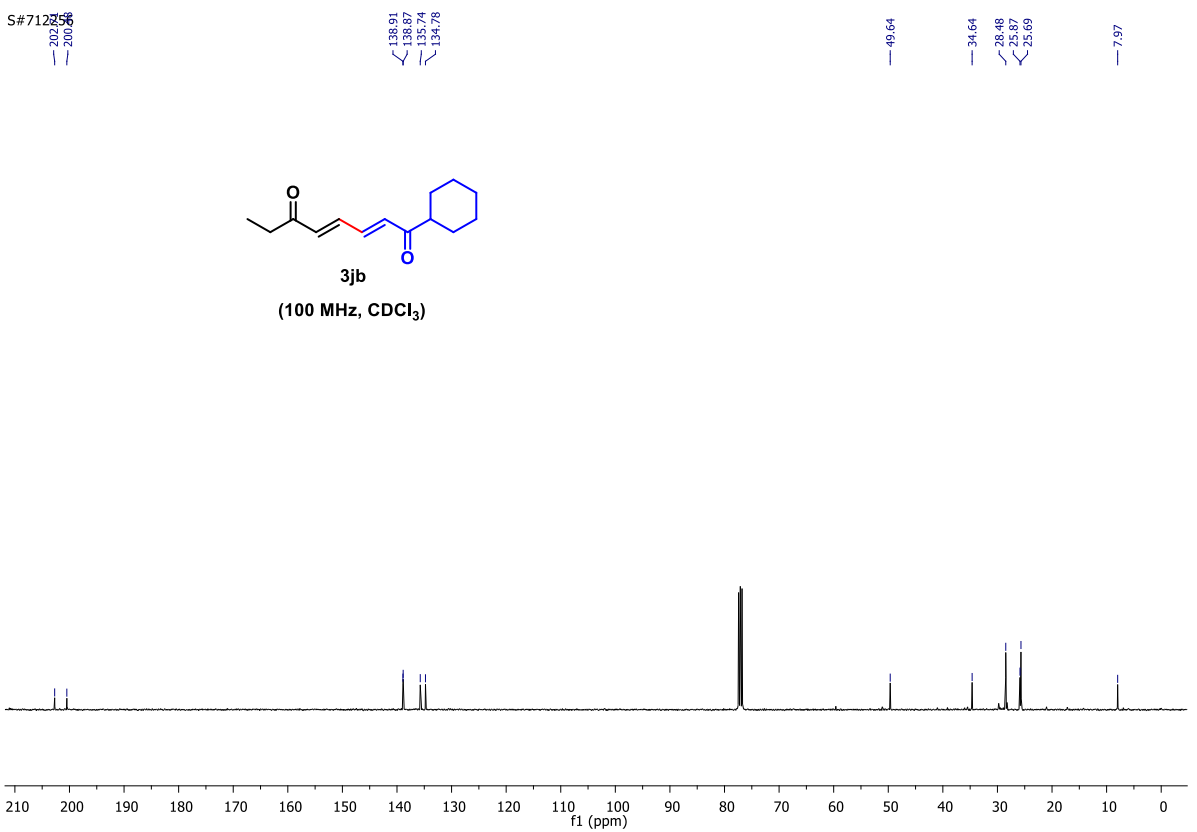



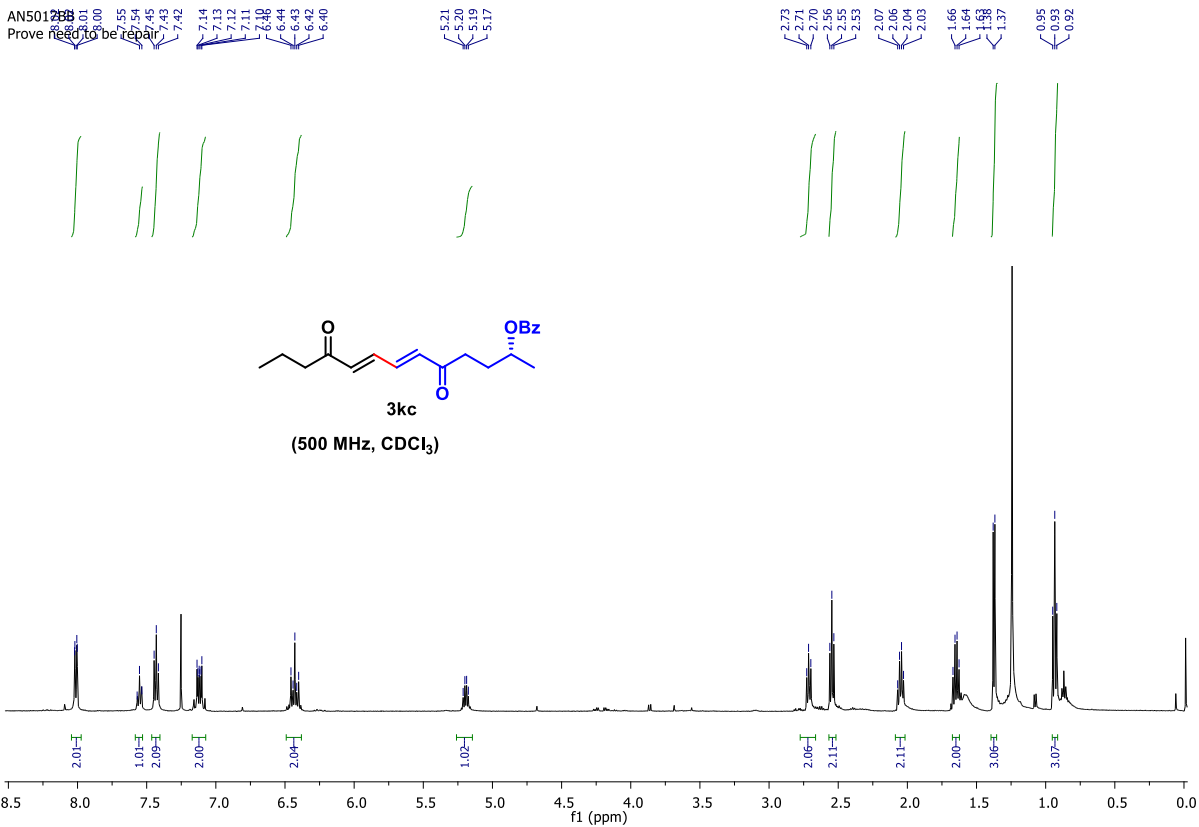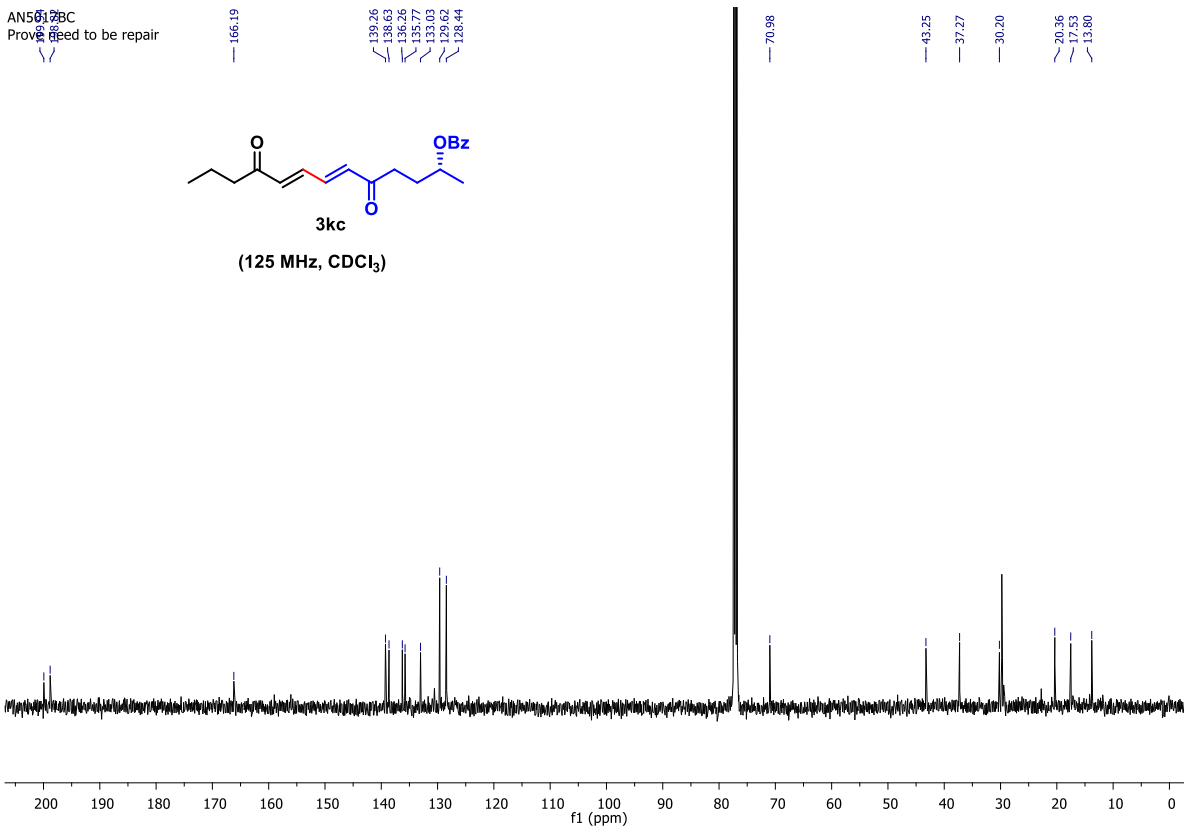

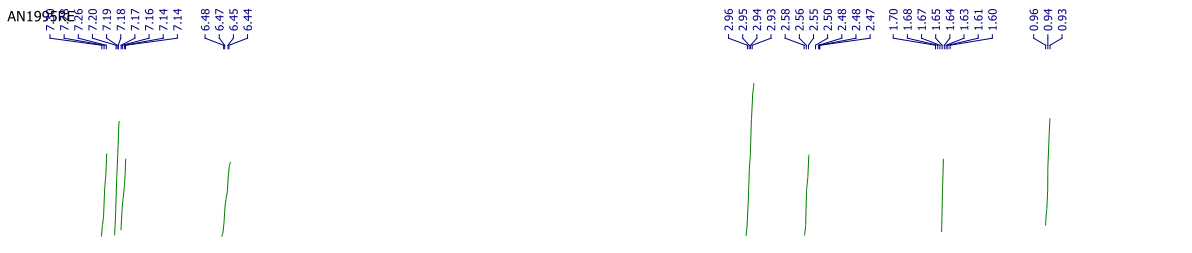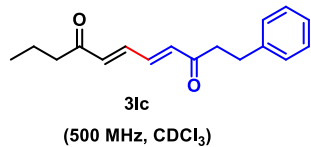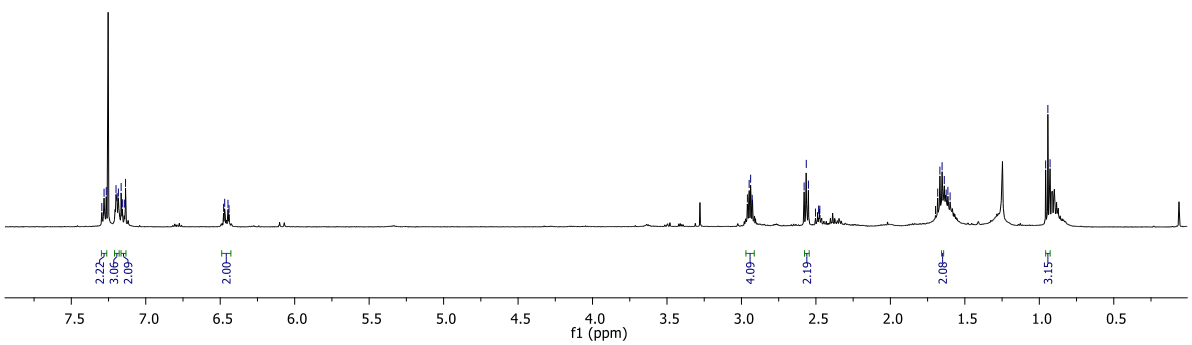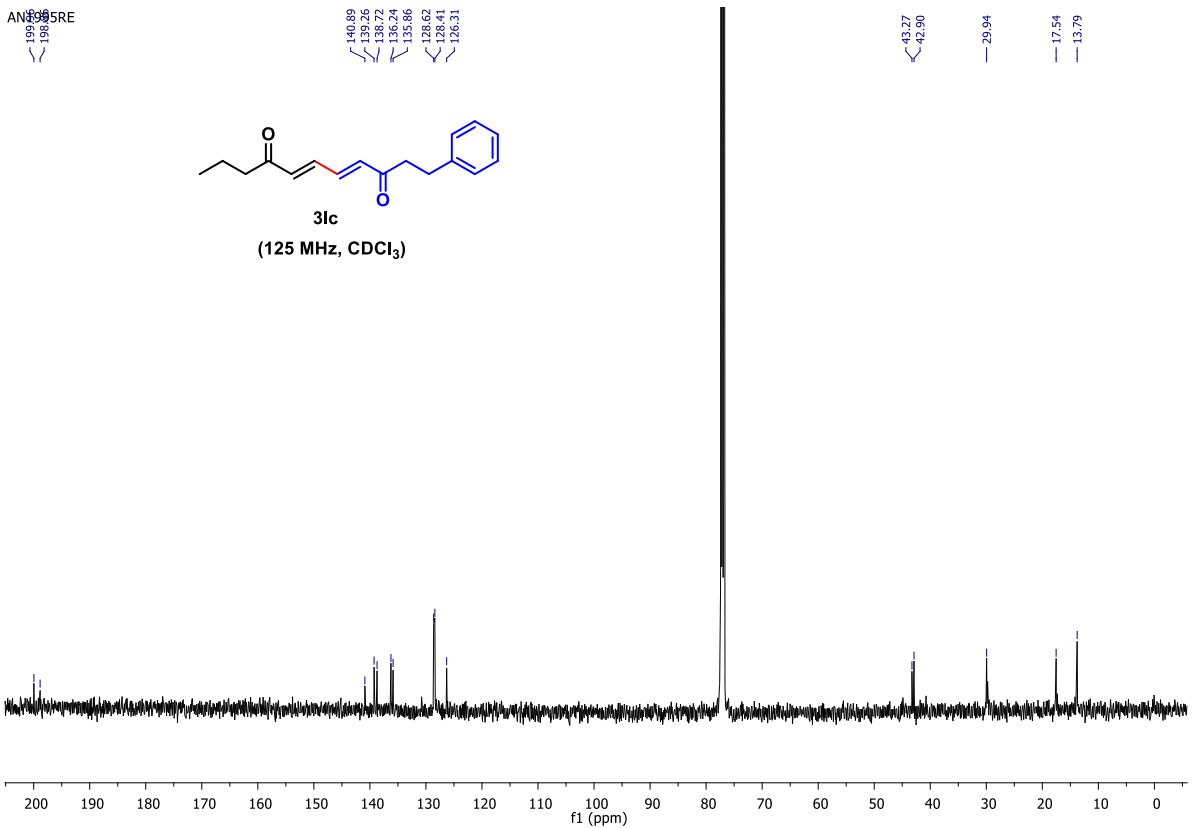

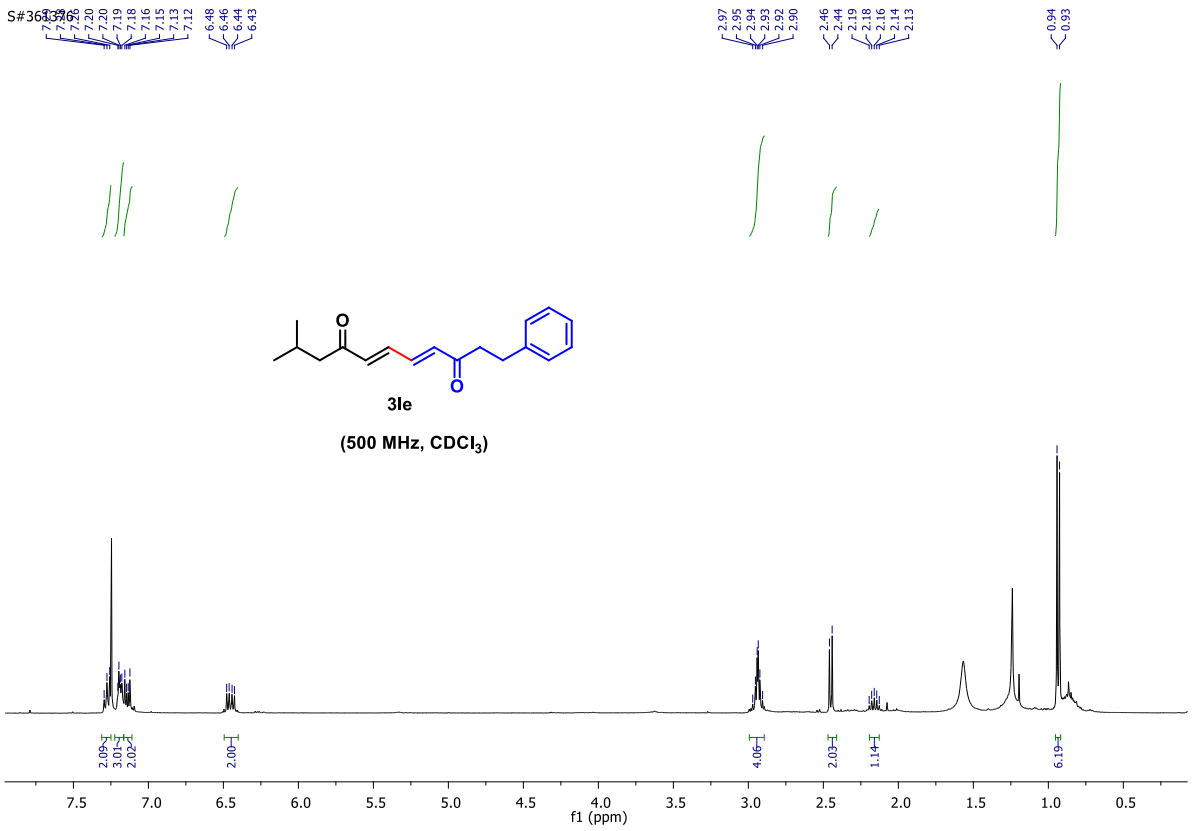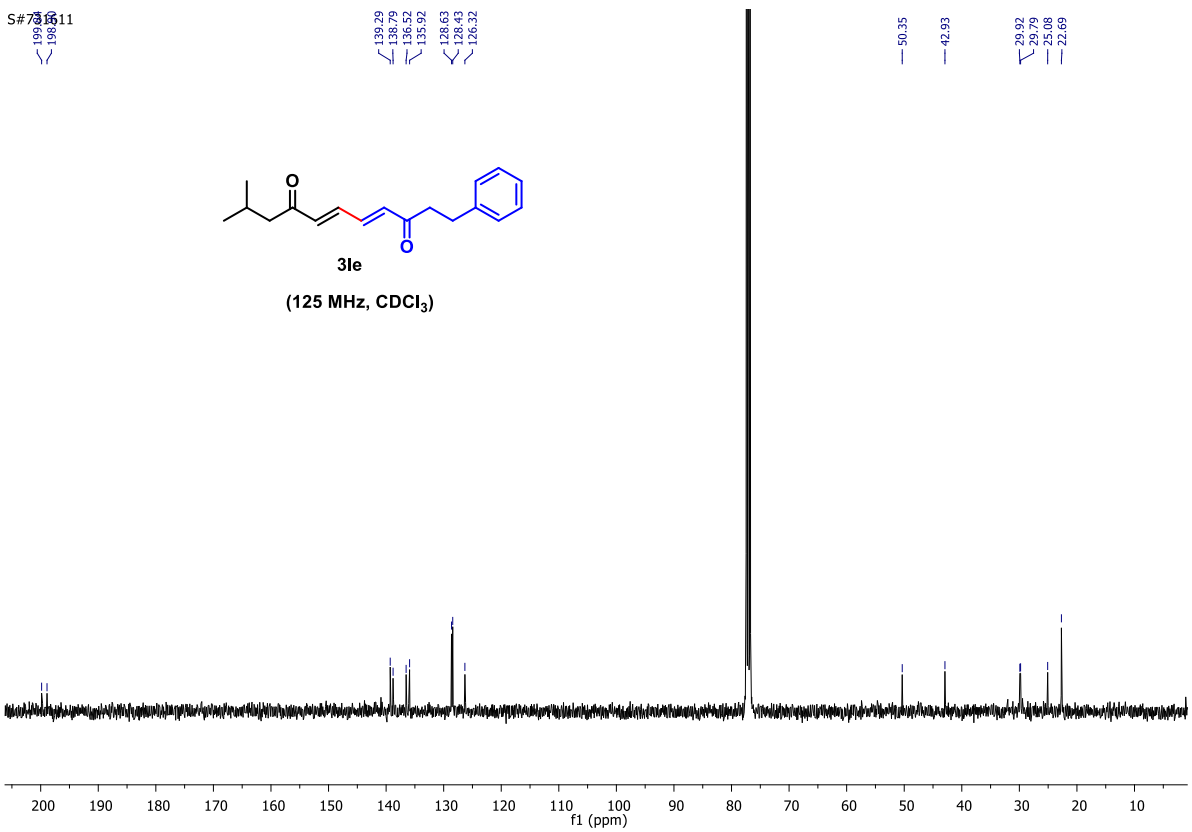

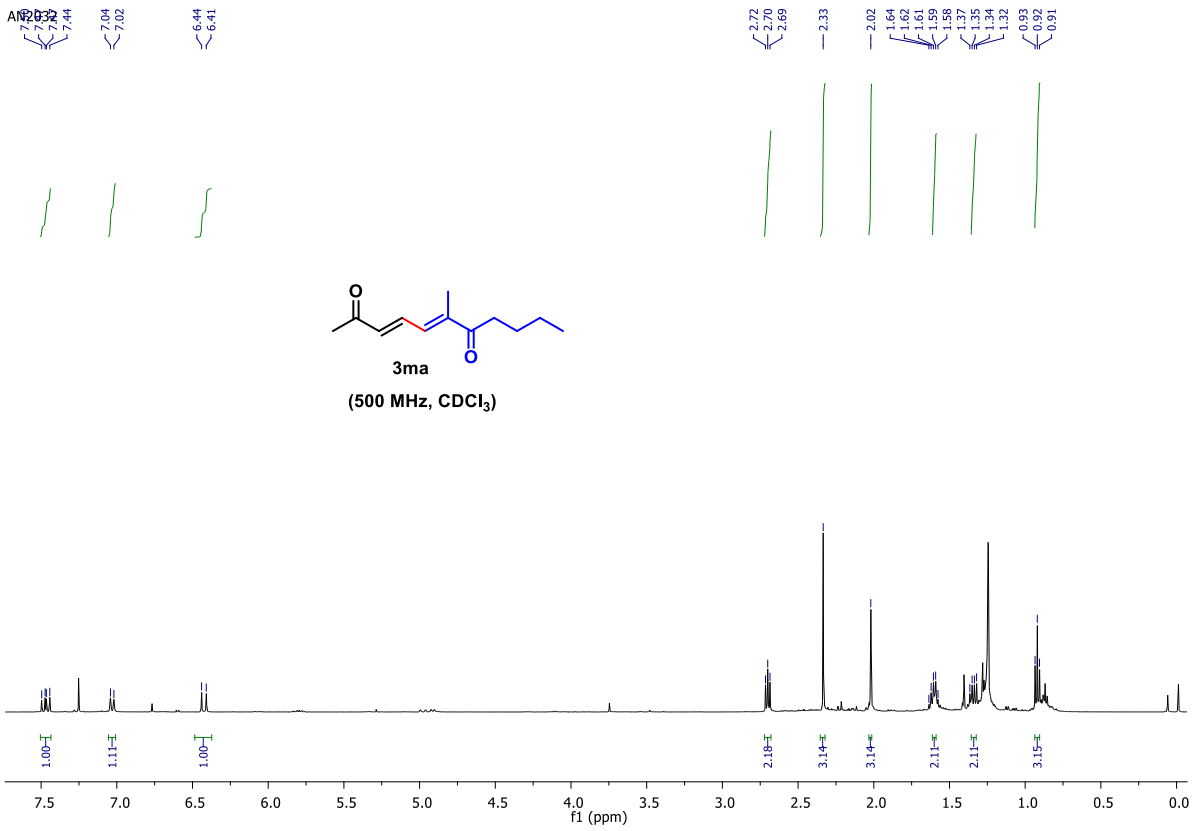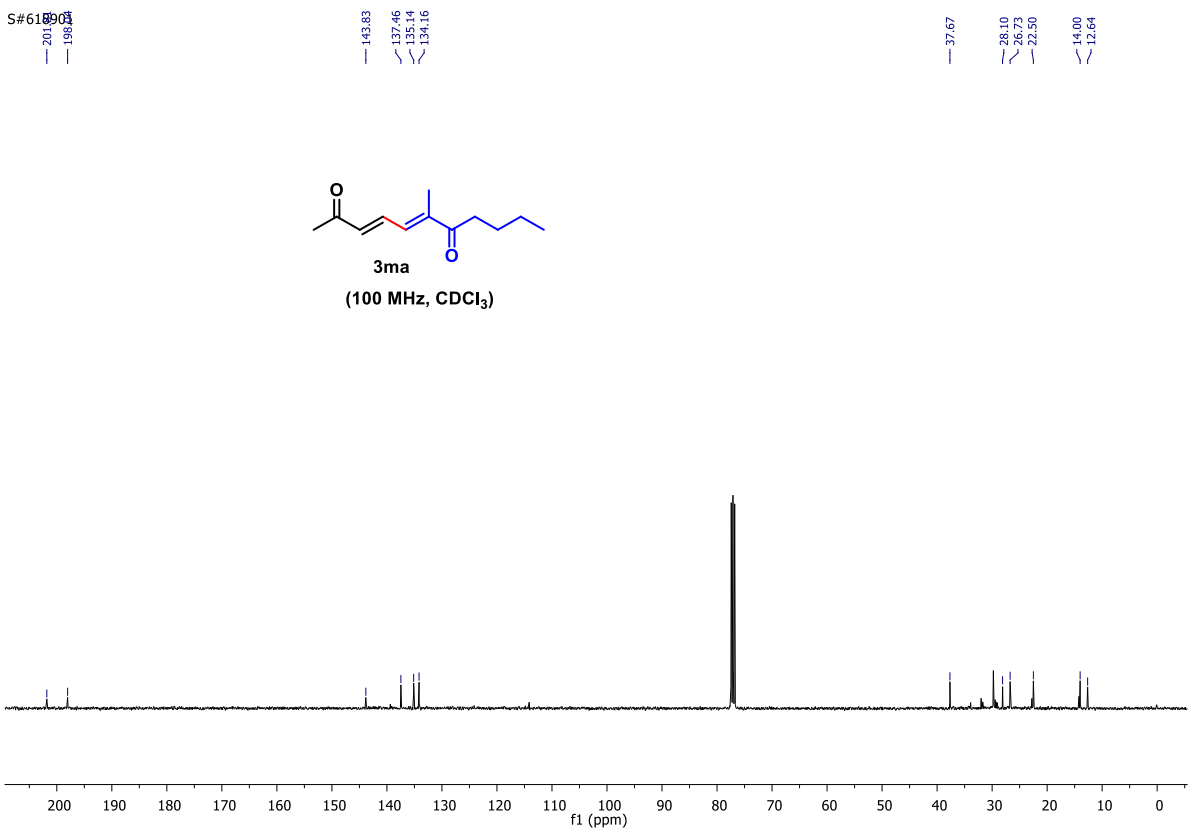

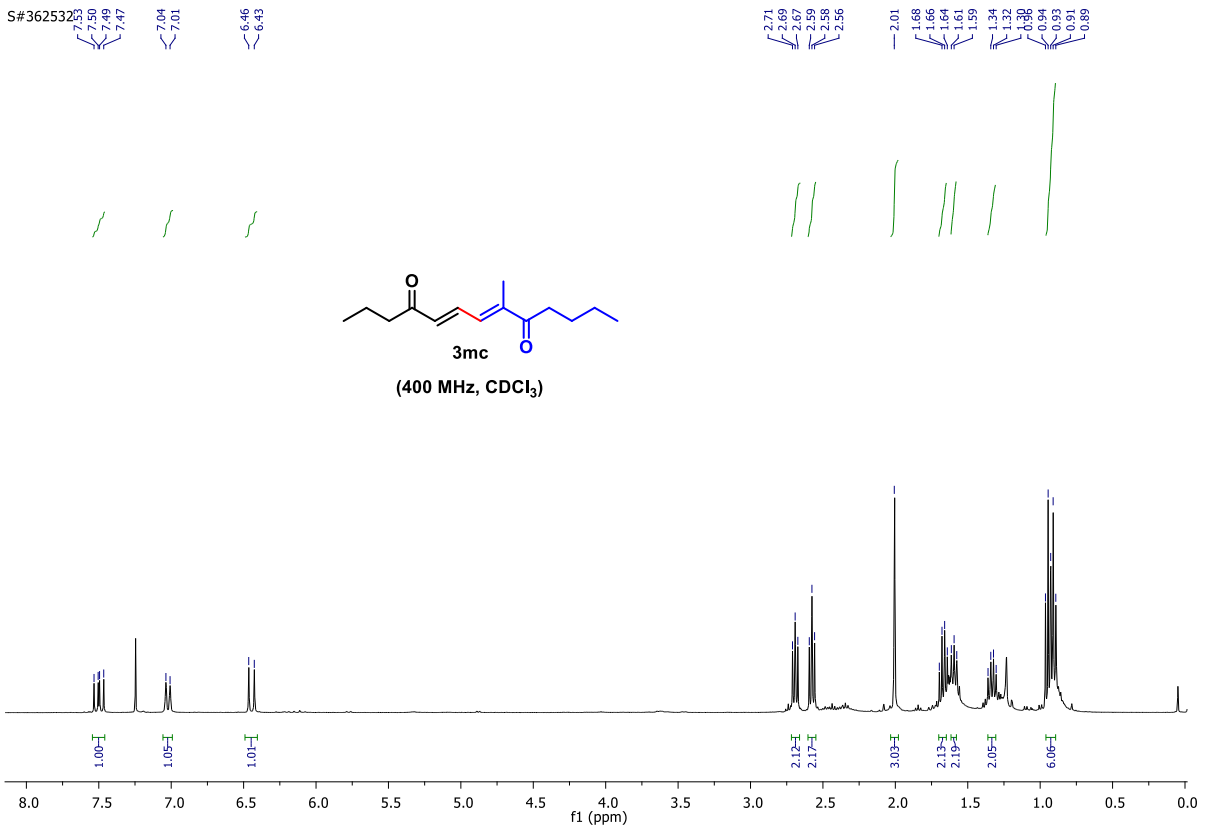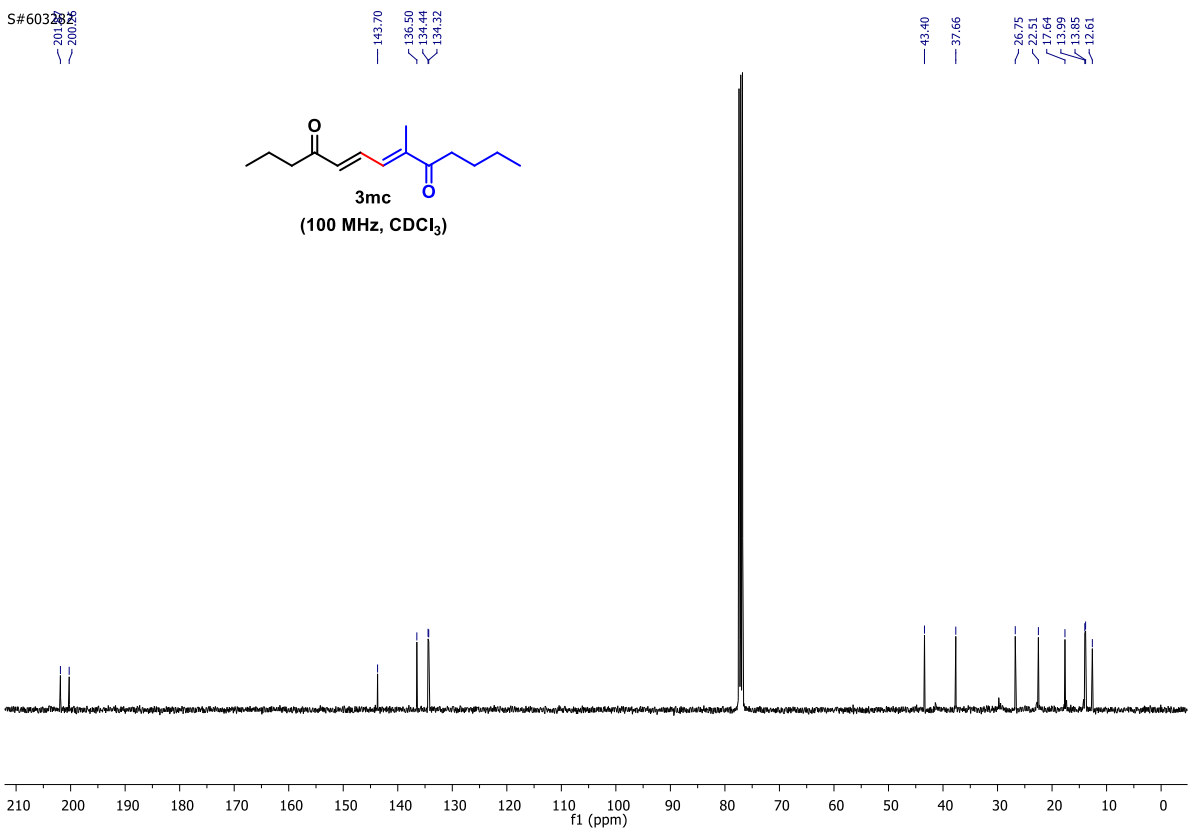

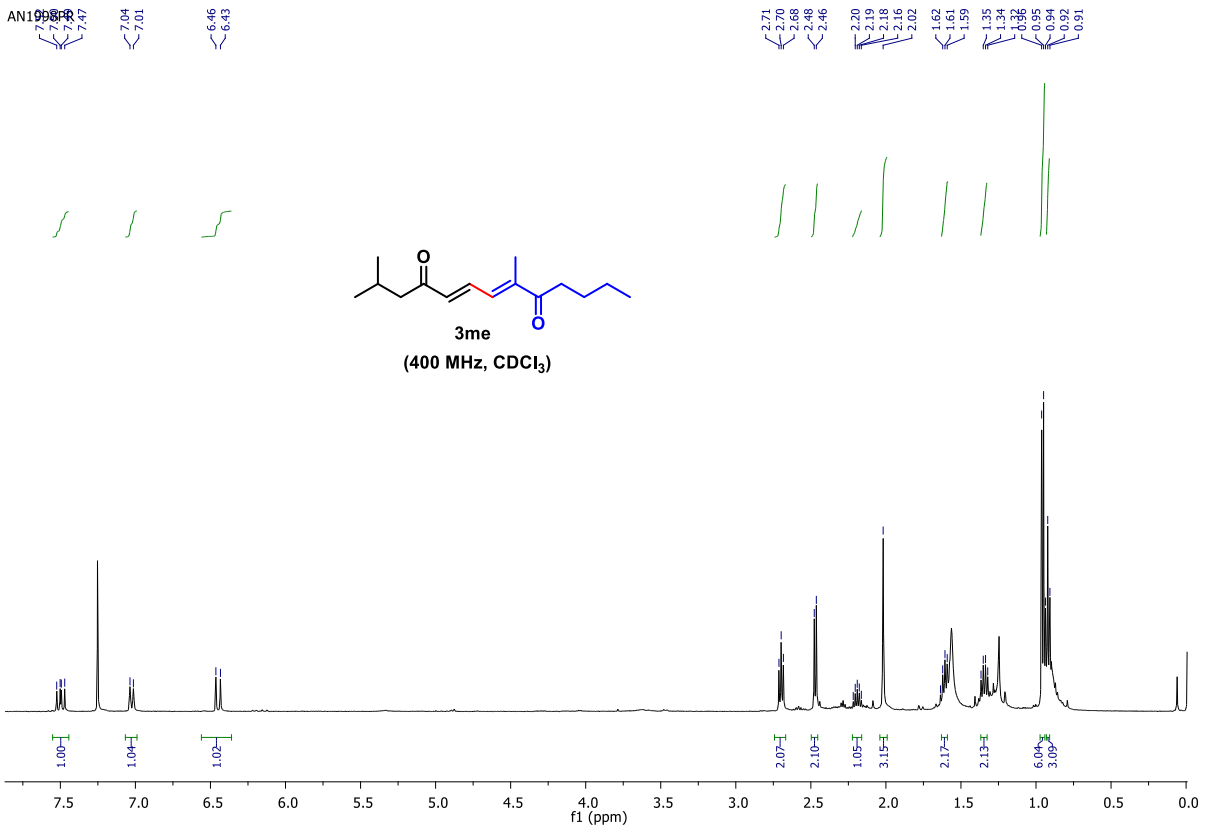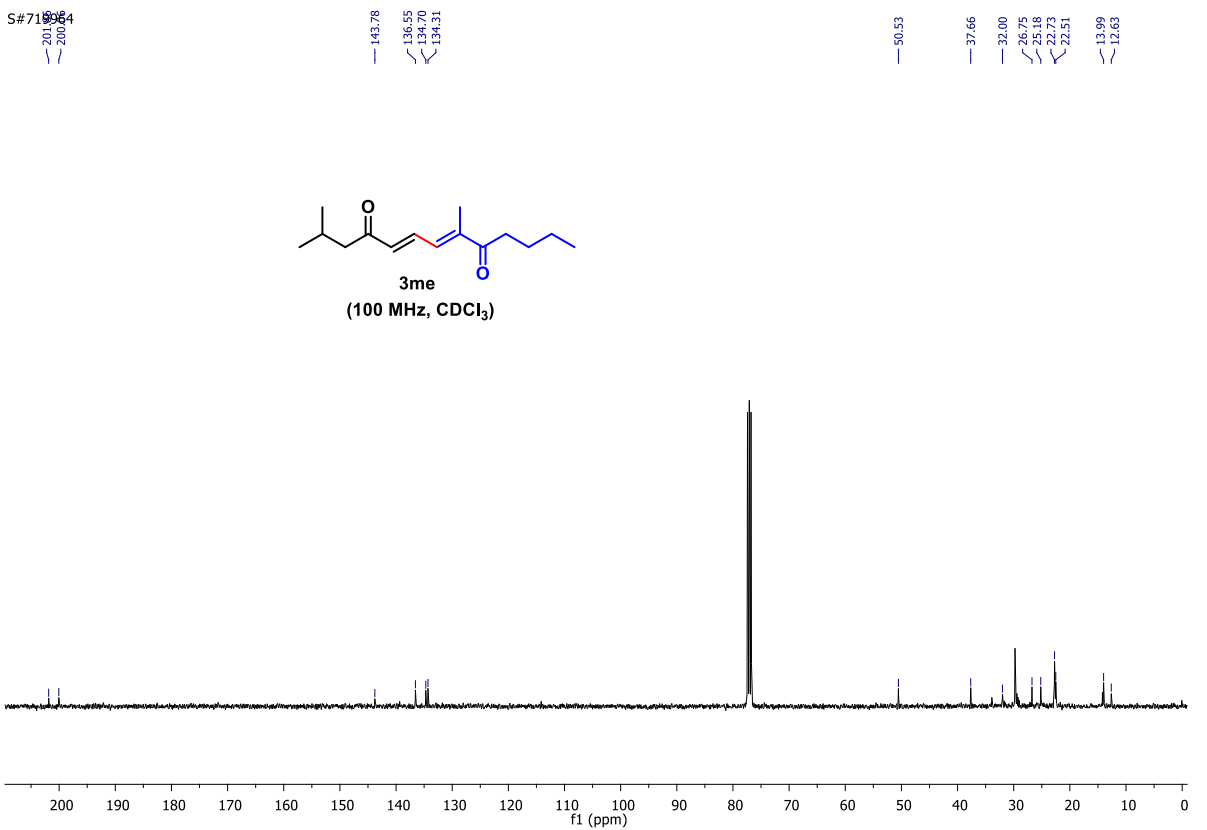

ANSOZORE  
Prove need to be repair

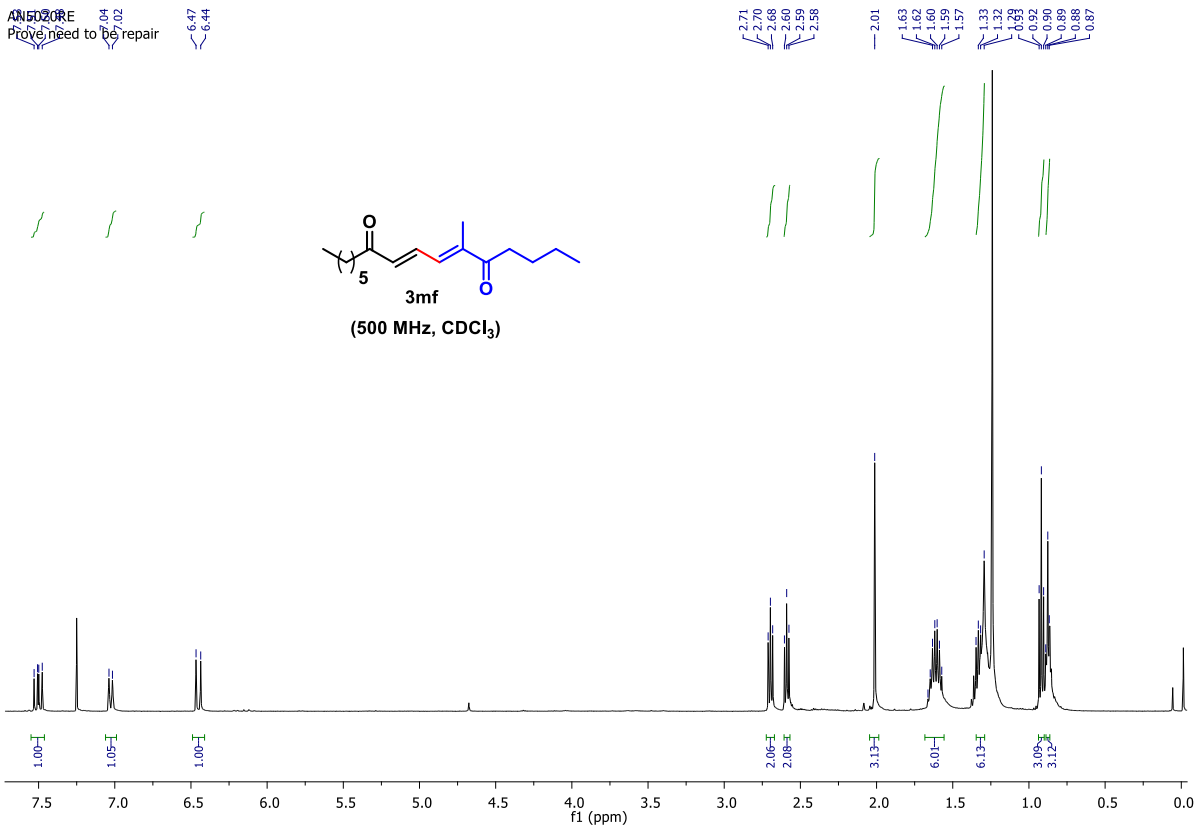

ANSOZORE  
Prove need to be repair

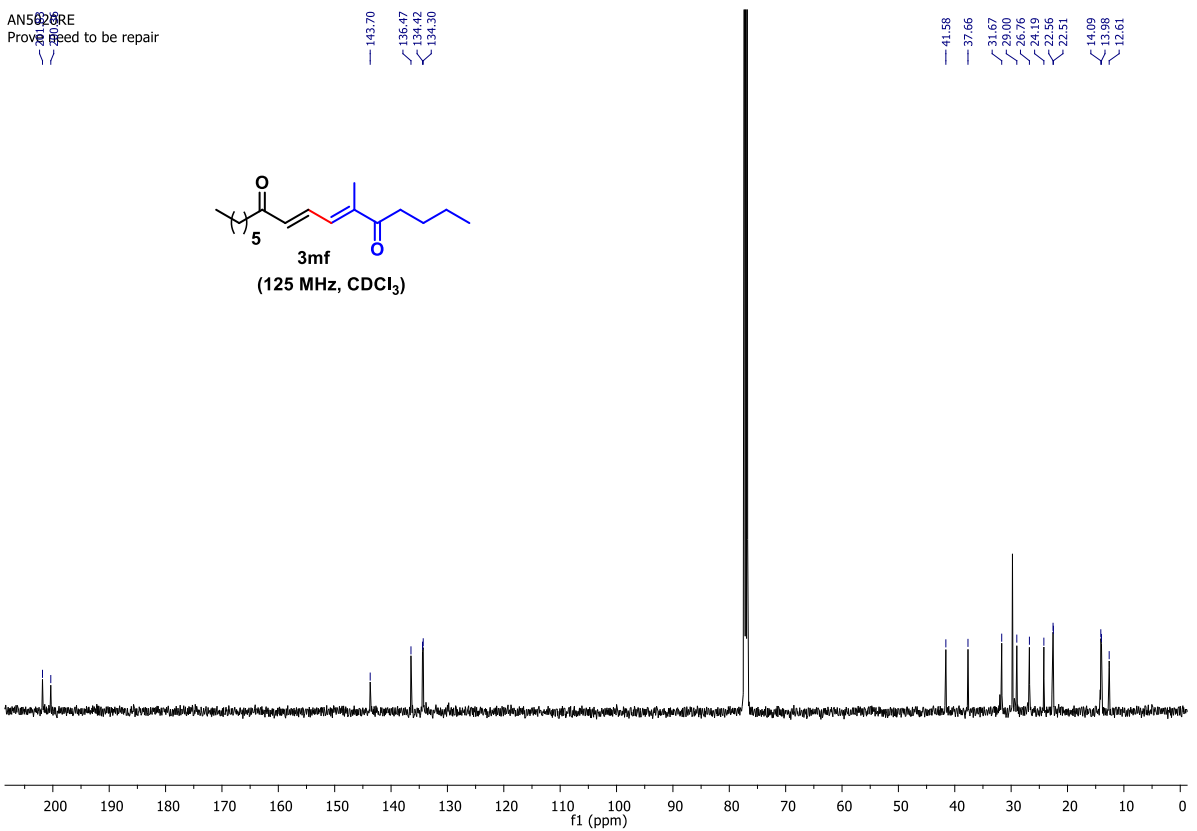





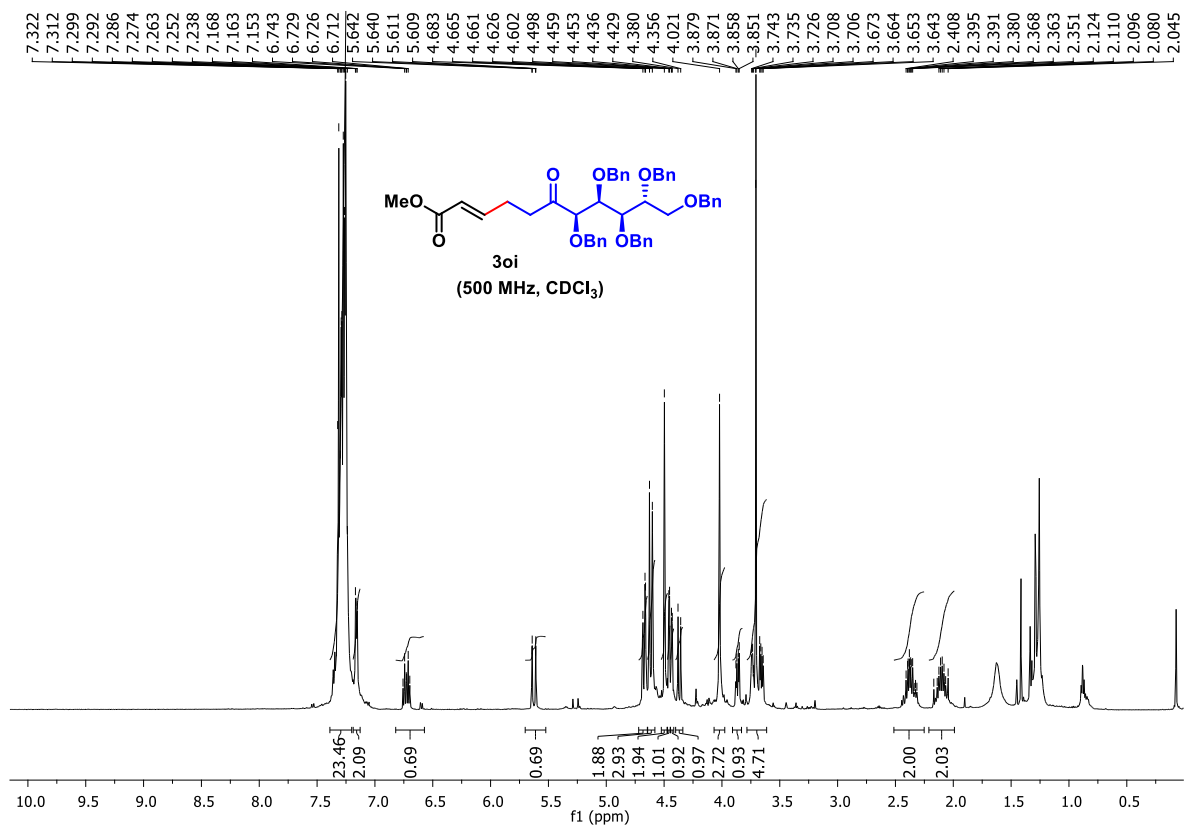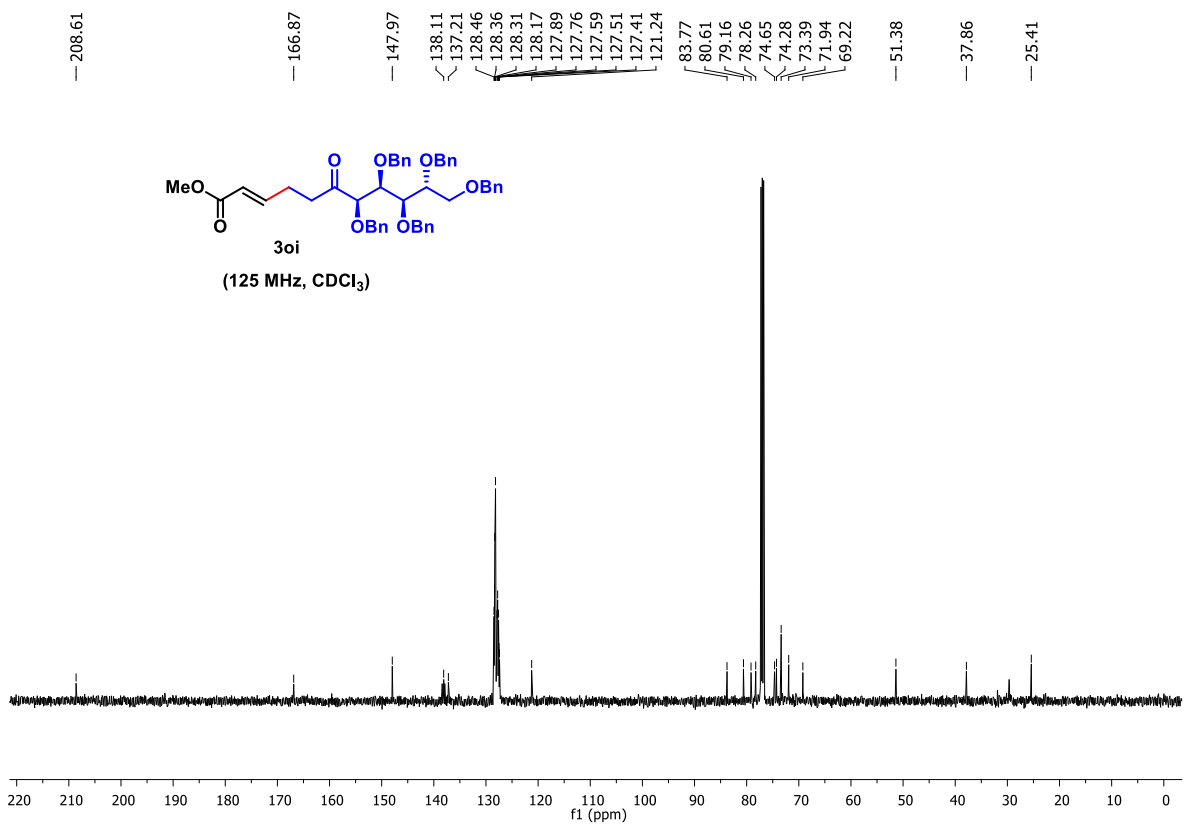

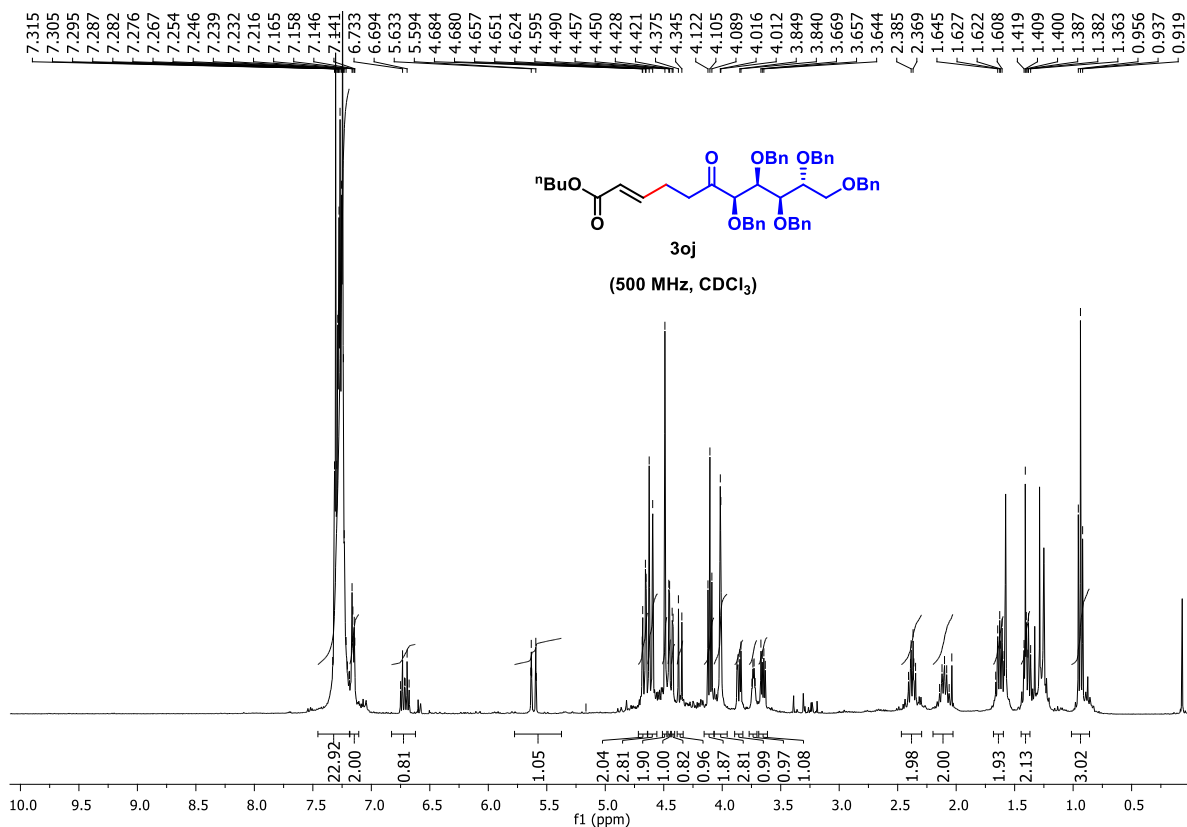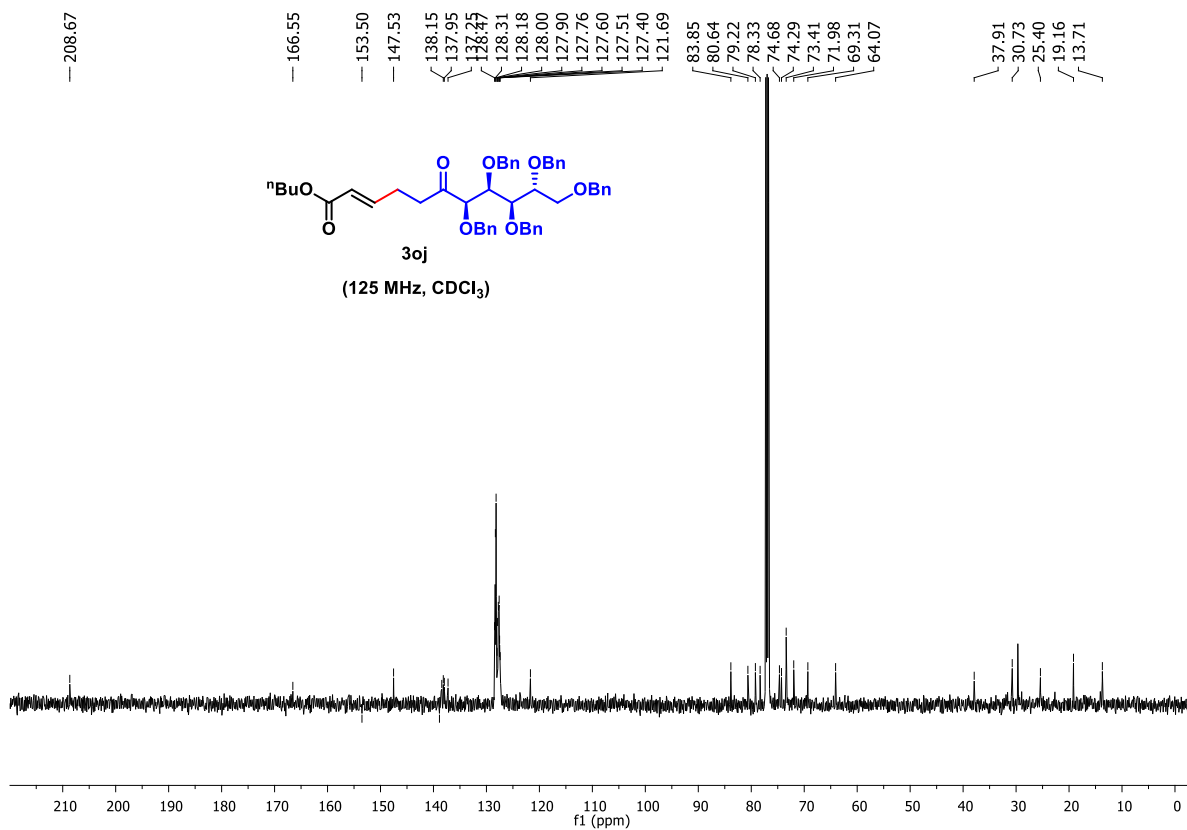

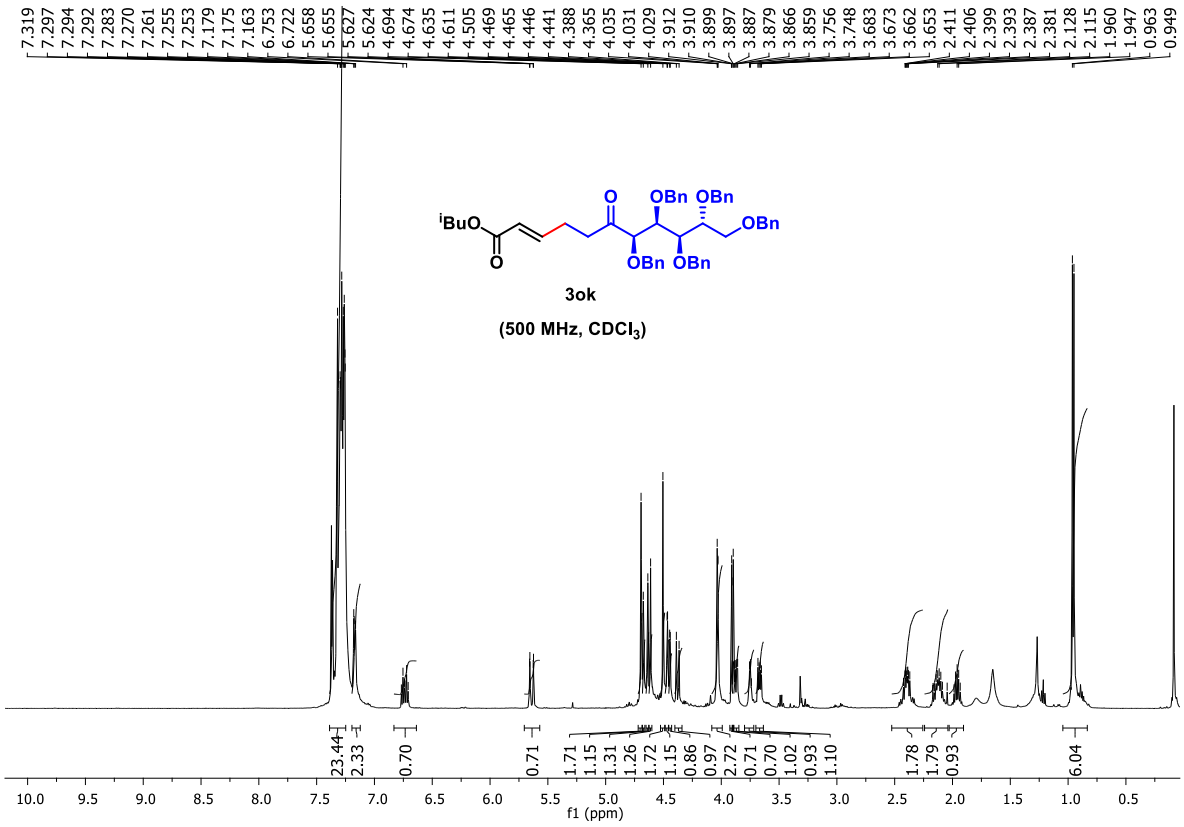

PROBE NEEDED TO BE REPAIRED  
PROBE NEEDED TO BE REPAIRED

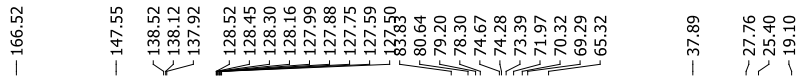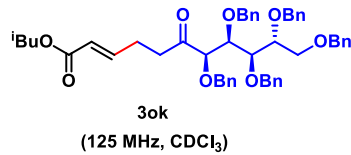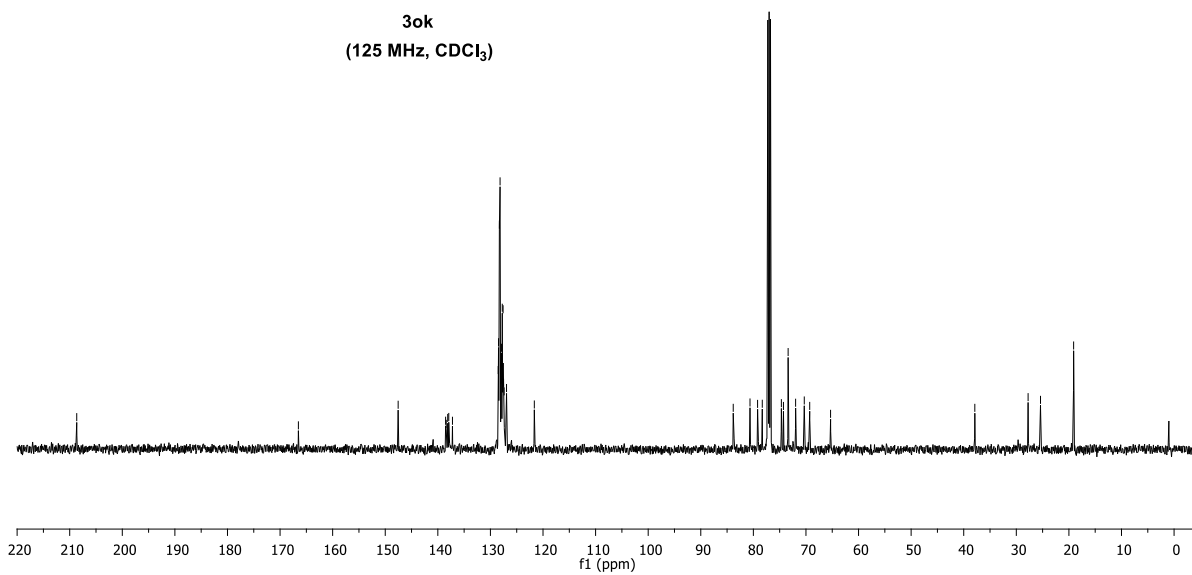

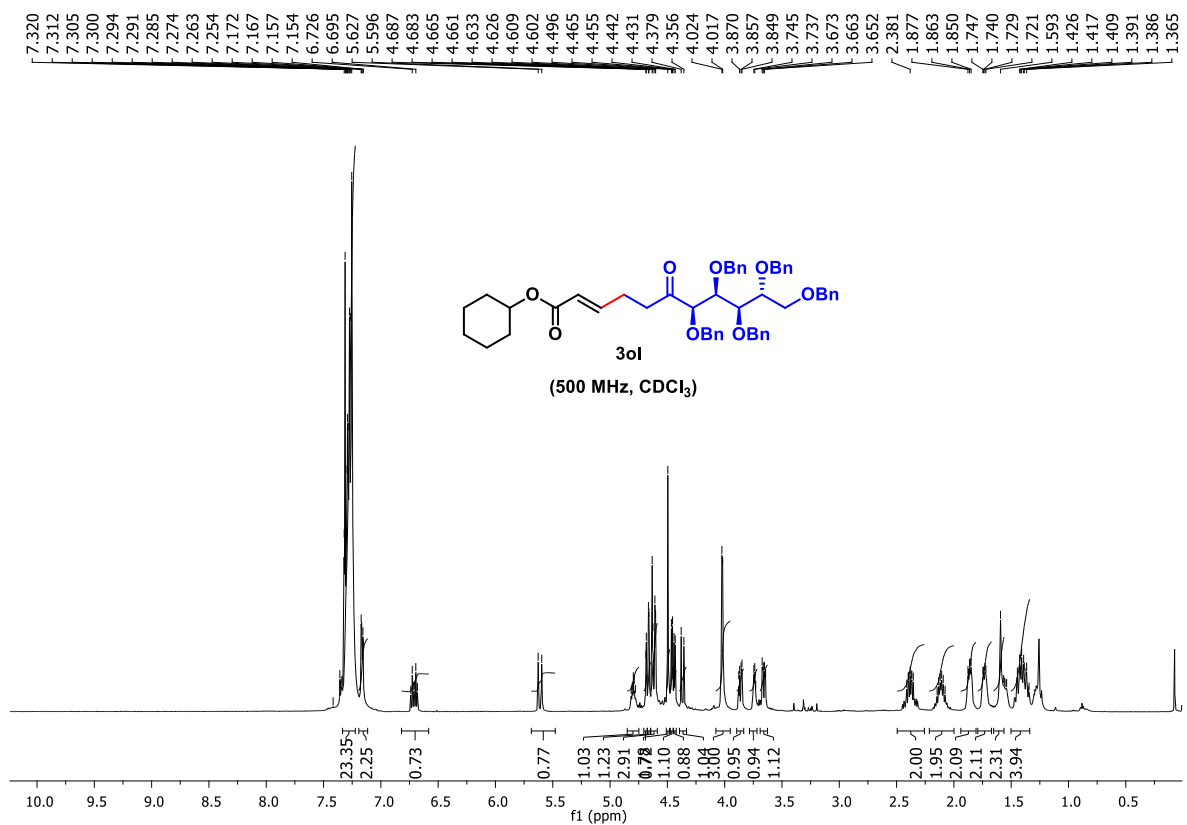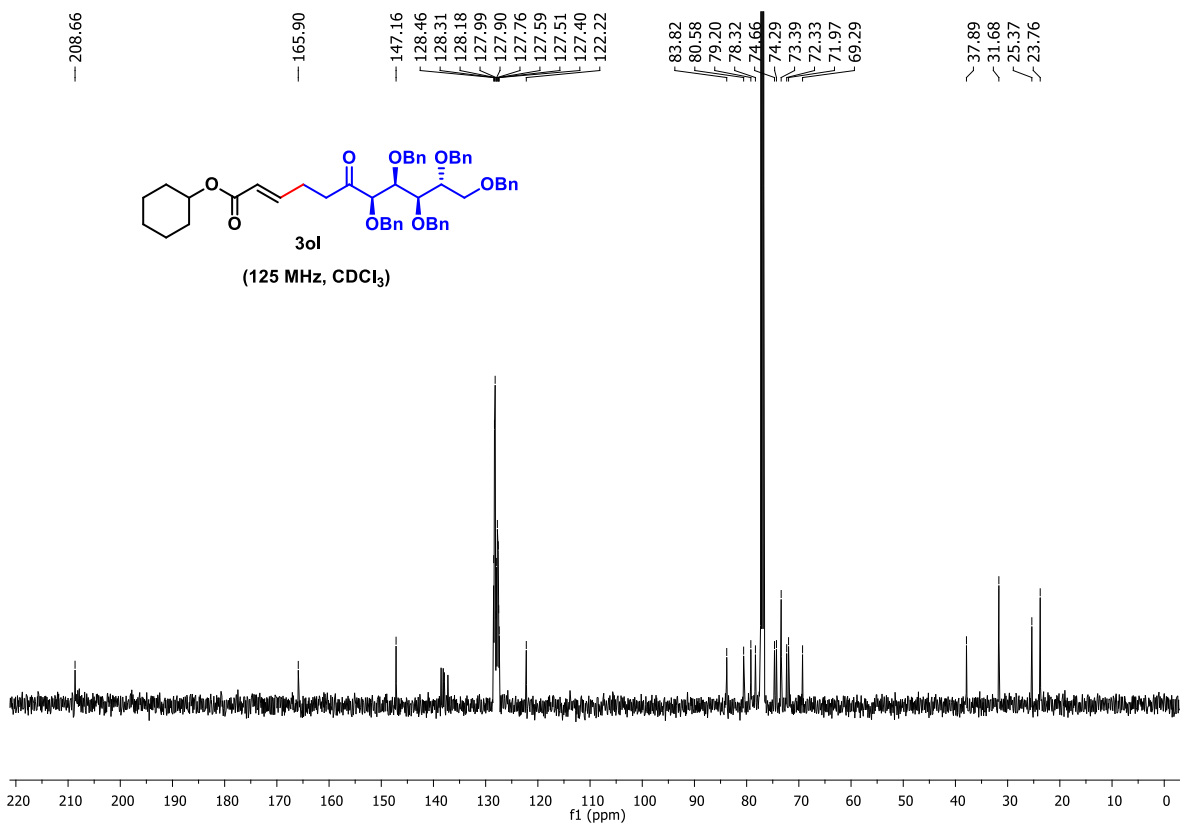

6. <sup>1</sup>H and <sup>13</sup>C NMR Spectra for the bioactive natural products 4, 5, 6 and 7

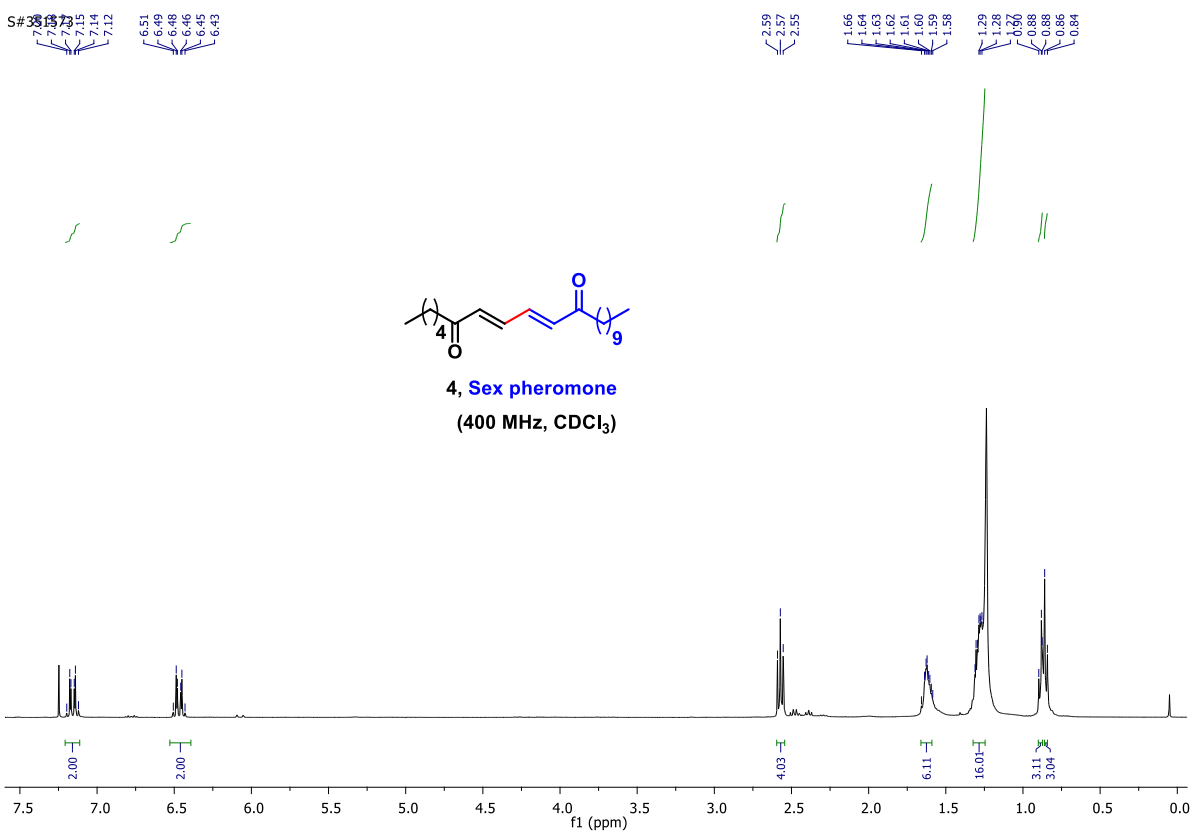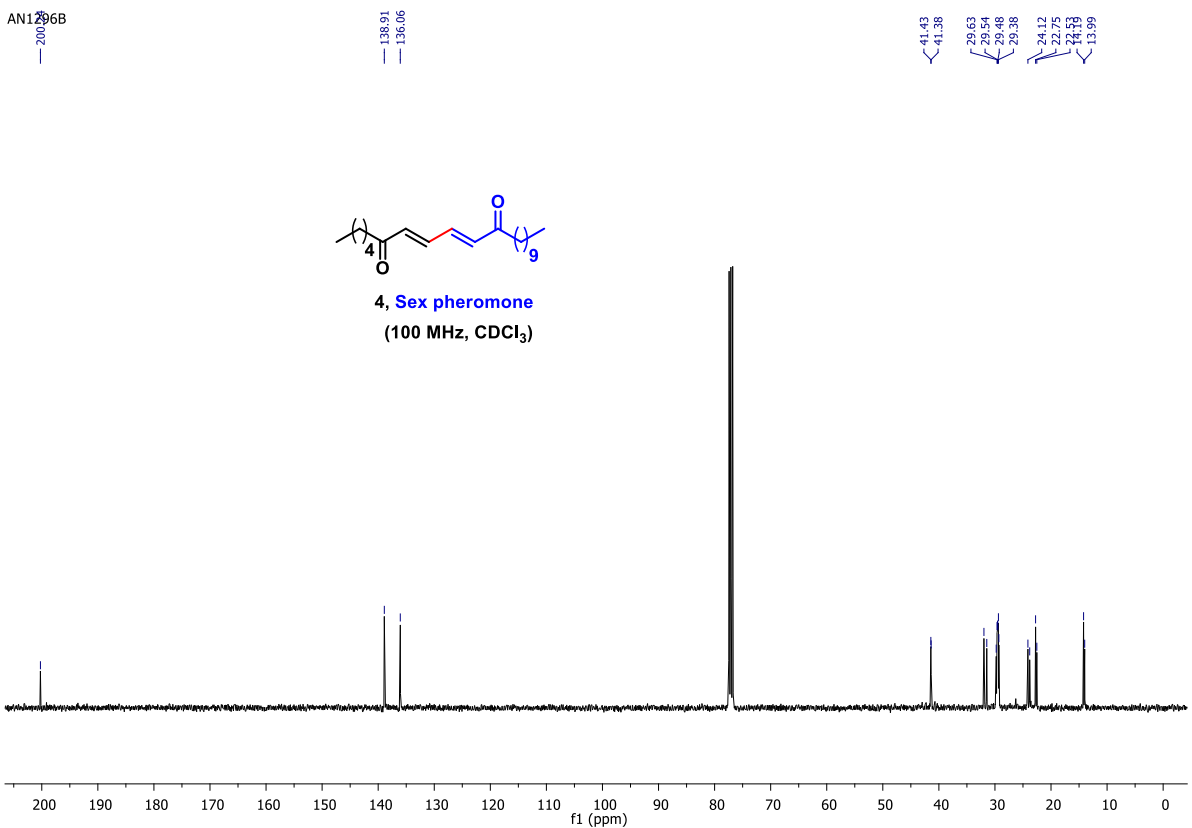

S#356879

7.20  
7.18  
7.17  
7.15  
7.13  
7.12  
6.51  
6.49  
6.48  
6.46  
6.45  
6.43

2.59  
2.58  
2.56

1.66  
1.64  
1.62  
1.60  
1.59  
1.31  
1.29  
1.27  
0.90  
0.88  
0.86

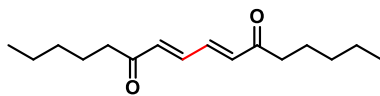

3gn'  
(400 MHz, CDCl<sub>3</sub>)

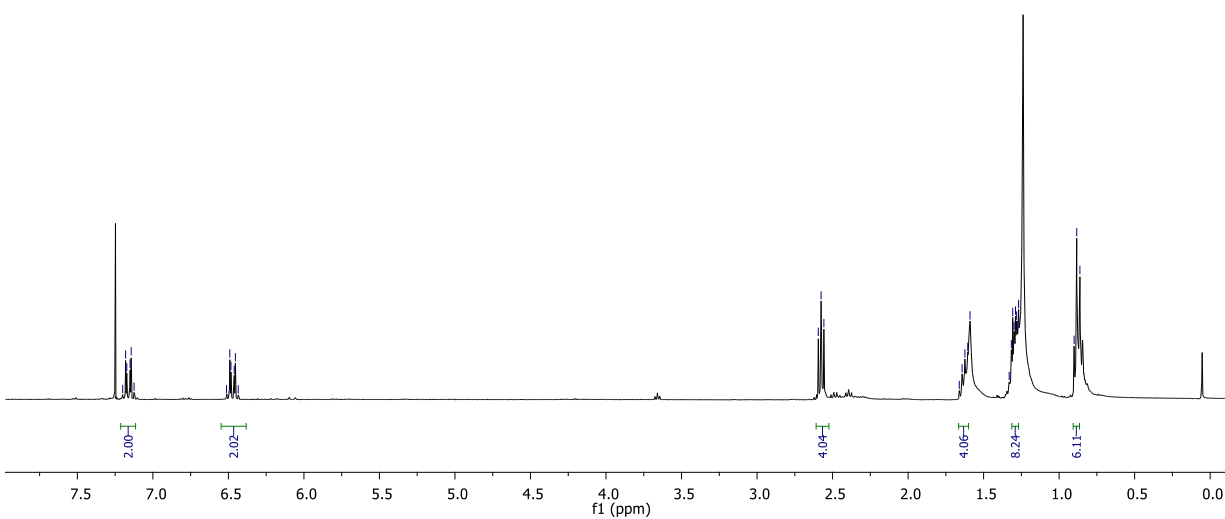

AN1296A

200.0

138.91  
136.06

41.43

31.96

24.12  
22.75

14.19

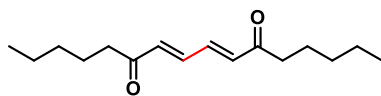

3gn'  
(100 MHz, CDCl<sub>3</sub>)

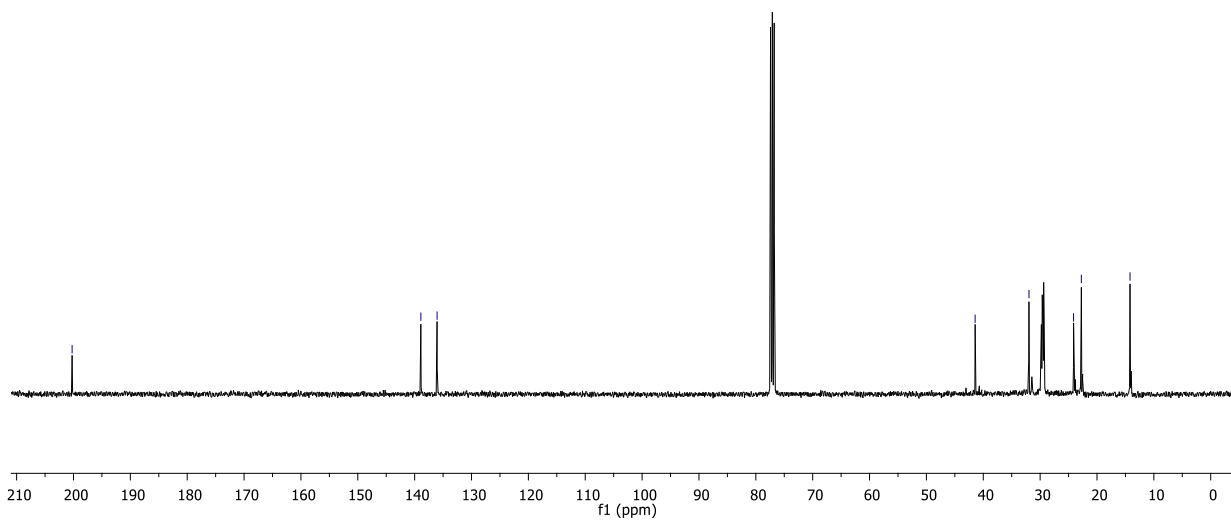

S#607578

7.19  
7.18  
7.17  
7.15  
7.14  
7.12  
6.50  
6.49  
6.48  
6.46  
6.45  
6.43

2.59  
2.57  
2.55

1.65  
1.63  
1.61  
1.59  
1.58  
1.27  
1.24  
0.88  
0.86  
0.84

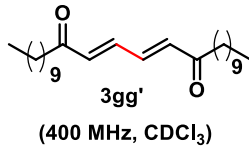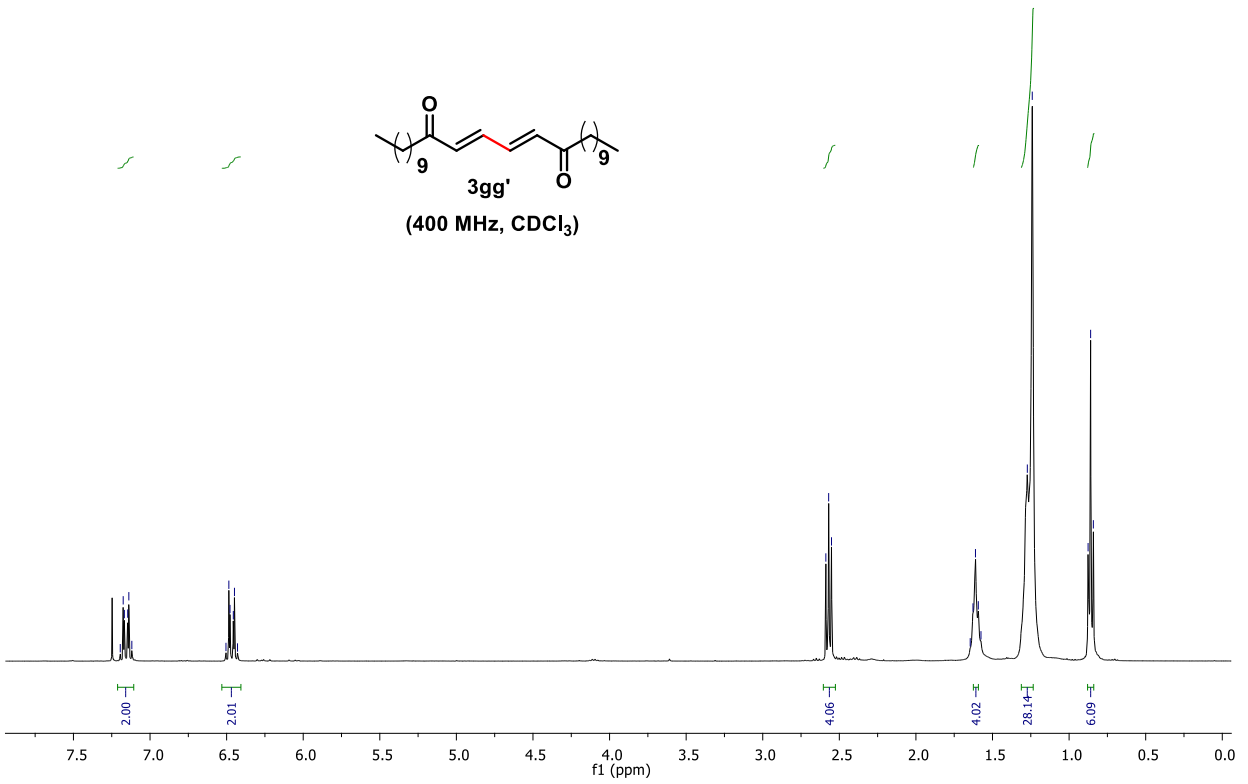

S#690757

200.2

138.91  
136.06

41.43  
31.06  
30.62  
30.54  
29.48  
29.38  
29.30  
24.12  
22.75  
14.19

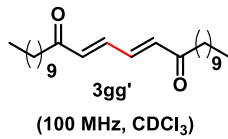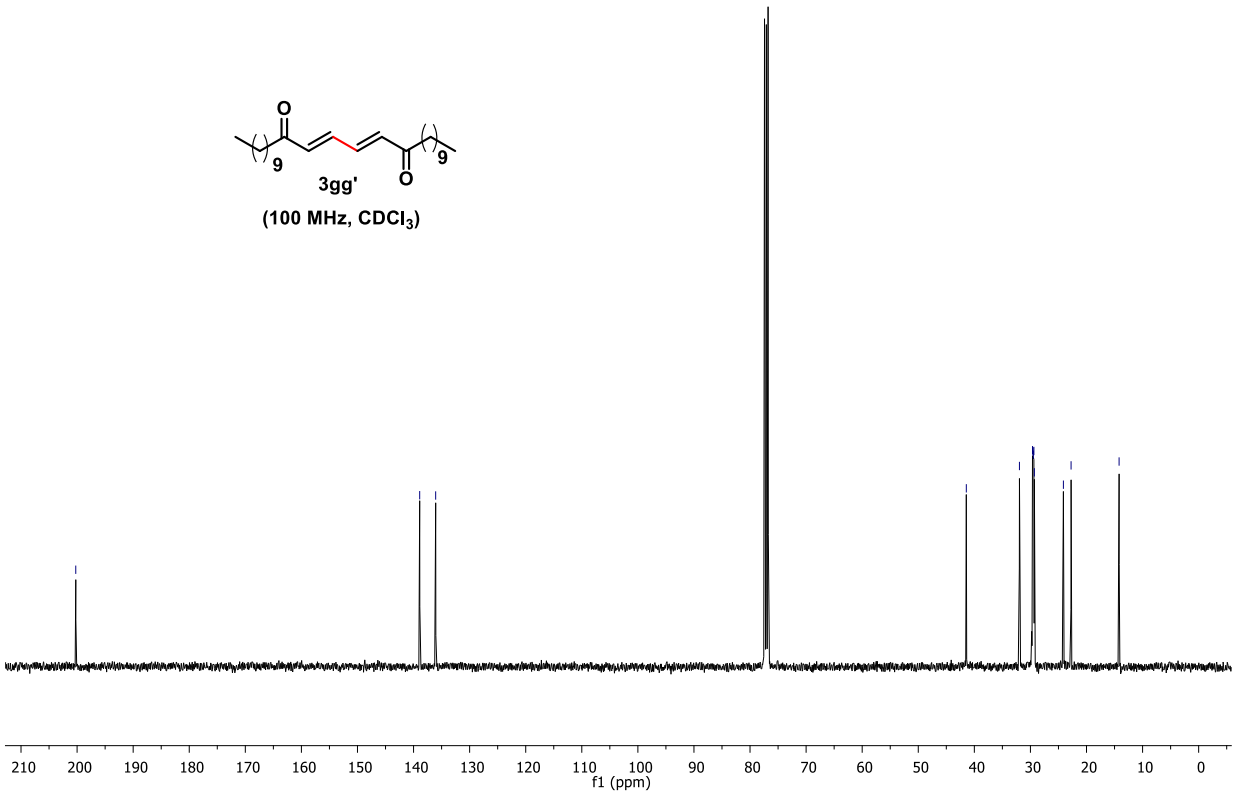

<sup>1</sup>H NMR spectrum of homodimer of decyl vinyl ketone obtained from 0.3 mmol scale. (6% yield)

S#540623

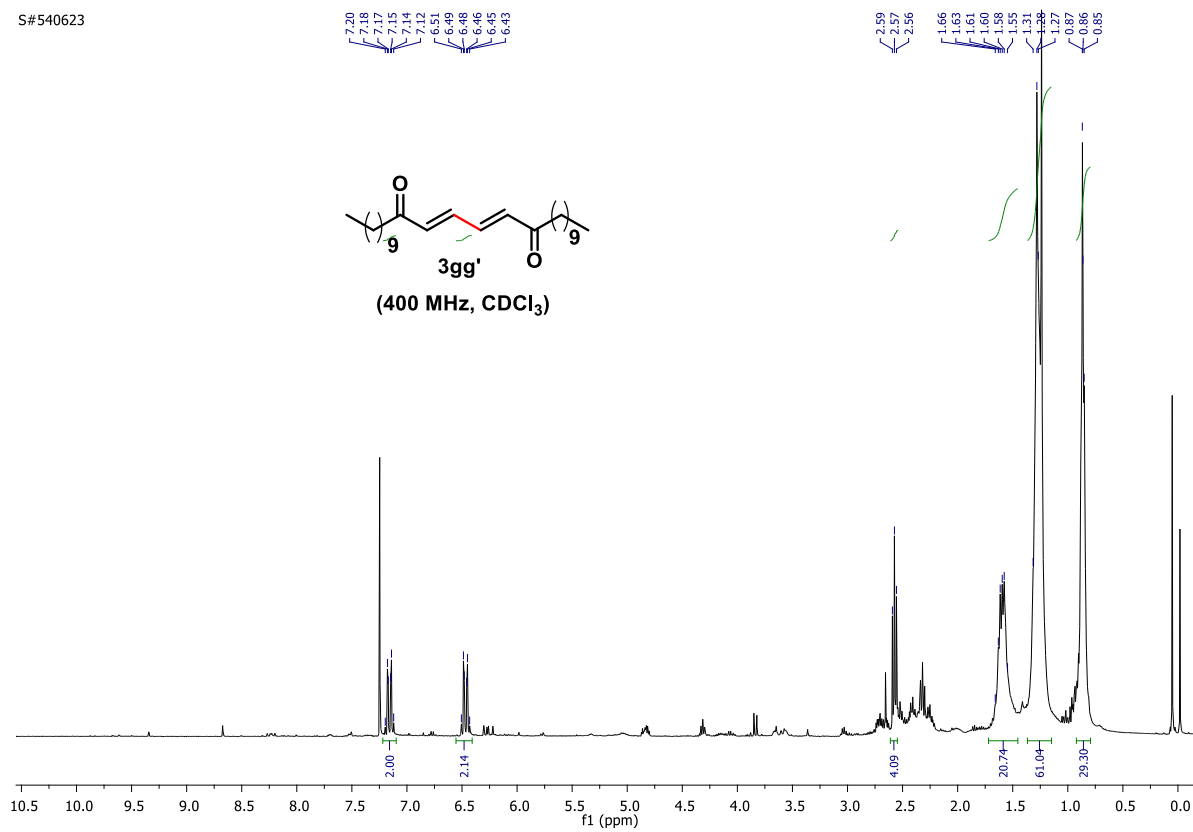



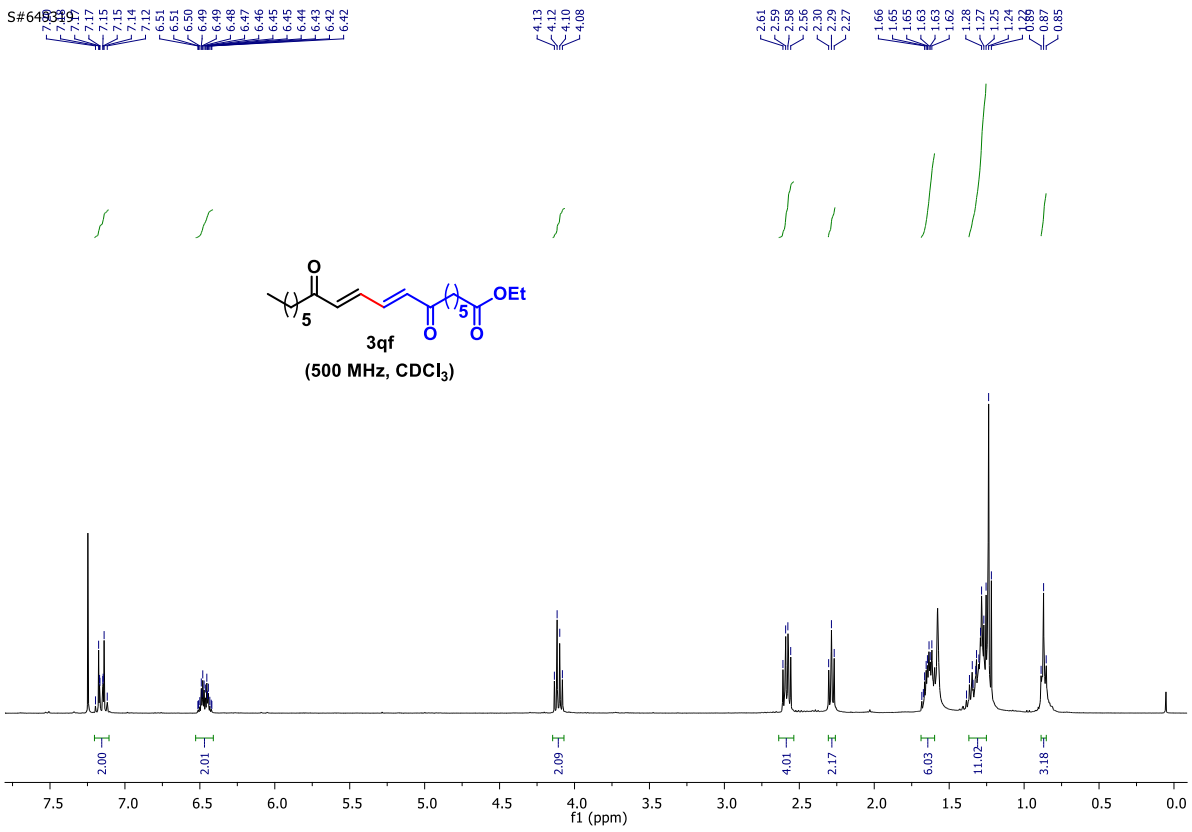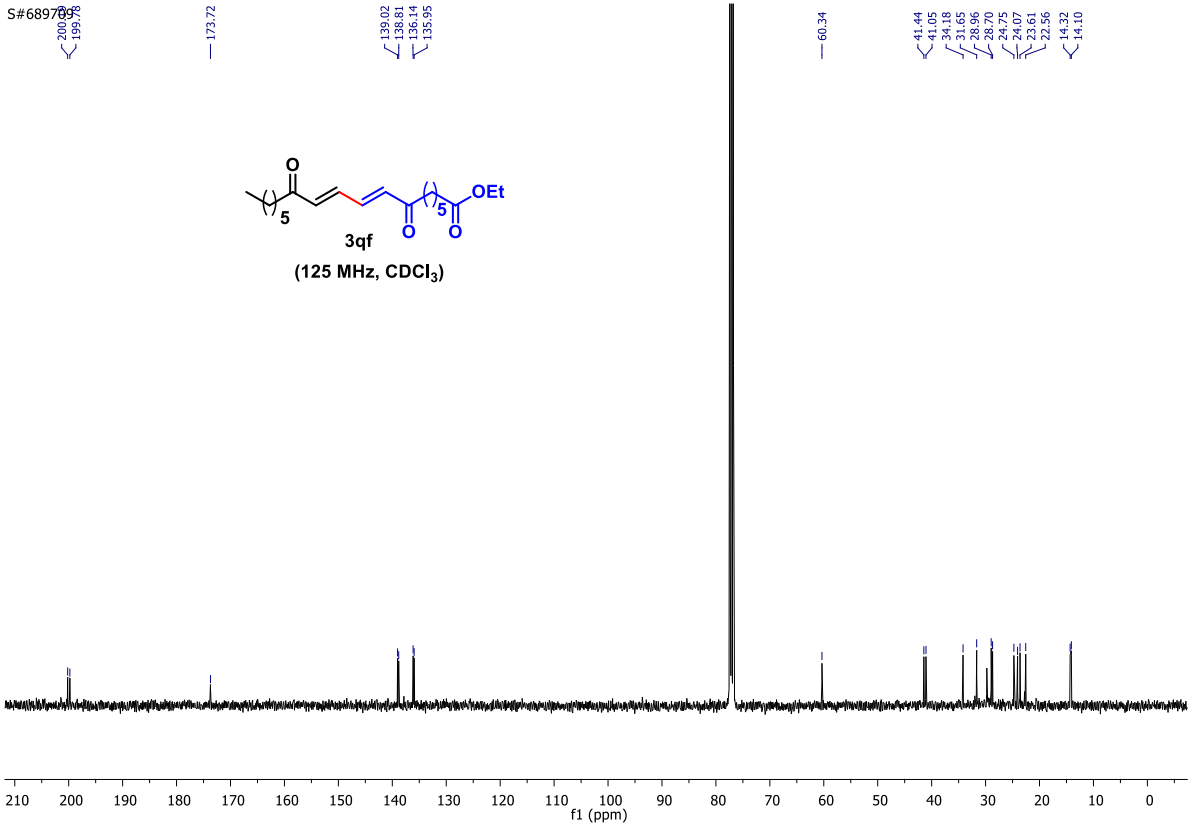

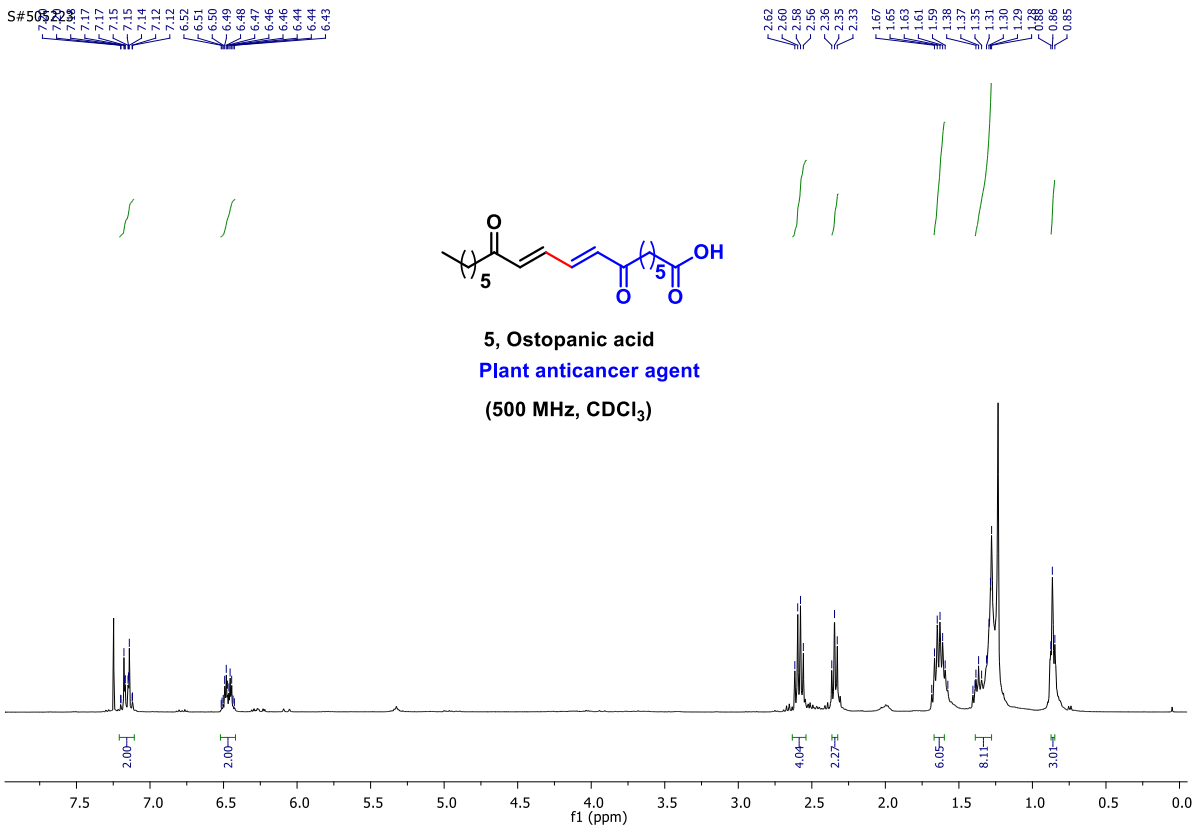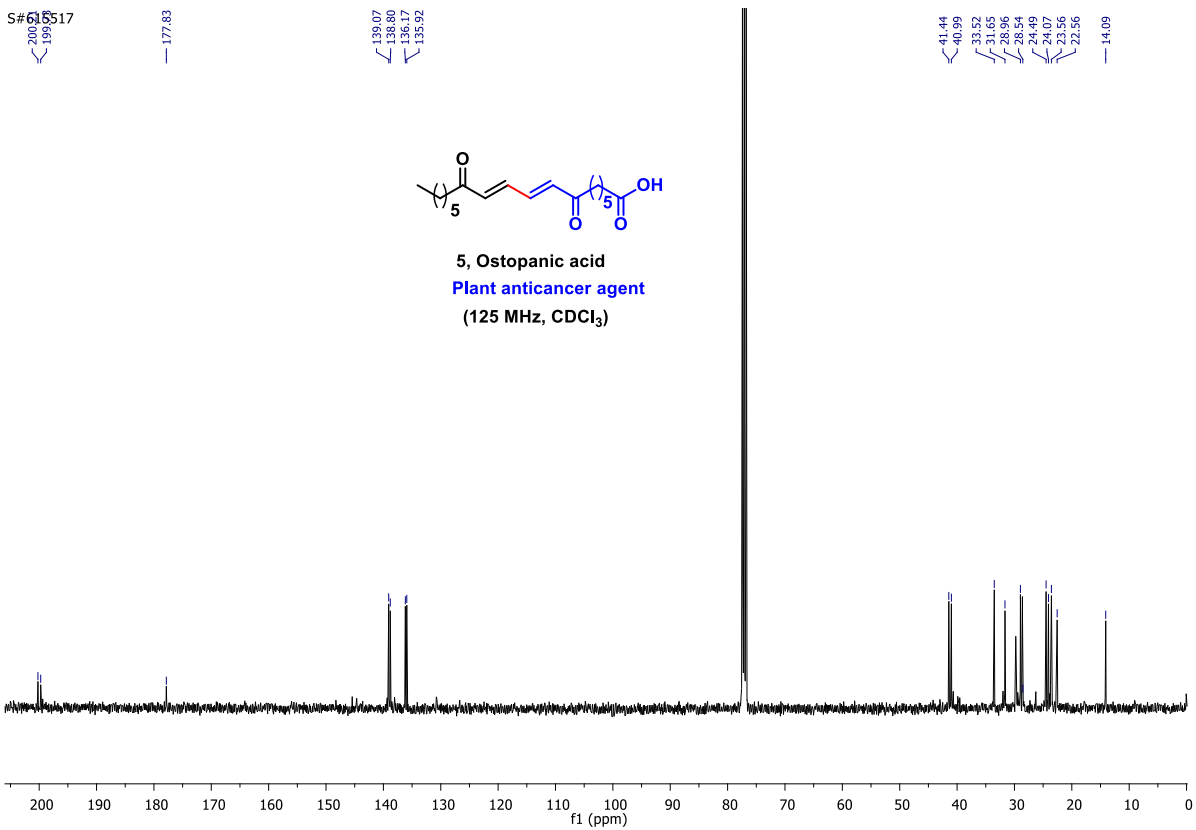

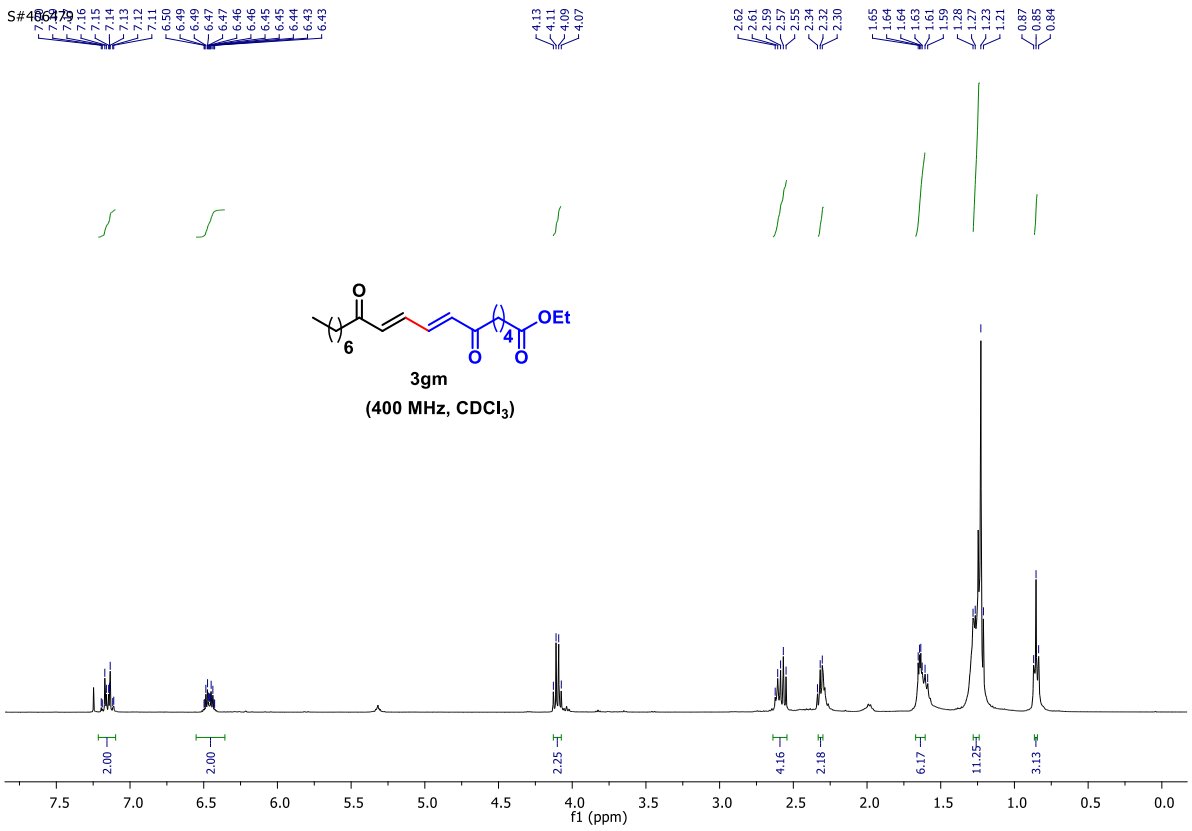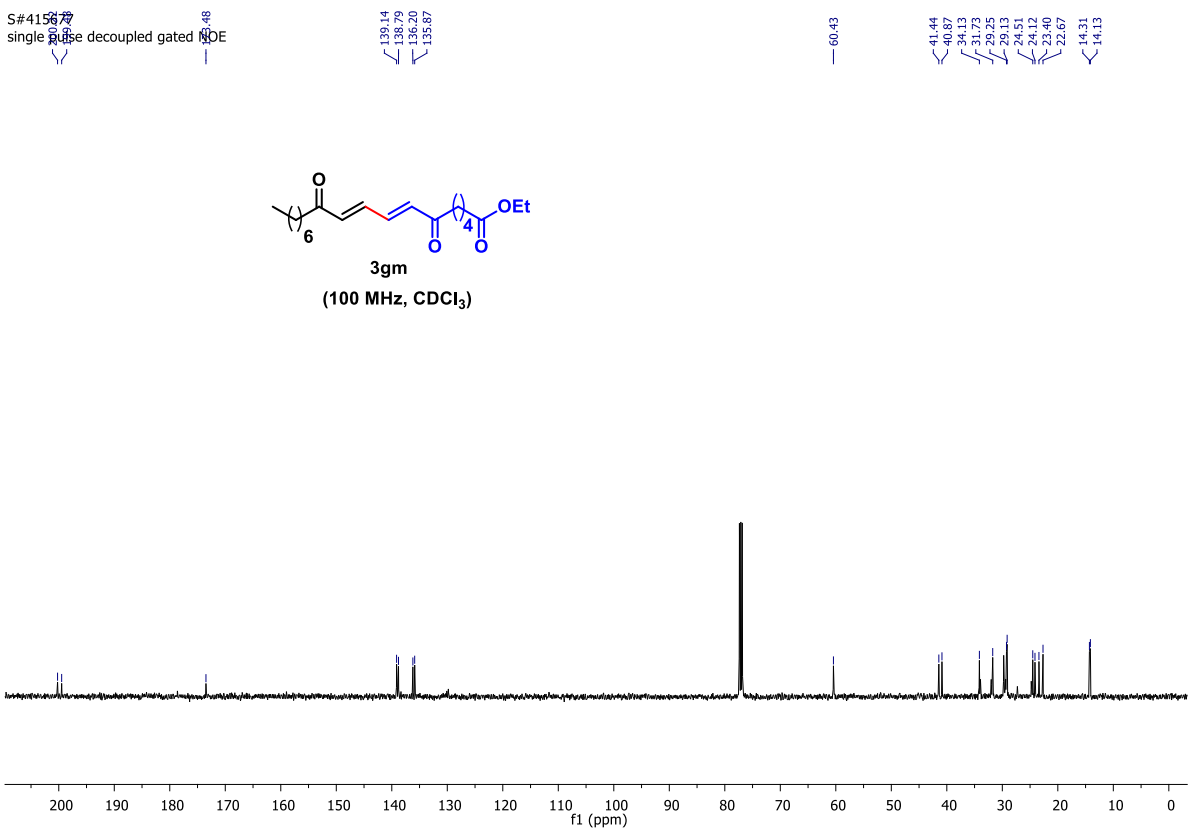

S#349813

7.19  
7.18  
7.17  
7.15  
7.14  
7.12  
6.51  
6.49  
6.48  
6.46  
6.45  
6.43

2.59  
2.57  
2.55

1.63  
1.61  
1.59  
1.57  
1.29  
1.28  
1.26  
0.86  
0.84

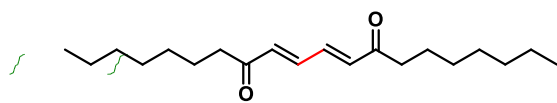

3gm'  
(500 MHz, CDCl<sub>3</sub>)

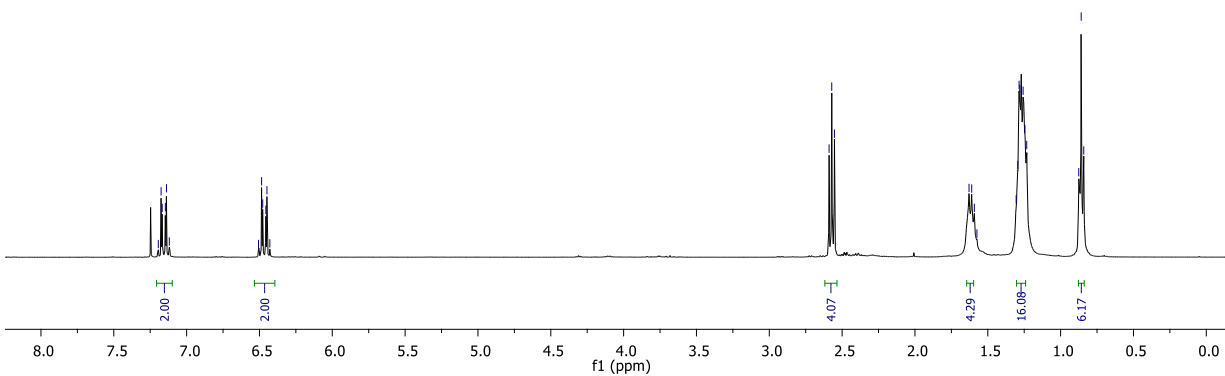

S#613569

200.23

138.90  
136.05

41.42

31.73  
29.25  
29.13  
24.12  
22.67

14.14

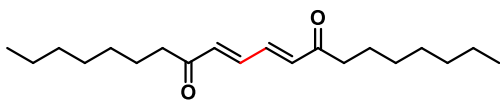

3gm'  
(100 MHz, CDCl<sub>3</sub>)

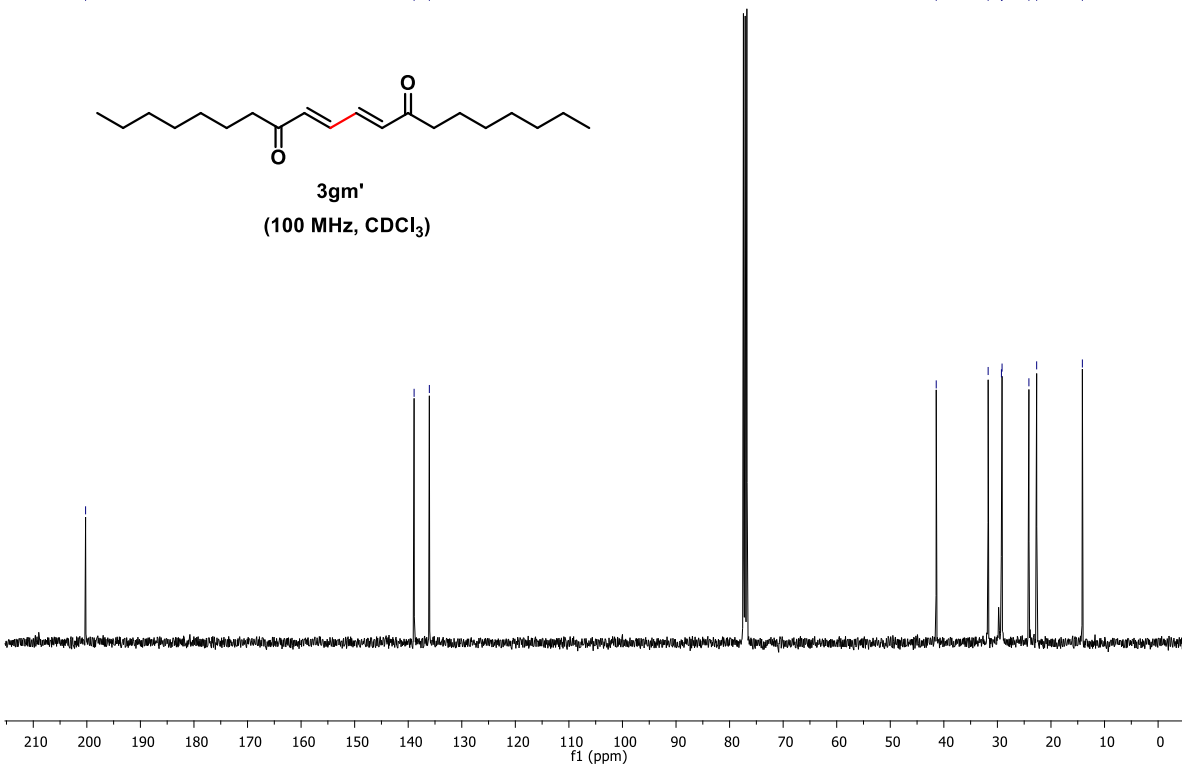

S#68738  
 7.27  
 7.21  
 7.15  
 7.14  
 7.13  
 7.12  
 6.51  
 6.50  
 6.48  
 6.47  
 6.46  
 6.45  
 6.43

2.64  
 2.62  
 2.60  
 2.58  
 2.56  
 2.55  
 2.39  
 2.37  
 2.36  
 2.35  
 1.68  
 1.67  
 1.65  
 1.63  
 1.59  
 1.28  
 1.28  
 1.26  
 0.88  
 0.85  
 0.84

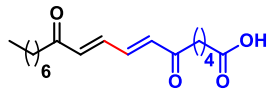

**6, JA**  
**Anti-tumor agent**  
**(500 MHz, CDCl<sub>3</sub>)**

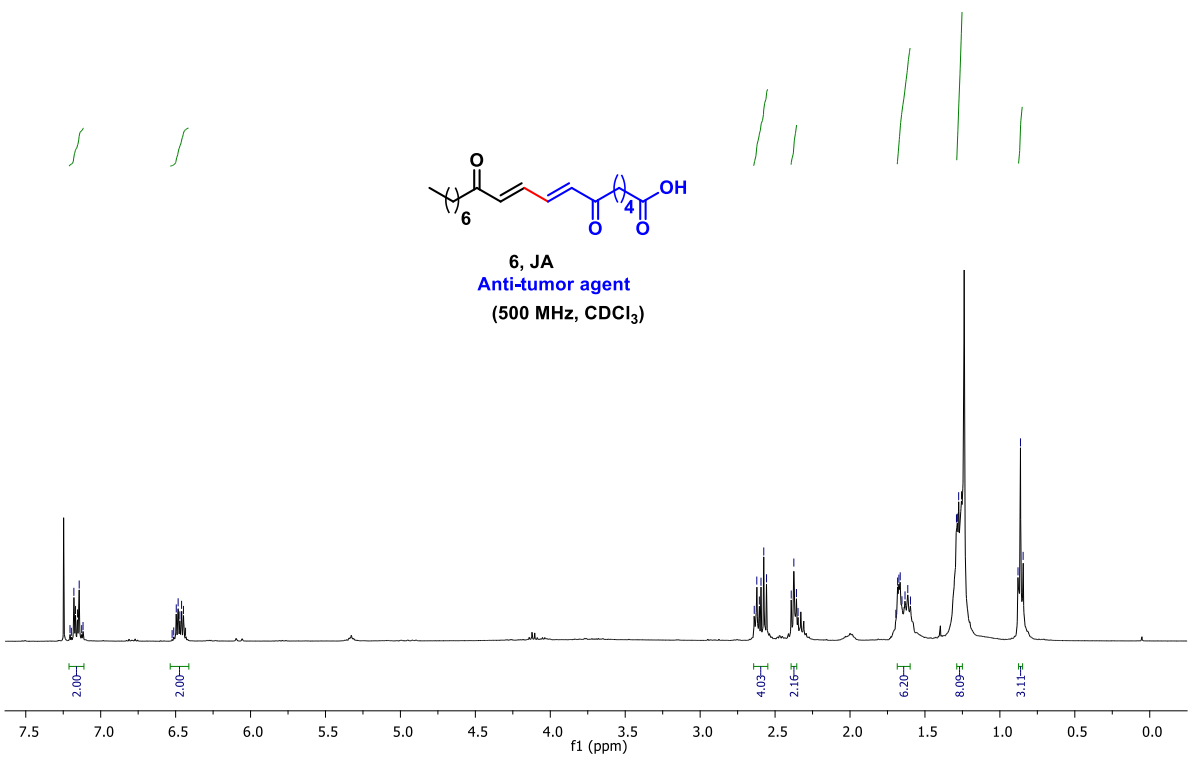

S#69744  
 200.66  
 199.41

178.41

139.22  
 138.78  
 136.25  
 135.83

41.45  
 40.81  
 33.65  
 31.74  
 28.25  
 28.14  
 24.11  
 23.26  
 22.68  
 14.15

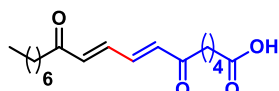

**6, JA**  
**Anti-tumor agent**  
**(125 MHz, CDCl<sub>3</sub>)**

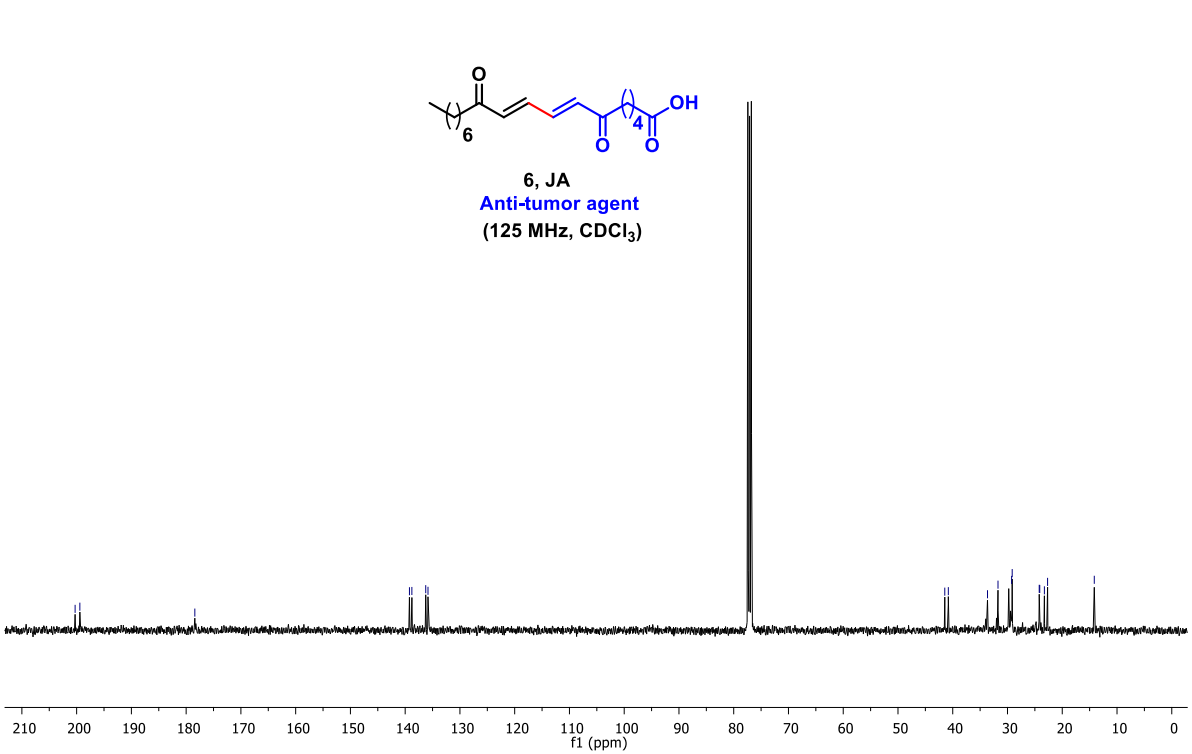

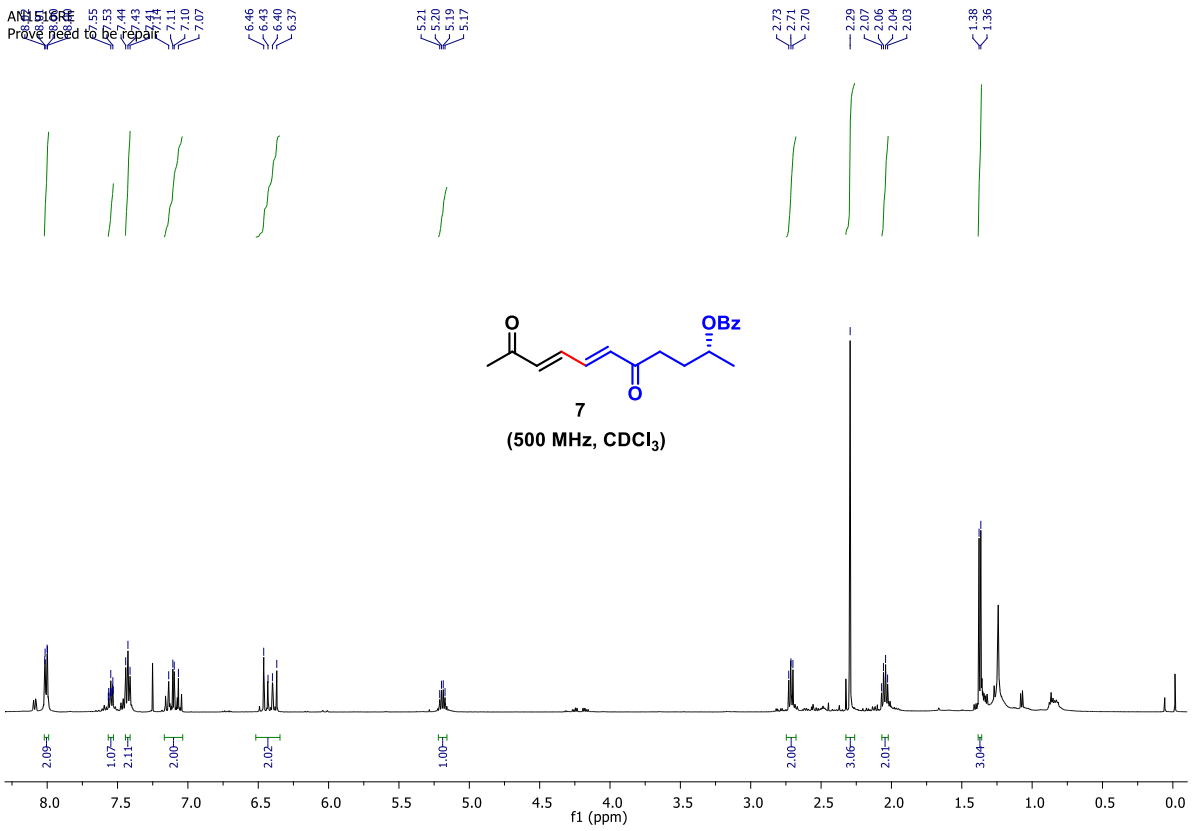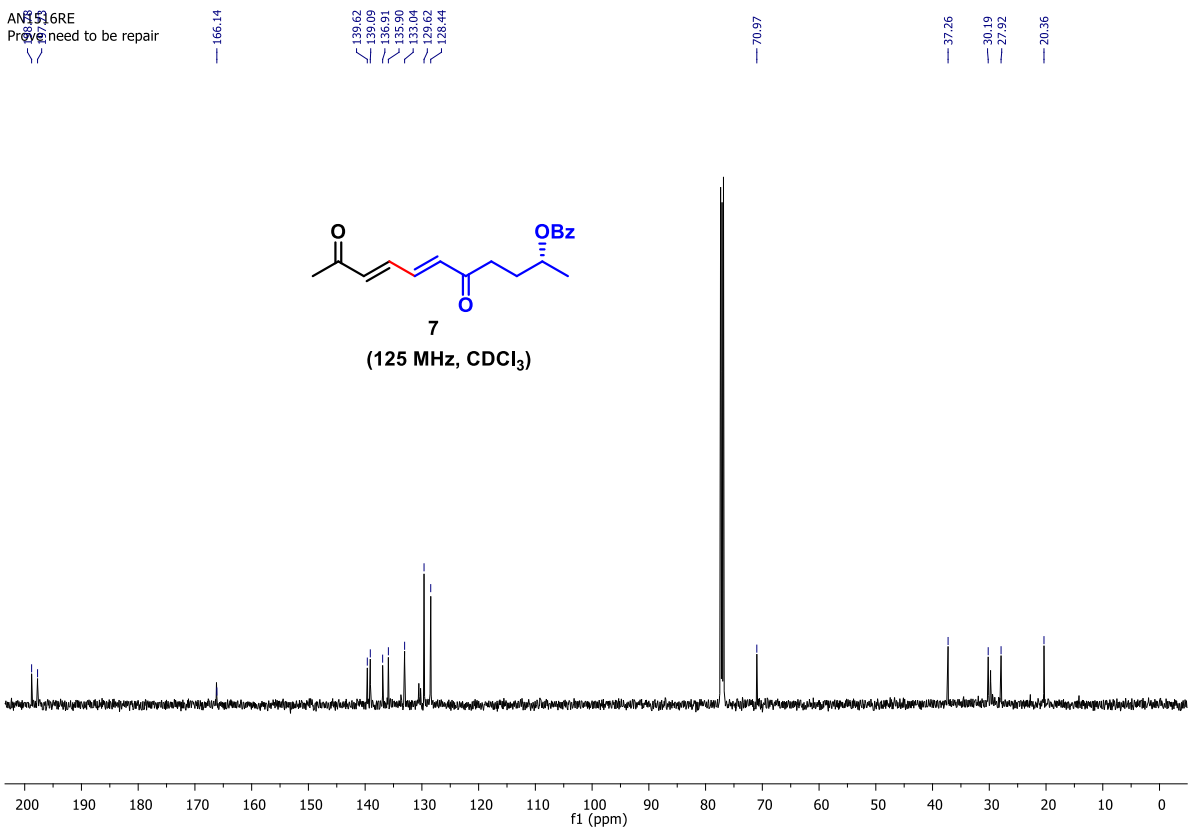

Comparison table

<sup>1</sup>H and <sup>13</sup>C NMR comparison between natural and synthetic (7*E*,9*E*)-heneicos-7,9-diene-6,11-dione (4)

| <sup>1</sup> H-NMR in CDCl <sub>3</sub> |                             | <sup>13</sup> C-NMR in CDCl <sub>3</sub> |                      |
|-----------------------------------------|-----------------------------|------------------------------------------|----------------------|
| Natural<br>400 MHz                      | Synthetic<br>500 MHz        | Natural<br>100 MHz                       | Synthetic<br>125 MHz |
| 0.92 - 0.86 (m)                         | 0.88 - 0.85 (m)             | 200.11                                   | 200.24               |
| 1.36 - 1.28 (m)                         | 1.32 - 1.25 (m)             | 200.10                                   | 200.24               |
| 1.67 - 1.59 (m)                         | 1.66 - 1.59 (m)             | 138.80                                   | 138.91               |
| 2.60 (t, <i>J</i> = 7.5 Hz)             | 2.57 (t, <i>J</i> = 7.4 Hz) | 138.79                                   | 138.91               |
| 6.49 (dd, <i>J</i> = 11.5, 2.8 Hz)      | 6.53 - 6.39 (m)             | 135.97                                   | 136.06               |
| 7.18 (dd, <i>J</i> = 11.5, 2.8 Hz)      | 7.21 - 7.11 (m)             | 135.96                                   | 136.06               |
|                                         |                             | 41.35                                    | 41.43                |
|                                         |                             | 41.31                                    | 41.38                |
|                                         |                             | 31.88                                    | 31.96                |
|                                         |                             | 31.38                                    | 31.46                |
|                                         |                             | 29.55                                    | 29.63                |
|                                         |                             | 29.46                                    | 29.54                |
|                                         |                             | 29.40                                    | 29.48                |
|                                         |                             | 29.30                                    | 29.38                |
|                                         |                             | 29.22                                    | 29.30                |
|                                         |                             | 24.04                                    | 24.12                |
|                                         |                             | 23.72                                    | 23.80                |
|                                         |                             | 22.67                                    | 22.77                |
|                                         |                             | 22.45                                    | 22.64                |
|                                         |                             | 14.11                                    | 14.09                |
|                                         |                             | 13.91                                    | 13.99                |

<sup>1</sup>H and <sup>13</sup>C NMR comparison between natural and synthetic Ostopanic acid (5)

| <sup>1</sup> H-NMR in CDCl <sub>3</sub> |                             | <sup>13</sup> C-NMR in CDCl <sub>3</sub> |                      |
|-----------------------------------------|-----------------------------|------------------------------------------|----------------------|
| Natural<br>400 MHz                      | Synthetic<br>500 MHz        | Natural<br>100 MHz                       | Synthetic<br>125 MHz |
| 0.87 (t, <i>J</i> = 6.7 Hz)             | 0.87 (t, <i>J</i> = 6.8 Hz) | 200.2                                    | 200.21               |
| 1.30 (m)                                | 1.39 - 1.28 (m)             | 199.7                                    | 199.73               |
| 1.64 (m)                                | 1.67 - 1.59 (m)             | 178.3                                    | 177.83               |
| 2.36 (t, <i>J</i> = 7.4 Hz)             | 2.34 (t, <i>J</i> = 7.5 Hz) | 139.0                                    | 139.07               |
| 2.57 (t, <i>J</i> = 7.4 Hz)             | 2.57 (t, <i>J</i> = 7.3 Hz) | 138.7                                    | 138.80               |
| 2.59 (t, <i>J</i> = 7.0 Hz)             | 2.59 (t, <i>J</i> = 7.1 Hz) | 136.1                                    | 136.17               |
| 6.50 - 6.43 (m)                         | 6.52 - 6.42 (m)             | 135.8                                    | 135.92               |
| 7.19 - 7.13 (m)                         | 7.21 - 7.11 (m)             | 41.6                                     | 41.44                |
|                                         |                             | 40.7                                     | 40.99                |
|                                         |                             | 33.7                                     | 33.52                |
|                                         |                             | 31.5                                     | 31.65                |
|                                         |                             | 28.8                                     | 28.96                |
|                                         |                             | 28.5                                     | 28.54                |
|                                         |                             | 24.4                                     | 24.49                |
|                                         |                             | 24.0                                     | 24.07                |
|                                         |                             | 23.5                                     | 23.56                |
|                                         |                             | 22.4                                     | 22.56                |
|                                         |                             | 14.0                                     | 14.09                |
